# Supplementary material for: Development of an immune-related signature for predicting survival outcome and immunotherapy response in osteosarcoma
Source: Aging (Albany NY). 2021 Nov 8;13(21):24155–70. doi: 10.18632/aging.203671 (PMC8610143; doi:10.18632/aging.203671)
Supplement: Supplementary Table 1 [file aging-13-203671-s002.xlsx]

## Sheet: Supplementary Table 1
Supplementary Table 1. Results of univariate Cox regression analysis of all immune-related genes based on the gene expression data from the TARGET cohort.
Gene symbol	OS P values
ZYX	8.66594e-05
SOCS1	0.000180691
SDC3	0.00020639
TNFRSF1A	0.000248365
MAP3K14	0.000298765
PPARG	0.000423155
IL7	0.000524324
PML	0.000560316
HGF	0.000750892
BMP15	0.000759273
WNT5A	0.00085511
CD79A	0.000909191
SH3BP2	0.000935704
TNFRSF10C	0.00104096
GBP2	0.00109034
CCL2	0.0011467
TNFRSF12A	0.00117581
BCL10	0.00123534
VCAM1	0.00125792
CXCL12	0.00137889
IGLV1.51	0.00148376
CMTM1	0.00154196
S1PR2	0.00173336
TNFRSF21	0.00176558
IGHD1.7	0.00194915
GRN	0.00205639
S100A3	0.0021923
TRAC	0.00223567
CAT	0.00229337
FAS	0.00229983
PSMD10	0.00236543
PSMC4	0.00259121
FPR1	0.00274261
GZMB	0.00297046
IL13RA2	0.00298196
CXCL13	0.00299227
RASGRP1	0.00303046
PTN	0.00357776
SEMA3A	0.00358097
ENG	0.00362086
IGLJ6	0.003769
TGFBR1	0.00386989
MC1R	0.00408199
BPI	0.00424882
LTB4R	0.00426471
CMTM3	0.00428684
EGFR	0.00430134
ADRB2	0.00437913
PTGFR	0.00441715
FGFRL1	0.00479776
ANXA6	0.00490752
TMPRSS6	0.00499458
NR2F1	0.00506044
IL31RA	0.00509424
TMSB4X	0.00519855
HSPA1L	0.00530546
PLXNA2	0.00548726
GAL	0.00561846
CCL8	0.00564838
CMTM7	0.00574512
IFNGR1	0.00581881
MTNR1B	0.00617675
CORT	0.00623708
MDK	0.00624606
CD3G	0.00691333
CYSLTR1	0.00702268
COLEC10	0.00713298
FCER1G	0.00713404
AGTR1	0.00766339
CMKLR1	0.00776467
TRAJ21	0.00789377
CD8B	0.00801182
PTGDR	0.00830505
TRBV17	0.00857794
TAP2	0.00860175
IGHV4.39	0.00878438
S100A11	0.00902019
LILRB3	0.00903271
IL2RA	0.00905398
WFIKKN1	0.00908721
LTB	0.00942112
S100A8	0.00959361
IGHA1	0.00978525
TGFBR2	0.00980561
HFE	0.01006
SPAG11B	0.0101255
PSPN	0.0101791
IFNAR2	0.0102464
CD209	0.010389
TAPBP	0.0107552
CETP	0.0110428
NEO1	0.0112497
DEFA5	0.0112576
MX2	0.0114738
S100A6	0.0115214
IL2RG	0.0115915
TRBV7.3	0.0117535
PPARD	0.0118847
TRBV20.1	0.0119013
IGHV4.34	0.0119937
LTA	0.0124038
ACTG1	0.0124933
PLXND1	0.0128096
DAXX	0.0129958
PIK3R2	0.0130103
IL10	0.0130798
NUDT6	0.0132231
PDK1	0.0132586
GCG	0.0132752
HMOX1	0.0135525
TGFBR3	0.0135805
THRA	0.0137022
CXCR3	0.0140295
CCR4	0.0140509
IFNGR2	0.0142148
MAPK1	0.0143248
FCGR2B	0.0145401
FABP6	0.0145752
TAP1	0.0146244
PIK3CG	0.0146418
APOBEC3C	0.0147212
PSMD2	0.0148499
TRIM5	0.0153535
IGLV2.14	0.0153717
RAET1G	0.0153901
TRBV14	0.0154082
CSF1	0.0158847
MAPK14	0.0159119
TRAV9.2	0.0161923
IGKV3.11	0.0162238
TRAV2	0.0164207
TXLNA	0.016438
SEMA6A	0.0165272
TRBV9	0.0166944
NFKB1	0.016737
LGMN	0.0168208
IGHV1.46	0.016965
ADIPOR2	0.0170953
TLR4	0.0172052
XCR1	0.0172698
KRAS	0.0173437
TK2	0.0174765
IGHG2	0.017615
IGLV2.23	0.0176722
AVPR2	0.017738
PRF1	0.0179713
CD8A	0.0183391
VAV1	0.0184451
CARD11	0.0184776
CTSL	0.0186158
TYROBP	0.0187286
PSMD3	0.0188185
C3AR1	0.0189051
AKT2	0.0189769
IGHA2	0.0189776
IGKV1.9	0.0190561
CXCL11	0.0192164
IGHG3	0.0195045
RNASE2	0.0198623
MICA	0.0201553
CDC42	0.0203735
TNFRSF1B	0.0204826
JAG2	0.0206852
TRAV1.2	0.0207867
PIK3R5	0.020969
CHP1	0.0210401
IL6ST	0.0210614
TRBV6.5	0.0211218
MAVS	0.0214468
IGLV3.10	0.0214515
PLCG2	0.0214549
DHX58	0.0215232
IFITM1	0.0215383
TNFSF8	0.0222926
CSRP1	0.0224879
IGLV3.1	0.0226664
NR1H3	0.0229998
IGHV1.24	0.0231031
DEFB128	0.023727
STC2	0.0238766
SDC1	0.0239383
PRLR	0.0240928
CD4	0.0241175
QRFP	0.024256
IL27RA	0.0242875
APOBEC3F	0.0243854
S100A5	0.0248037
IGLV3.19	0.025154
CSF3R	0.0251686
LCP2	0.0251808
NFATC3	0.0252032
ERAP2	0.0254142
PSME3	0.0255332
NFKBIB	0.0258846
TNFRSF19	0.0260079
TNFSF10	0.0261643
FCGRT	0.0262699
IL12RB1	0.0263469
IGLV3.21	0.0264694
GRAP2	0.0264994
TNFRSF11B	0.026573
IGF2	0.0269184
OGFR	0.0271022
HCK	0.0272843
PSMC2	0.0273754
SSTR1	0.0276821
IGLV2.8	0.0279345
IGLC2	0.0280071
CTF1	0.0280752
S1PR1	0.0281201
LTBP2	0.0281355
SEMA7A	0.0281551
OSGIN1	0.0282027
TRAJ41	0.0282889
DEFB115	0.0283326
IGHV3.23	0.0283601
PSMB8	0.0284273
IGKV1D.33	0.0287282
TMSB4XP8	0.0288252
CD3E	0.0289807
SEMA5B	0.0290407
APOBEC3H	0.0290759
TNFSF4	0.0291502
PLXNC1	0.0292357
ACVR2A	0.0293544
PTPRC	0.0295066
LIMS1	0.0296931
LCK	0.0298353
IFNA4	0.0300113
MARCO	0.0304024
IL20RA	0.0304395
TLR1	0.0305458
ANGPTL2	0.0305781
TRAJ47	0.0307291
TRGV5	0.0307438
TRGJ2	0.0314525
IGHD4.4	0.0314525
IGHD2.21	0.0314525
IGHD3.16	0.0314525
IL10RB	0.0316141
PTHLH	0.0316242
NOD1	0.0323634
LEPR	0.0324135
INHBA	0.0325075
CKLF	0.0325896
SLC11A1	0.0326451
IGHM	0.0330745
PPP4C	0.033077
ESR1	0.0332239
ILK	0.0333559
TGFB2	0.0339267
PSMD5	0.0340693
TRBV7.9	0.0341096
TMSB10	0.0345874
TRAV19	0.0352072
CX3CL1	0.035968
FGF14	0.0360153
TRAV13.1	0.0360367
B2M	0.0361974
BCL3	0.036405
ADRM1	0.0364053
TLR2	0.0367064
KLRC3	0.0367317
TRGC2	0.0370547
RHOA	0.0371478
SORT1	0.0372256
LTBP4	0.0375866
IFNA21	0.0376188
HTR1A	0.0382743
HLA.A	0.0385429
IL22	0.0385759
RBP7	0.0386742
BMP8B	0.0391184
XCL2	0.0391879
SEMA3E	0.0393003
HSPA2	0.0397226
IGHV3.48	0.0397828
TRDD2	0.0398771
APOBEC3G	0.0399665
IGKC	0.0401878
IL33	0.0402202
CXCR6	0.0402764
TRPC4AP	0.0403375
PSMC3	0.04036
PLSCR1	0.0404276
THRB	0.0410616
IL16	0.0410935
IGKV3.20	0.041454
ISG15	0.0417059
NCR3	0.0421139
IGLC3	0.0421301
TRAV8.7	0.0424017
F2RL1	0.0427319
PSME2	0.0433363
PTPN11	0.0435269
IGLV1.44	0.0437367
GDF2	0.0438189
PIK3R1	0.0442854
IREB2	0.0443502
NR1H2	0.0444049
C5	0.0446674
PAK2	0.0449987
PIK3R3	0.045194
SKIV2L	0.0452695
IGHV3.74	0.0455822
CSF1R	0.0456017
IGKV2.24	0.0458811
F2R	0.0461127
CSF2RB	0.0464252
TMSB15B	0.0467407
TRBC2	0.0468932
AP3B1	0.0469494
TNFSF13	0.0470588
PDGFRB	0.047142
IGHV3.33	0.0473344
IFI30	0.047929
IKBKG	0.0479628
TRAV17	0.0480067
VIM	0.0481334
IGLV1.36	0.0484345
TLR8	0.0488716
MX1	0.0491413
TEC	0.0492759
VEGFC	0.0495196
TLR7	0.0495752
PSMC5	0.0497515
HLA.DMA	0.0498236
CXCL16	0.049987
IL13RA1	0.0503452
JUN	0.0506217
HDAC1	0.0510897
CMTM6	0.0511683
PROC	0.0512799
RNASEL	0.051381
TRBV27	0.0516764
IFNG	0.0518504
ITGAL	0.0520465
IRF5	0.0521401
BMP8A	0.0522839
CD40LG	0.0524116
OPRL1	0.0526225
IGLV8.61	0.0527678
IGHV3.66	0.0528367
TRAJ25	0.052892
IGKV1.5	0.0530423
LRSAM1	0.053479
CMTM2	0.0540733
VEGFA	0.0543055
CTSB	0.0543904
BTK	0.0547581
PTPN6	0.0549607
PSMC1	0.0550183
TNFSF14	0.0551792
HLA.F	0.0554056
CCL1	0.0556626
MUC5AC	0.0558099
CD14	0.0559779
IFIH1	0.0560988
TRBV28	0.0561929
PROK1	0.0563331
AQP9	0.0563796
IL1RAP	0.0566161
FGF5	0.0568721
RAC1	0.0569658
IGHV5.51	0.0570503
RARA	0.0574605
IGHV3.53	0.0574934
LYN	0.057841
IGHV1.45	0.057916
NPPC	0.0580868
TRAV24	0.0582947
HLA.C	0.0584017
CBLB	0.0589777
IGHG4	0.0591139
IFNA14	0.0599686
S100Z	0.0600072
IGKV1.16	0.0603366
SRC	0.0608476
IGLV7.43	0.061091
CD3D	0.0611556
GRB2	0.0614946
GDF7	0.0618983
MALT1	0.0622797
FYN	0.0623216
ARRB1	0.0630042
TAPBPL	0.0630582
NRP1	0.0633644
CD48	0.0633652
TRAJ27	0.0641544
BACH2	0.0643377
HSPA4	0.0644158
EDNRA	0.0644528
ITK	0.064902
TRAV8.6	0.0650081
CCR1	0.0652779
RELB	0.0656706
IFNAR1	0.0657552
KLRD1	0.0660483
RORB	0.0662529
ISG20L2	0.0663421
ESRRB	0.0665199
TOR2A	0.0665261
IGHG1	0.066599
ULBP3	0.0666768
IGHV4.31	0.0670112
ELN	0.0676631
IL10RA	0.0676781
IL7R	0.0682724
CD79B	0.0683261
IGHV1.69.2	0.0683266
CD19	0.0684735
TXK	0.068593
IGKV3.15	0.0689812
NOD2	0.0690206
FCGR3A	0.0693535
S100A9	0.0696611
ELAVL1	0.069916
MAPK3	0.0700774
CRLF3	0.0704774
ULBP2	0.0704877
IGHV3.72	0.0705823
C5AR1	0.0709787
IL18R1	0.0711185
IL17RE	0.0711345
IGKV1D.16	0.0713937
IGHV4.59	0.0717891
TNC	0.0723291
KIR3DL1	0.0746588
IL17RC	0.0751132
IGHV1.18	0.0751522
HCST	0.0754084
TANK	0.0754684
SECTM1	0.0755888
CD74	0.0756145
PTAFR	0.0758225
IGKV1.8	0.0761141
BPHL	0.0762047
TRIM27	0.0766648
IGLV1.47	0.076672
HLA.B	0.0767604
TRAV36DV7	0.0770755
IGKV1D.13	0.0774084
FLT3LG	0.0777657
IGHV1.69	0.0778996
NRG1	0.0783304
HLA.E	0.0784513
MSR1	0.0786947
PTGER4	0.0787079
CALCR	0.0789344
PSMD13	0.079264
TRBV5.5	0.080372
IGLV7.46	0.080785
LTB4R2	0.0810695
IGKV2.30	0.0813654
STAT3	0.0819679
LGR6	0.0824773
NOX5	0.0825837
TNFRSF13C	0.0827689
TRBV6.7	0.0836088
TRAV14DV4	0.0840525
TNFRSF17	0.0843004
IGHV3.20	0.0844006
KITLG	0.0849919
CTSS	0.0850433
CCL13	0.0851144
PTK2B	0.0852483
JAG1	0.0853913
DEFB107A	0.0856424
PPARA	0.0856468
PTX3	0.0856977
TRBV4.2	0.0860749
OPRK1	0.0862066
NR6A1	0.0866182
CXCR2	0.0870616
CXCR1	0.087128
CCR8	0.0872306
FPR2	0.0873608
IGLC6	0.0879134
TNFSF15	0.0880218
ARAF	0.0884616
PLAUR	0.0887636
GREM1	0.0894086
GHR	0.0900277
PMCH	0.0904509
CIITA	0.0909273
NFATC2	0.0910789
CCK	0.0913606
GH2	0.0919361
DEFB106A	0.0922619
IGLV10.54	0.0923166
TRBV18	0.0925046
PLCG1	0.0925507
TRBV5.4	0.0931054
RETN	0.0937067
IGKV1.12	0.0942701
SEMA3B	0.0951993
IL1R1	0.0953404
BID	0.0957331
JAK1	0.0962914
RFXANK	0.0963241
ANGPTL1	0.096484
CCR5	0.0967066
DEFB119	0.0973324
FABP2	0.0984271
IGKV4.1	0.0984456
SEMA6B	0.0987372
IGHV4.28	0.0993877
PTGER3	0.0996428
TYMP	0.0996559
RXRB	0.100463
FGF13	0.100468
TNFSF12	0.100476
S100A2	0.100626
TRAJ17	0.10081
HLA.H	0.101016
GDF5	0.101106
ADAR	0.101446
TRGV3	0.101742
TNFRSF10A	0.101868
RXRA	0.102068
CYBB	0.10215
HLA.DRA	0.10263
CCRL2	0.102884
TRBV6.6	0.103286
ADRB1	0.10346
C8G	0.103933
TRAJ37	0.104073
HLA.DOB	0.104123
FSHR	0.104227
IGKV3D.15	0.104829
PSMD7	0.105074
KLRK1	0.105237
MASP1	0.105243
IGLV3.25	0.105255
SDC4	0.105991
IRF1	0.106533
TRBV10.3	0.106765
IGHJ3	0.107074
IGHV3.15	0.107774
IL17RD	0.107917
IGKV6D.21	0.108681
IGHV2.70	0.109193
IGHV3.11	0.109445
TBK1	0.109879
ENDOU	0.110191
NFYC	0.111112
IL27	0.111369
CRHR2	0.112233
HLA.DRB1	0.112625
SLURP1	0.113668
IGKV1.17	0.113988
KLRC1	0.114012
UBR1	0.114274
IGKV3D.20	0.11432
PGRMC2	0.114711
PCSK2	0.115114
SOS1	0.115797
IGHV3.30	0.115994
STAT1	0.116047
PDGFB	0.116134
TRGC1	0.116332
KIR2DL4	0.117019
IGKV2.28	0.117155
CALCRL	0.117287
TRAJ6	0.117314
SEMA4C	0.117444
ACVRL1	0.117548
IGHV1.3	0.117624
IGKV1.6	0.117842
TRBV6.8	0.117935
RASGRP3	0.118619
IFNA16	0.118729
CASP3	0.118788
TRIM22	0.118809
IGLV5.52	0.11964
SLIT2	0.120833
APOBEC3A	0.121026
TNFSF13B	0.121047
IGHV3.49	0.121689
TRBJ2.3	0.122201
IGLV1.40	0.122515
SLC29A3	0.122564
TNFRSF11A	0.122706
IGHV4.4	0.12276
IGKV2D.30	0.123241
DEFB121	0.123729
PPIA	0.124178
BPIFA1	0.124394
PIK3CD	0.125008
TRAV4	0.125366
APOM	0.126303
NR0B2	0.126664
C3	0.127419
SEMA3C	0.127566
IL15RA	0.129288
KLRC2	0.131353
OGN	0.131524
RAF1	0.131597
PSMD4	0.131728
LYZ	0.13176
FGFR2	0.132299
OAS1	0.132534
PSMD6	0.132941
ICOS	0.133914
MAP2K2	0.133993
TUBB3	0.134278
KLRC4	0.135855
TRAV39	0.135864
CD81	0.135903
TRAV12.2	0.135942
TRAV26.1	0.136223
PGC	0.136263
IGKV1.33	0.13636
CCR7	0.138493
PTGER2	0.138663
ACVR1B	0.139764
RAC2	0.139809
FGF11	0.140452
IGLV2.11	0.140463
S100A13	0.141075
PLXNA4	0.141725
HRAS	0.141742
IGKV2D.29	0.141777
FASLG	0.142986
TRAV7	0.143905
CGB1	0.144042
FGF22	0.144392
PRKCB	0.144958
PPBPP1	0.145025
IL4R	0.14503
CCL22	0.145451
NFKBIE	0.145551
OSMR	0.145561
IL6R	0.145648
OXTR	0.145865
SLC40A1	0.146142
SCG2	0.146219
IGLJ4	0.14692
SPINK5	0.147865
HLA.DQA1	0.148173
CD22	0.14842
FGF18	0.148579
PSME1	0.148595
IGKV1D.8	0.148725
IGHV6.1	0.150593
FGF2	0.151491
TRAV16	0.15224
ACKR2	0.15341
IGLV5.45	0.15352
HLA.DPB1	0.15373
CCL4L1	0.154414
IL21	0.154862
BMP2	0.155061
BST2	0.155803
S100A10	0.155904
IGHV3.7	0.156164
AKT3	0.15633
FAM3B	0.156736
TRAV8.4	0.156867
TRAJ28	0.157724
IGHD	0.158067
SP1	0.158851
TRGV4	0.159067
CCL5	0.159738
HLA.DMB	0.160318
PTGDS	0.160333
INSL5	0.160936
TRAV6	0.161224
IL1RL2	0.16136
ACO1	0.161608
BRD8	0.161644
HSP90AA1	0.162014
PLAU	0.162162
RAET1L	0.162461
PDGFRA	0.163017
PIK3CB	0.163325
SYTL1	0.163722
TRAJ46	0.163885
PLTP	0.164553
BECN1	0.164565
RXRG	0.164575
GCGR	0.164798
INPP5D	0.165012
IGKV2D.28	0.165854
FGF21	0.166038
NR3C1	0.166395
SH2D1B	0.166501
TRAV29DV5	0.167013
TRBV25.1	0.167599
TRBV3.1	0.167769
SOD1	0.167956
HSPA8	0.168193
PRLHR	0.168206
RSAD2	0.168658
CYLD	0.169691
SEMA4F	0.170681
IFNL1	0.170822
S100A1	0.171206
CTLA4	0.172128
TRBV2	0.172334
IGF2R	0.172409
NR2C2	0.172562
PROK2	0.17279
IRF9	0.172865
TRHR	0.173882
FABP4	0.174248
CD70	0.175926
TRBV4.1	0.17613
TRDV2	0.176688
FLT4	0.176753
TMSB4Y	0.176811
PLXNB2	0.176966
EIF2AK2	0.177034
IGHV2.5	0.177369
IGKV1D.12	0.177636
GLP2R	0.178026
CACYBP	0.178203
IGLV6.57	0.179099
PSMD1	0.179251
IGF1R	0.18012
EDN3	0.181502
SH2D1A	0.181767
HLA.DQB1	0.182383
NOX1	0.182513
IGKV1.27	0.182614
GDF11	0.183076
IL1F10	0.183644
IGHV3.73	0.184037
VIPR1	0.184345
TSHB	0.184528
PPP3CA	0.184632
CD1E	0.185706
LMBR1L	0.186139
TRDJ4	0.187707
TRBV12.3	0.187835
IGF1	0.188522
TRAJ54	0.188956
IGKJ5	0.189859
RABEP2	0.190245
IGLV4.69	0.19135
PRDX1	0.191492
AEN	0.191971
SHC1	0.192015
IGLV1.50	0.192536
CD247	0.193801
GPHA2	0.194082
TRBV11.1	0.194095
CHGA	0.194496
IL17RA	0.19506
IGHV4.61	0.195782
PLXNB3	0.195843
TYK2	0.196884
GMFB	0.197944
IGKV6.21	0.19868
GNAI1	0.198801
IL18	0.198989
DCK	0.199045
DEFB129	0.199541
PSMD14	0.19977
TRH	0.199789
TRBV19	0.199829
KL	0.199837
TNFRSF14	0.200362
CCL21	0.201451
TRBV30	0.203504
IGKV1D.39	0.20456
IL3RA	0.205566
NFATC1	0.206418
MR1	0.206984
PF4	0.207429
TRAJ12	0.207497
IGHV3.21	0.207923
NPR1	0.208345
NR2C1	0.209254
NEDD4	0.210909
IL13	0.210921
CXCL3	0.211113
TACR1	0.211535
TSLP	0.211975
SEMA4G	0.212927
AIMP1	0.214059
IGLC7	0.214089
NLRX1	0.214955
NMBR	0.214973
INS.IGF2	0.216112
ANGPTL6	0.216359
FGF7	0.216367
IGKV3.7	0.219914
IGLV2.18	0.220193
LHCGR	0.220425
RELA	0.220623
OASL	0.222105
BMP3	0.222253
IGLJ2	0.225173
HTN1	0.225213
ARG2	0.225649
PSMD11	0.227446
CRHR1	0.227959
IGLV4.60	0.228437
GPER1	0.228875
TRBV7.4	0.229704
NFYB	0.230209
EDNRB	0.230313
HLA.DPA1	0.230395
GDF9	0.231464
IL17D	0.231658
PSMC6	0.23171
TRBV5.7	0.232155
CLCF1	0.232516
SLC22A17	0.233134
ANGPTL7	0.233942
ITGB2	0.234395
TRAV20	0.23441
CLDN4	0.234908
PTGDR2	0.235196
NR2F6	0.235551
TNFSF11	0.236187
TRAF3	0.236203
IRF3	0.23647
FAM3D	0.237055
TRAV40	0.237421
S100A16	0.238031
CD40	0.238546
SEMA3F	0.239451
VGF	0.240079
NR1I3	0.240253
CGB8	0.24151
IGHV3.64	0.242557
CXCL10	0.24361
IGLV9.49	0.243848
TNFRSF8	0.244302
TINAGL1	0.24502
TRBV13	0.245991
CXCL5	0.246263
AHNAK	0.24638
TRBV10.2	0.247103
APLNR	0.248511
LAT	0.249659
EPPIN	0.25003
LMBR1	0.250275
RNASE7	0.250923
ZAP70	0.252192
IGHV2.26	0.252293
FCN2	0.252351
PDIA2	0.252806
IGLV3.9	0.252944
CD72	0.253785
IL20	0.253786
SSTR2	0.254108
GUCA2A	0.255167
RBP1	0.255403
TGFB1	0.255654
NCK2	0.255967
CRABP2	0.256044
UCN	0.256607
TNFRSF9	0.257468
PSMD8	0.258241
TFR2	0.258457
VTN	0.259144
RAET1E	0.259531
CSF2RA	0.261457
SEMA6D	0.261839
WFDC2	0.262643
TRBV24.1	0.264976
CMTM8	0.265533
HLA.DOA	0.265593
DEFB125	0.268268
EBI3	0.269465
GH1	0.269738
PTH2	0.269803
IGHV1.58	0.270031
IGHV1.2	0.270776
KDR	0.271005
KIR2DL1	0.271955
NTS	0.272203
FOS	0.272601
IL18RAP	0.273904
NFATC4	0.274526
GSK3B	0.274727
FGA	0.274795
ICAM1	0.275088
SEMA5A	0.275516
FGR	0.275833
TRAJ48	0.276323
AKT1	0.279155
DKK1	0.279555
TRAV13.2	0.280659
IGKV1.37	0.281575
VEGFB	0.282597
PDGFRL	0.282705
IL11RA	0.283737
IKBKE	0.283907
RXFP1	0.28449
CSPG5	0.284906
DEFA4	0.285339
LIF	0.28543
MET	0.285553
TRBV10.1	0.28614
IGKV3D.7	0.286466
AR	0.286945
TNFRSF13B	0.287247
IGKV1.39	0.287322
RAC3	0.288501
IFNA17	0.290933
IL1R2	0.290984
TRDV1	0.291126
DUOX1	0.292387
AGER	0.292988
FGFR3	0.293516
EDN1	0.293888
IL17F	0.295399
PLXNA1	0.295638
CCL15.CCL14	0.297204
ANGPTL3	0.297302
TRAJ44	0.297847
TEK	0.298143
TNFRSF10D	0.298281
TRAJ5	0.299188
NOS2	0.299622
TRAJ59	0.300428
IGLV5.48	0.300734
IGHV3.43	0.301066
HLA.G	0.301954
DEFB106B	0.303028
VDR	0.303209
TRAV3	0.304852
GHRL	0.304903
ADIPOR1	0.307294
MLNR	0.307743
AZU1	0.308009
ITGAV	0.308557
CD320	0.308651
PPP3R1	0.309118
ACKR1	0.30959
PTH2R	0.310314
CCL18	0.311765
IAPP	0.314469
COLEC12	0.315621
NDP	0.315645
UBXN1	0.3161
RLN3	0.316401
OSM	0.316872
CSHL1	0.318767
LTF	0.31902
TRAV22	0.321236
NRG2	0.321413
TGFA	0.32142
NPR3	0.321569
CD1B	0.321712
IGHD1.14	0.325324
IL1RN	0.326121
LCN6	0.326634
CSK	0.326735
HLA.DQA2	0.326873
TG	0.327319
IL12B	0.327504
PDF	0.327948
CCL15	0.329634
CCL4	0.330278
IL6	0.331132
ERAP1	0.331151
TRAJ24	0.331555
TRBV12.4	0.332854
HMGB1	0.333631
TRAV27	0.334069
CALR	0.336831
PCSK1	0.338418
TRAV1.1	0.338639
SEMA3G	0.339027
DCD	0.339735
GIPR	0.340288
PRTN3	0.340422
TDGF1P3	0.341593
MTNR1A	0.341954
GPR32	0.343094
PDYN	0.343976
SYK	0.345562
IL34	0.345776
PPBP	0.345863
TRBJ2.4	0.346869
CREB1	0.347527
BPIFB3	0.347545
LCNL1	0.34755
NR1D1	0.348343
EDN2	0.350664
IL24	0.351463
TRAV18	0.351879
FGF1	0.353299
AGT	0.353501
TLR3	0.354124
NRAS	0.354332
DEFB135	0.356067
IFNK	0.356302
TIE1	0.356608
IGLV3.27	0.356988
TRBV7.6	0.357339
NR4A1	0.358283
DEFA3	0.358313
ROBO1	0.360437
PROCR	0.360774
LTBR	0.361073
CRIM1	0.361831
IFNA13	0.362906
CGB7	0.363358
GPHB5	0.364234
TRGV9	0.365285
NDRG1	0.365963
ANGPT4	0.366508
MMP12	0.368018
ECD	0.369328
NR5A2	0.369359
EPOR	0.370184
TNFAIP3	0.370307
LTBP1	0.370584
NRG4	0.370745
GALP	0.372905
IL2RB	0.373916
SBDS	0.374319
KIR2DL3	0.377003
ESRRG	0.377573
GDF3	0.377635
IGHE	0.378349
IDO1	0.378708
TRAV30	0.379653
PYY	0.381932
PTH1R	0.383014
NR2E3	0.383595
ESR2	0.38381
IFNL3	0.384558
DEFB133	0.385826
AVPR1B	0.386255
HSP90AB1	0.386288
DLL4	0.387309
SDC2	0.388904
DEFB105A	0.389885
IGHV3.35	0.392295
FABP3	0.39273
MANF	0.394774
NR3C2	0.396699
ANGPTL4	0.399321
ISG20	0.399582
AMH	0.401338
PGLYRP4	0.40303
FGF12	0.403609
TRBV15	0.405851
IGHD3.10	0.406064
PDIA3	0.406214
GDF15	0.406658
PRKCQ	0.406988
MBL2	0.407749
PDGFA	0.40864
INS	0.409015
CXCL14	0.40931
PGF	0.410324
GHSR	0.411628
TRAJ29	0.41462
STC1	0.41583
LGR4	0.416219
IL32	0.417715
TSHR	0.417875
MAP2K1	0.417931
FGF4	0.418842
DEFB112	0.422423
FLT3	0.422822
IL26	0.422909
TRAV8.3	0.423918
CD1A	0.429619
LCN2	0.430014
IFNE	0.430176
THBS1	0.431492
IL19	0.432232
BMP6	0.432504
IL20RB	0.433141
IGHD4.17	0.433254
CGB2	0.434873
ICAM2	0.43631
FSHB	0.438108
PDGFD	0.440168
CX3CR1	0.440381
IL3	0.440746
SOS2	0.441151
IGLV3.12	0.441544
TRDC	0.442193
SEMA4D	0.442863
TRAJ14	0.442899
BPIFB2	0.443621
TRAV21	0.443794
IGHV3.13	0.44423
GNRH1	0.444584
ARTN	0.444958
PTK2	0.447005
TRBV29.1	0.44901
SOCS3	0.449633
IGLJ3	0.450984
SSTR5	0.451469
NOX3	0.452355
IL2	0.453053
SEMG2	0.454242
NRG3	0.455762
INHBC	0.455848
FGF19	0.459694
ACKR3	0.460814
GHRHR	0.461068
PPP3R2	0.461239
ADCYAP1R1	0.461897
HSPA1B	0.462355
IFNA1	0.463338
GREM2	0.463937
CCR10	0.464123
PDCD1	0.465504
HBEGF	0.465526
MC4R	0.465531
HLA.DRB5	0.466131
ESM1	0.466351
GHRH	0.46763
INSL3	0.46823
CRLF2	0.469773
NR1D2	0.470708
PIK3CA	0.472641
SERPINA3	0.473708
CLEC11A	0.475248
REG3G	0.475324
JAK2	0.475617
LEFTY2	0.476029
PPP3CB	0.478179
CD86	0.479457
CMTM4	0.479922
IL23R	0.480347
BLNK	0.481229
NGFR	0.481297
CDK4	0.483223
TRAV25	0.48358
PTGS2	0.483944
IFNA8	0.484664
TRAJ53	0.486978
IGKV1D.37	0.487879
RFX5	0.489101
JUND	0.490258
CHP2	0.490378
TRAV35	0.491018
ANGPT1	0.492324
NFAT5	0.494472
CCL14	0.494768
DDX58	0.495556
TCHHL1	0.496256
LCN8	0.496261
TRAJ22	0.498098
INSL4	0.498508
NR2F2	0.498725
GNLY	0.499045
IGLV11.55	0.500095
CHIT1	0.502844
TRGJP2	0.502966
FGF23	0.503127
RETNLB	0.504635
CXCL9	0.505133
SLC10A2	0.506933
ZC3HAV1L	0.507223
ESRRA	0.508472
S100A14	0.509049
CR2	0.509313
PLXNB1	0.509341
IL12RB2	0.50984
IFNW1	0.509957
CSH2	0.510768
CXCL6	0.51116
GMFG	0.512235
PTH	0.513363
LCN12	0.513438
CCL28	0.514044
VAV3	0.51414
TRAV34	0.517937
HRG	0.519919
NFYA	0.520483
ANGPTL5	0.520885
IGKV2D.24	0.521016
RFXAP	0.521546
DEFB4B	0.523358
TRAJ58	0.523648
IL1B	0.524787
DEFB132	0.524964
RABEP1	0.528342
PRKCG	0.529931
PAK1	0.530356
FCGR3B	0.531115
LEP	0.531503
RARG	0.531978
MIF	0.534221
ADM2	0.535663
A2M	0.536729
FGF20	0.537192
TRAV12.3	0.538724
UNC93B1	0.538894
CALCA	0.53899
TPM2	0.5396
IGKV3D.11	0.539886
PI3	0.541978
DEFB127	0.542228
IKBKB	0.542726
HTN3	0.544201
TCF7L2	0.544293
ADM	0.544424
ALB	0.547251
TRDV3	0.547482
CCR3	0.547705
TRDD1	0.547836
GDF6	0.548744
CCL23	0.550602
EPGN	0.550925
CANX	0.554
FGF9	0.555017
KIR3DL2	0.555877
CCL26	0.55646
IRF7	0.557006
GNRHR	0.558252
IGHV3.16	0.559669
LHB	0.562949
R3HDML	0.563573
CSF2	0.563953
AVP	0.56461
LCN1P1	0.565737
TRAV12.1	0.567226
S100B	0.570549
TRAJ23	0.571583
MAPK8	0.572669
ACVR2B	0.573437
IGKV1D.17	0.573572
MICB	0.57732
IGKV2.40	0.577381
GALR2	0.578658
TNF	0.580448
NR4A2	0.580509
TRBJ2.1	0.580993
IL36B	0.582574
CCL25	0.584622
SAA2	0.584857
SHC4	0.58554
NR5A1	0.587215
OBP2B	0.587437
PAK6	0.587512
TRBV6.4	0.588404
OPRM1	0.588743
SAA1	0.588872
KLKB1	0.590011
CYSLTR2	0.591125
S100A12	0.592012
IFNLR1	0.593569
IL1RL1	0.594167
LBP	0.594211
RLN1	0.594395
SEMA4A	0.596735
IL17B	0.597237
TRAJ31	0.599251
SHC3	0.59957
TRAV38.1	0.600715
PAK4	0.601507
SEMA6C	0.604651
PRLH	0.605455
PPP3CC	0.60612
BMPR1B	0.606312
TRAJ1	0.606972
GALR3	0.608432
TRAJ33	0.608445
TRAJ19	0.609507
AGRP	0.61042
FGF8	0.611224
TRAJ34	0.612503
NAMPT	0.613311
IL25	0.614885
MIA	0.615255
INSR	0.617592
DEFA6	0.618239
HNF4G	0.619254
PPBPP2	0.620103
GNRH2	0.620961
CCL16	0.622521
LCN15	0.622753
CGA	0.623675
TFRC	0.623963
BPIFC	0.624016
TNFSF9	0.624123
GDF10	0.624817
ORM2	0.625679
KCNH2	0.625689
DEFB117	0.628172
TRAJ10	0.628232
CHGB	0.629121
DEFA7P	0.630079
OPRD1	0.631106
APLN	0.631838
TRAJ2	0.632221
NPPA	0.633882
NENF	0.634365
IL36G	0.635781
TAC1	0.635999
IFNA5	0.636937
FLT1	0.638124
POMC	0.638282
HSPA5	0.64093
NR2E1	0.641196
IGLV2.33	0.641436
CTSG	0.641601
NTF3	0.641805
TRAJ56	0.642454
INHBE	0.643781
BMPR1A	0.644291
CNTF	0.64579
TRAV5	0.646596
TRAV26.2	0.646898
HSPA6	0.648247
IGHV7.81	0.650571
IGHV3.38	0.651146
IL17A	0.652008
BPIFB1	0.652863
PLA2G2A	0.653195
PAK3	0.654601
MPO	0.655419
TRAV8.2	0.655818
OLR1	0.657222
SFTPA1	0.657261
MASP2	0.659005
ELANE	0.659768
ACKR4	0.661427
OBP2A	0.663884
CCL17	0.669405
IL31	0.675689
TRAV41	0.675847
NFKBIA	0.676271
BIRC5	0.676689
TRAJ38	0.677877
CRABP1	0.678189
DEFB113	0.679764
HTR3A	0.680346
RBP5	0.684488
IL15	0.686071
NRP2	0.686843
SCGB3A1	0.68757
BMP5	0.689146
BMP10	0.689766
CHUK	0.691686
TRAJ8	0.691868
FAM3C	0.692937
IGHJ2	0.693058
UMODL1	0.696252
RXFP3	0.696775
IFNB1	0.69687
TPT1	0.697794
IGLV3.32	0.699162
SERPIND1	0.702856
LRP1	0.70388
IGLV3.16	0.704365
RARB	0.704608
CCL3	0.704959
NR0B1	0.705089
NCK1	0.708784
BPIFA3	0.70955
IGHD1.26	0.710246
IL17RB	0.710421
FIGNL2	0.711662
IL5	0.711916
IFNA10	0.712418
AMHR2	0.714745
EREG	0.715068
TRAJ20	0.715346
CRP	0.715815
TRDJ3	0.717452
NRTN	0.717981
ZC3HAV1	0.718638
HTR3D	0.719815
TRAJ57	0.720928
CSH1	0.721293
TRBV5.6	0.7217
CD1C	0.722745
TRAJ61	0.722829
VAV2	0.724248
IL5RA	0.726165
LGR5	0.726404
CXCL17	0.726938
TRAJ43	0.726953
CMA1	0.727076
ADIPOQ	0.727373
TRDJ2	0.727468
FGF16	0.727625
NCR1	0.728605
PMP2	0.729737
MBL3P	0.730034
IL37	0.730475
CXCR4	0.732121
KIR3DL3	0.734768
SLIT1	0.73648
RBP2	0.737341
GPI	0.740243
DEFB126	0.74098
CCL7	0.741317
THPO	0.741487
GRP	0.742092
TNFSF18	0.742547
VIP	0.745417
FABP7	0.745437
DEFB104A	0.745681
IL12A	0.745905
TRAV23DV6	0.746974
HAMP	0.748096
NOX4	0.748551
FGFR4	0.750336
S100A7A	0.750391
NODAL	0.751558
SPAG11A	0.752006
BRAF	0.753765
GKN1	0.753997
CAMP	0.754152
IGKV1D.43	0.755176
TRAJ49	0.756043
TRAJ11	0.75799
CCL20	0.758664
TRAJ26	0.758841
TRBJ2.7	0.760916
TDGF1	0.761843
DEFB103B	0.764429
C5AR2	0.765447
TRBV12.5	0.765785
BMP4	0.7662
FURIN	0.766617
CLEC4M	0.767355
DES	0.769991
NR1H4	0.770932
RN7SL1	0.771733
DDX17	0.774881
LPA	0.775643
TRAJ7	0.776912
PRDX2	0.777735
DEFB108B	0.777784
TNFRSF25	0.778185
GLP1R	0.778713
DEFB110	0.779087
AMELX	0.779675
LEFTY1	0.780317
MPL	0.781391
FGF17	0.78166
OSTN	0.782353
TRBV11.2	0.78537
IFNA2	0.785927
IGLV4.3	0.786643
TRBV16	0.787357
LALBA	0.788593
IGLV3.22	0.790228
PENK	0.790581
MAPT	0.793004
SEMA4B	0.793324
CST4	0.793675
REG1A	0.794421
AVPR1A	0.796396
HTR3C	0.798649
NMB	0.799127
FGFR1	0.799887
TRAV9.1	0.800213
UCN2	0.802764
HDGF	0.803785
IFNL2	0.804674
CD28	0.807225
KNG1	0.807415
BMP1	0.80787
CRLF1	0.809181
OXT	0.809267
PPY	0.809542
RORC	0.809886
GPR33	0.810497
TRAJ40	0.811193
LECT2	0.81171
TNFRSF18	0.813022
PGLYRP2	0.813127
S100A7L2	0.813818
MCHR2	0.815312
DEFB118	0.815545
AMBN	0.815929
BPIFA2	0.816192
MUC4	0.817417
LACRT	0.818614
PGLYRP1	0.819174
TRBV5.1	0.820058
TNFRSF10B	0.822156
CCR6	0.822341
ABCC4	0.822813
DEFB136	0.823459
NPPB	0.824402
DEFB1	0.826438
DEFB134	0.82813
CER1	0.831351
NPY	0.832064
TRAJ9	0.834825
IL17C	0.838686
IL36A	0.839073
GIP	0.840094
TRAJ35	0.842358
XCL1	0.842617
GPR17	0.842658
HTR3B	0.843064
CD1D	0.843357
NOS1	0.843619
AGTR2	0.845718
IFNA7	0.846956
IGKV1D.42	0.847957
DMBT1	0.84847
NTF4	0.848961
IGKV2D.40	0.849727
CXCL2	0.850703
IL4	0.85111
IL11	0.851496
SLPI	0.852099
TRAJ16	0.852753
IGLV5.37	0.853557
SHC2	0.853636
CCL24	0.854538
GDNF	0.854704
TRAJ52	0.857012
CCL3L3	0.858559
CNTFR	0.858844
TMSB15A	0.859374
CXCL1	0.859476
CXCR5	0.860032
FABP12	0.860148
LIFR	0.860611
ORM1	0.862287
IGHD6.25	0.862717
EPO	0.863253
NFKBIZ	0.863937
FABP5	0.86473
NCR2	0.865786
IL22RA2	0.867977
FGF3	0.869175
UCN3	0.871438
MLN	0.872268
TNFRSF4	0.872514
TRAJ4	0.873939
CCL19	0.8749
FGF6	0.875118
TRAJ36	0.87575
PGLYRP3	0.875888
S100G	0.877307
IL23A	0.878556
DEFB104B	0.881095
LCN1	0.881617
TRAV8.1	0.882882
RORA	0.883148
TRAV10	0.883224
IL21R	0.885218
CELA1	0.885546
IGHD6.13	0.886892
NR1I2	0.886986
INHA	0.889001
BDNF	0.889461
TRGJP1	0.889484
DEFB116	0.891347
TRAJ3	0.892009
S100P	0.892366
ULBP1	0.893492
EGF	0.893919
CBL	0.893928
SEMA3D	0.893974
RXFP2	0.894177
TRBV11.3	0.895145
HNF4A	0.896328
TRGV2	0.896826
MYDGF	0.898675
BPIFB6	0.89925
NGF	0.901063
ACTA1	0.90242
IL1A	0.903089
STAB2	0.90397
AZGP1	0.905352
IGHD2.15	0.907113
CCR9	0.907487
HTR3E	0.907871
INHBB	0.908091
IGKV5.2	0.910214
TRAJ18	0.910874
PRKCA	0.911276
MC2R	0.911817
TRAJ13	0.911851
CMTM5	0.91202
UTS2	0.912437
IL9R	0.913188
SCT	0.913374
APOH	0.91454
CDNF	0.915467
CRH	0.91568
IL36RN	0.915724
IL22RA1	0.918029
BTC	0.918524
DEFB107B	0.919476
TRBV7.7	0.921619
PDGFC	0.922922
DEFB124	0.923501
BPIFB4	0.924214
DEFB123	0.928194
SST	0.929611
CALCB	0.930248
HSPA1A	0.931585
IGKV6D.41	0.932096
CXCL8	0.934295
PF4V1	0.934423
SCTR	0.934454
APOD	0.934804
ROBO2	0.936673
GFAP	0.937627
PTGER1	0.937723
TRBJ2.2	0.939656
TRAJ45	0.942558
MAP3K8	0.944838
INSL6	0.945023
LEAP2	0.945186
PLXNA3	0.945241
EED	0.945644
CTSE	0.946665
ROBO3	0.94697
DEFB4A	0.949467
SFTPD	0.950817
AREG	0.951094
PI15	0.952217
BMPR2	0.955488
CBLC	0.955675
TRAJ42	0.955935
VIPR2	0.956384
SEMG1	0.957153
CDH1	0.958535
PAEP	0.958947
NR4A3	0.959294
FABP9	0.96278
TRAJ30	0.963619
MMP9	0.963872
RBP4	0.964798
LTBP3	0.966372
MSTN	0.966906
ACVR1C	0.969775
RNASE3	0.971298
PNOC	0.971686
IL9	0.971945
KIR2DS4	0.973323
TRAJ39	0.97372
RLN2	0.976198
BMP7	0.977811
CSF3	0.978439
GAST	0.978767
SFTPA2	0.979683
TRBV6.1	0.982049
SPP1	0.982938
DUOX2	0.983381
MCHR1	0.983466
S100A7	0.984807
CGB5	0.985887
PRL	0.986661
LANCL1	0.986809
PGR	0.987138
CD244	0.987539
TGFB3	0.987989
UTS2B	0.990166
IFNA6	0.991284
CCL11	0.993394
MC3R	0.993549
DEFB114	0.993995
FGF10	0.994405
LCN9	0.994645
IGLJ1	0.99535
IGKV1.13	0.996292
IGHD3.22	0.996738
DEFB103A	0.997098
IGHD3.3	0.997259
LCN10	0.99726
IGHD1.1	0.997382
IGHD5.12	0.997382
IGHD3.9	0.997382
IGHD2.2	0.997382
IGHD4.23	0.997382
IGHD2.8	0.997413
DEFB105B	0.99743
IGLJ7	0.997515
IGHJ1	0.997678
IGLJ5	0.997956
CCL27	NA
DEFA1	NA
DEFA1B	NA
GDF1	NA
IGHD1.20	NA
IGHD4.11	NA
IGHD5.18	NA
IGHD5.24	NA
IGHD5.5	NA
IGHD6.19	NA
IGHD6.6	NA
IGHD7.27	NA
IGHJ4	NA
IGHJ5	NA
IGHJ6	NA
IGKJ1	NA
IGKJ2	NA
IGKJ3	NA
IGKJ4	NA
IGLC1	NA
NPFF	NA
TNFRSF6B	NA
TRAJ32	NA
TRAJ50	NA
TRAV38.2DV8	NA
TRBJ2.5	NA
TRBJ2.6	NA
TRDD3	NA
TRDJ1	NA
TRGJ1	NA
TRGJP	NA
TRGV8	NA
