# Supplementary material for: Development of an immune-related signature for predicting survival outcome and immunotherapy response in osteosarcoma
Source: Aging (Albany NY). 2021 Nov 8;13(21):24155–70. doi: 10.18632/aging.203671 (PMC8610143; doi:10.18632/aging.203671)
Supplement: Supplementary Tables 4-8 [file aging-13-203671-s004.xlsx]

## Sheet: Supplementary Table 4
Supplementary Table 4. Clinical features and immunotherapy information of advanced urothelial cancer cohort.
Sample ID	Sex	Baseline ECOG score	Immune phenotype	Tobacco use history	Received platinum	RECIST	Mutation counts	Neoantigen load	OS (months)	Surviavl status	Risk score
SAM4918c524b83a	Male	2	Desert	Current	No	NE	14	NA	0.62423	Alive	-3.51211
SAM80c6183220e6	Male	0	Inflamed	Current	No	PD	8	0.215686	14.7515	Alive	-6.69121
SAM58e7832f4e7d	Male	1	Desert	Never	No	PR	2	0.333333	16.46	Alive	-3.0396
SAMd027124354ce	Female	0	Desert	Never	No	CR	4	0.764706	23.5236	Alive	-5.886
SAM9725303dce0c	Male	1	Desert	Never	No	PD	22	4.43137	8.90349	Alive	-8.3121
SAMaec7380f9ab0	Male	2	Excluded	Never	No	PR	4	NA	20.8624	Alive	-8.8082
SAM31d9176e11fb	Male	0	Inflamed	Never	No	CR	23	4.23529	17.117	Alive	-8.65837
SAM3a1c9632ff7b	Male	0	Unknown	Never	No	SD	NA	NA	16.0329	Alive	-4.71333
SAM6f2a102a99df	Female	1	Unknown	Never	No	CR	8	2.07843	19.2854	Alive	-5.35236
SAM04c589eb3fb3	Male	2	Unknown	Never	No	NE	50	NA	0.689938	Alive	-8.45929
SAM7b40007f4aa4	Female	1	Unknown	Never	No	PR	12	NA	21.6509	Alive	-10.0412
SAM6157c8f38b72	Male	0	Desert	Previous	No	PR	9	1.80392	16.5914	Alive	-4.88353
SAM7edacb3deb65	Male	1	Desert	Previous	No	NE	NA	0.647059	18.0041	Alive	-5.53832
SAM14938611a2d3	Male	2	Desert	Previous	No	PR	38	6.68627	21.4209	Alive	-6.22159
SAMdab9ca8fb5de	Male	2	Excluded	Previous	No	PD	14	2.92157	0.197125	Alive	-2.05527
SAM8b4b8b0f9e73	Male	0	Excluded	Previous	No	SD	7	1	15.6715	Alive	-4.41494
SAM6ff654a20f98	Male	0	Excluded	Previous	No	CR	6	1.03922	18.5626	Alive	-5.14342
SAMd35318127278	Male	1	Excluded	Previous	No	CR	62	10.0196	21.5852	Alive	-5.48017
SAM73663ee4a96e	Male	0	Excluded	Previous	No	CR	NA	NA	21.2567	Alive	-6.32017
SAM1abf01dd4544	Male	2	Excluded	Previous	No	PR	16	1.86275	16.8542	Alive	-7.20493
SAM07a93a28f801	Male	1	Excluded	Previous	No	PR	18	2.11765	12.846	Alive	-7.4068
SAM4caabd64e7fd	Male	1	Excluded	Previous	No	PR	59	11.6863	15.7043	Alive	-7.47565
SAM97a00e0929fb	Male	0	Excluded	Previous	No	PR	18	2.86275	12.7146	Alive	-7.84924
SAM572f19794c96	Male	1	Excluded	Previous	No	CR	33	5.5098	16.8214	Alive	-8.11613
SAM1bcc62d8290c	Male	1	Excluded	Previous	No	NE	10	1.4902	18.6283	Alive	-8.93176
SAM7538ad9ff524	Female	1	Inflamed	Previous	No	SD	21	2.39216	19.1211	Alive	-3.32709
SAM6662f5181f87	Male	0	Inflamed	Previous	No	PD	5	0.490196	19.2854	Alive	-5.60747
SAM47fc46c3d6be	Male	0	Inflamed	Previous	No	SD	8	0.803922	18.7269	Alive	-5.73298
SAMaf42c1541269	Male	1	Inflamed	Previous	No	SD	14	2.19608	5.51951	Alive	-5.95807
SAMcc7a42d87e9c	Female	1	Inflamed	Previous	No	PR	26	4.96078	17.2156	Alive	-7.23778
SAMeb587a68006b	Male	1	Unknown	Previous	No	SD	NA	NA	20.6982	Alive	-3.76034
SAM727c0e92a2a7	Male	0	Unknown	Previous	No	PR	1	0.333333	18.7269	Alive	-4.14739
SAMa9ca8536d2b1	Male	0	Unknown	Previous	No	SD	3	0.352941	21.848	Alive	-4.73193
SAMda4d892fddc8	Male	0	Unknown	Previous	No	PD	4	0.27451	14.1273	Alive	-6.97154
SAM0684af734db1	Female	1	Unknown	Previous	No	PR	6	0.921569	23.2608	Alive	-7.95451
SAM9daccafc18db	Female	0	Desert	Current	Yes	PD	NA	NA	16.46	Alive	-0.478946
SAM08cce2fa88f2	Female	1	Excluded	Current	Yes	SD	NA	NA	22.1109	Alive	-4.93782
SAM6d2ae0c39b96	Male	1	Excluded	Current	Yes	PD	NA	NA	22.1109	Alive	-7.02788
SAM7d7c54623618	Male	0	Excluded	Current	Yes	PR	8	2.09804	21.2238	Alive	-8.17854
SAM203dcf14f927	Male	1	Inflamed	Current	Yes	CR	13	2.39216	19.3511	Alive	-4.85267
SAM2570ff4aae6e	Female	1	Inflamed	Current	Yes	PR	12	1.52941	22.3737	Alive	-4.94187
SAM1f66db567eb5	Male	2	Inflamed	Current	Yes	PR	38	4.5098	16.5914	Alive	-6.47997
SAM1fa6bcb7fc48	Male	1	Inflamed	Current	Yes	PD	8	1.23529	22.7351	Alive	-7.53975
SAMe07c4560772d	Female	1	Desert	Never	Yes	PD	5	0.54902	2.10267	Alive	-5.12948
SAMfed609955db9	Female	0	Desert	Never	Yes	PD	7	0.352941	20.5667	Alive	-5.30983
SAM8f2275c36e8c	Male	0	Desert	Never	Yes	SD	5	NA	20.731	Alive	-7.00508
SAM548551ef782c	Male	1	Desert	Never	Yes	PR	11	1.82353	17.2813	Alive	-7.07459
SAM8a1b0e02ee42	Male	0	Desert	Never	Yes	CR	14	0.843137	20.5667	Alive	-7.71367
SAMba7176afe070	Female	0	Excluded	Never	Yes	PD	5	NA	3.44969	Alive	-3.30386
SAM3e04eb914f3d	Male	1	Excluded	Never	Yes	PR	17	1.41176	17.2813	Alive	-3.45644
SAMe9475f77504b	Male	0	Excluded	Never	Yes	SD	NA	NA	18.6612	Alive	-4.37969
SAMc2a1820d4e6b	Male	0	Excluded	Never	Yes	CR	NA	NA	20.731	Alive	-4.85394
SAM7fb6987514a4	Male	0	Excluded	Never	Yes	PD	1	NA	22.8337	Alive	-4.89265
SAM3b1066e5801b	Male	1	Excluded	Never	Yes	SD	2	0.176471	15.6386	Alive	-4.89789
SAM670649e105b5	Female	0	Excluded	Never	Yes	CR	15	2.68627	22.078	Alive	-5.22176
SAM681e4bf7cf85	Male	0	Excluded	Never	Yes	PR	7	1.86275	23.3922	Alive	-5.719
SAMb470eb8f04be	Male	0	Excluded	Never	Yes	CR	35	NA	20.0739	Alive	-6.49578
SAM27299aed7681	Female	0	Excluded	Never	Yes	PR	8	0.745098	18.8583	Alive	-6.69121
SAM36d87392593b	Male	0	Excluded	Never	Yes	SD	7	0.352941	23.6879	Alive	-6.93337
SAM5767dd75d142	Male	1	Excluded	Never	Yes	PR	32	NA	18.1684	Alive	-7.10458
SAM075e037d95bc	Male	0	Excluded	Never	Yes	PR	11	0.745098	21.3224	Alive	-8.45929
SAM771445e92421	Male	0	Inflamed	Never	Yes	CR	NA	0.215686	19.4168	Alive	-3.83944
SAMc919aebc7fdd	Male	0	Inflamed	Never	Yes	PR	3	0.607843	20.731	Alive	-5.85764
SAMcabb6d58ff55	Female	1	Inflamed	Never	Yes	SD	11	1.35294	20.271	Alive	-6.45272
SAM8884fe446d20	Male	1	Inflamed	Never	Yes	PR	13	6	23.1622	Alive	-6.70033
SAM9306c5c92444	Male	1	Inflamed	Never	Yes	PD	12	2.23529	15.4415	Alive	-7.05105
SAM3b15b4c6311d	Male	1	Inflamed	Never	Yes	CR	44	5.82353	21.4538	Alive	-7.42939
SAMd215b503f99a	Male	1	Unknown	Never	Yes	SD	NA	NA	1.70842	Alive	-3.9894
SAM716f54e468f4	Male	1	Unknown	Never	Yes	SD	6	1.56863	21.191	Alive	-4.07734
SAM3330c03fdf00	Male	0	Unknown	Never	Yes	PD	2	NA	19.1869	Alive	-5.00409
SAM34430ef08e5b	Male	0	Unknown	Never	Yes	PD	NA	NA	18.1684	Alive	-5.21357
SAM4581bac493af	Male	0	Unknown	Never	Yes	NE	16	3	20.0411	Alive	-6.7659
SAM25510f300d79	Male	0	Desert	Previous	Yes	CR	NA	1.82353	20.6982	Alive	-3.47492
SAMc97f35a29d16	Male	1	Desert	Previous	Yes	NE	13	NA	0.821355	Alive	-4.68814
SAM1dda30f1c5be	Male	0	Desert	Previous	Yes	PD	20	4.01961	21.2567	Alive	-5.71206
SAM6cb230f208a8	Male	0	Desert	Previous	Yes	PR	20	1.03922	23.2279	Alive	-6.18911
SAMe712352fb82a	Male	0	Desert	Previous	Yes	PR	NA	NA	22.1109	Alive	-6.30616
SAM822b226466a1	Male	1	Desert	Previous	Yes	SD	NA	1.09804	17.2813	Alive	-6.52792
SAMb3c02294aba7	Male	1	Desert	Previous	Yes	PR	18	NA	22.4066	Alive	-7.62409
SAMe50d15fde368	Female	1	Desert	Previous	Yes	PR	9	2.17647	18.8912	Alive	-8.8082
SAMf275eb859a39	Male	0	Excluded	Previous	Yes	PR	9	NA	24.4764	Alive	-2.2176
SAMbf1a3ae828e6	Male	0	Excluded	Previous	Yes	CR	35	3.7451	20.731	Alive	-2.84167
SAMd3bd67996035	Male	0	Excluded	Previous	Yes	CR	7	1.56863	20.8296	Alive	-3.281
SAM3894ac3956a5	Male	0	Excluded	Previous	Yes	PD	5	NA	2.10267	Alive	-3.73315
SAMf3a9bce50099	Female	1	Excluded	Previous	Yes	PD	4	NA	2.10267	Alive	-4.6108
SAMd3601288319e	Male	0	Excluded	Previous	Yes	CR	14	0.784314	23.1294	Alive	-4.74249
SAMd5ab7fbfab4e	Male	0	Excluded	Previous	Yes	NE	35	4.64706	18.1027	Alive	-5.42616
SAM14df63a65411	Female	0	Excluded	Previous	Yes	PR	7	0.568627	21.4209	Alive	-5.56308
SAM52500cabdd36	Female	0	Excluded	Previous	Yes	SD	12	0.745098	20.4682	Alive	-5.66662
SAMa321770ac31c	Male	0	Excluded	Previous	Yes	PD	8	1.41176	7.06366	Alive	-5.8834
SAMaaf505c36f93	Male	1	Excluded	Previous	Yes	PR	15	1.72549	20.5667	Alive	-5.89907
SAMb419a8fcbfcd	Male	1	Excluded	Previous	Yes	PR	19	NA	22.7351	Alive	-7.3128
SAMc1251c7bfee2	Male	0	Excluded	Previous	Yes	PR	5	1.09804	21.6181	Alive	-7.74167
SAMc1b27bc16435	Male	0	Excluded	Previous	Yes	PR	5	1.41176	24.1807	Alive	-8.24378
SAMe1eb5d988760	Male	0	Inflamed	Previous	Yes	CR	14	2.27451	21.0595	Alive	-1.12597
SAM36a9225b0222	Male	1	Inflamed	Previous	Yes	SD	1	0.607843	23.8193	Alive	-3.20027
SAM065890737112	Male	0	Inflamed	Previous	Yes	CR	8	NA	20.0739	Alive	-3.61948
SAMd43f8933066b	Male	0	Inflamed	Previous	Yes	PR	15	1.88235	20.0082	Alive	-3.7402
SAM75f12d1a55fc	Male	0	Inflamed	Previous	Yes	SD	6	0.333333	14.7515	Alive	-3.93115
SAM28687037e4ff	Male	0	Inflamed	Previous	Yes	SD	6	0.568627	21.5852	Alive	-4.48027
SAMd7d57ee3a863	Male	1	Inflamed	Previous	Yes	CR	24	NA	20.271	Alive	-4.76986
SAM2eb07dedf07f	Male	0	Inflamed	Previous	Yes	PR	13	1.13725	20.501	Alive	-6.1827
SAMeaa477a5384b	Male	0	Inflamed	Previous	Yes	CR	14	2.76471	21.5852	Alive	-6.49976
SAMbda79f955628	Female	1	Inflamed	Previous	Yes	SD	20	1.2549	20.6324	Alive	-6.79984
SAM6083aac8db99	Male	0	Inflamed	Previous	Yes	PR	14	NA	20.6324	Alive	-6.97154
SAM61b9d4d84c64	Male	1	Inflamed	Previous	Yes	SD	27	5.88235	21.3881	Alive	-7.15388
SAMfb7aec7cb0e2	Male	1	Inflamed	Previous	Yes	PR	NA	5.92157	22.538	Alive	-8.02158
SAM560f23d6a3ad	Male	0	Inflamed	Previous	Yes	CR	19	0.647059	21.3881	Alive	-8.73134
SAMa535fcdf18a0	Male	1	Unknown	Previous	Yes	PR	19	0.882353	17.2813	Alive	-5.14653
SAMad83c9c53537	Male	0	Unknown	Previous	Yes	PD	6	0.745098	14.9815	Alive	-5.2873
SAMb15ac6e4c4ef	Male	0	Unknown	Previous	Yes	PR	11	1.5098	20.0082	Alive	-5.32563
SAMb0a83e5fbde9	Male	1	Unknown	Previous	Yes	SD	7	0.352941	23.3265	Alive	-5.76136
SAM62fb1388c871	Female	0	Unknown	Previous	Yes	PD	5	0.784314	22.5051	Alive	-5.76614
SAM5cfa1699bdb7	Male	0	Unknown	Previous	Yes	PD	10	1.21569	15.8357	Alive	-5.8808
SAM2e9ac0b1b250	Male	1	Unknown	Previous	Yes	CR	18	1.76471	22.1437	Alive	-6.69576
SAMe3d4266775a9	Male	0	Unknown	Previous	Yes	PD	NA	NA	13.9959	Alive	-7.2714
SAM65afda25b920	Male	2	Excluded	Current	No	SD	4	0.294118	8.08214	Dead	-4.97196
SAM7fb7a13c096b	Male	2	Excluded	Current	No	PD	11	0.764706	1.67556	Dead	-6.18911
SAM2b672f4336c7	Male	0	Desert	Never	No	SD	2	0.156863	15.3101	Dead	-6.28885
SAM5cc2d9036053	Male	1	Desert	Never	No	PD	11	0.411765	5.68378	Dead	-6.95506
SAM1f83ebd6be9b	Male	1	Desert	Never	No	PD	6	0.54902	3.5154	Dead	-7.56454
SAM87a8e18eb45b	Female	2	Excluded	Never	No	PD	14	0.313725	2.75975	Dead	-2.01806
SAM17c45bf16bb6	Male	0	Excluded	Never	No	NE	5	0.431373	2.69405	Dead	-4.17337
SAMe56c96c51190	Female	2	Excluded	Never	No	PD	5	0.0980392	9.7577	Dead	-4.73193
SAM94859b440b1d	Male	1	Excluded	Never	No	PD	11	0.215686	13.3388	Dead	-7.27822
SAM76a431ba6ce1	Male	0	Inflamed	Never	No	PD	6	0.215686	14.1273	Dead	-4.34259
SAMaabf4afe4213	Male	1	Unknown	Never	No	PD	18	2	2.62834	Dead	-4.89265
SAMe9ae8beb82fa	Male	1	Desert	Previous	No	PD	7	1.33333	5.48665	Dead	-3.89076
SAM1ab1b28d9f2b	Female	1	Desert	Previous	No	PD	13	0.294118	2.10267	Dead	-4.72143
SAM9fb814c22bdb	Female	0	Desert	Previous	No	SD	6	0.431373	19.1211	Dead	-4.91108
SAM6792d6e98068	Male	2	Desert	Previous	No	PD	17	1.11765	6.01232	Dead	-7.34107
SAMbc8dc3a7b54e	Female	1	Desert	Previous	No	PD	7	0.745098	14.7515	Dead	-9.50494
SAM1ac4e3dee297	Male	1	Excluded	Previous	No	PD	2	0.647059	5.51951	Dead	-3.66121
SAM0f956e757453	Male	1	Excluded	Previous	No	PD	32	4.09804	10.4148	Dead	-3.89927
SAMc6eff056c89a	Male	1	Excluded	Previous	No	PD	3	0.45098	1.80698	Dead	-4.62268
SAM26104d5adc89	Male	1	Excluded	Previous	No	SD	1	0.27451	5.38809	Dead	-4.76267
SAM2e7aa8fa0ab3	Male	1	Excluded	Previous	No	PD	14	2.70588	7.72074	Dead	-4.90447
SAMe0c49ea0df5d	Female	1	Excluded	Previous	No	SD	2	NA	4.13963	Dead	-5.06911
SAM7aa01fc49a80	Male	1	Excluded	Previous	No	PD	NA	1.03922	2.13552	Dead	-5.31157
SAMd4c0837b0997	Male	0	Excluded	Previous	No	PD	5	0.529412	5.38809	Dead	-5.3999
SAM59289ca42c99	Male	0	Excluded	Previous	No	NE	4	0.235294	1.70842	Dead	-6.16996
SAM1f3c93814cb9	Female	2	Excluded	Previous	No	NE	5	1.13725	1.44559	Dead	-6.25483
SAM1a87df750b9d	Male	2	Excluded	Previous	No	SD	8	1.17647	5.38809	Dead	-7.32687
SAMef0e3d2415fd	Male	0	Inflamed	Previous	No	SD	1	0.0392157	10.1191	Dead	-4.1966
SAMe7bf6c015192	Male	1	Inflamed	Previous	No	PD	7	1.37255	3.12115	Dead	-4.44148
SAM18b9351e265a	Male	2	Inflamed	Previous	No	PD	7	0.392157	15.8686	Dead	-5.36138
SAM7829a341b9f3	Male	1	Inflamed	Previous	No	PD	3	0.745098	3.8768	Dead	-6.78035
SAMe7e4f7c076a7	Male	1	Inflamed	Previous	No	PD	1	0.196078	1.97125	Dead	-6.86506
SAM5fc9ae0aed1f	Male	2	Inflamed	Previous	No	NE	6	2.01961	0.62423	Dead	-7.53158
SAM85e41e7f33f9	Male	2	Inflamed	Previous	No	NE	10	1.2549	0.62423	Dead	-7.76064
SAMb8101c538753	Male	1	Inflamed	Previous	No	SD	16	3.76471	13.4045	Dead	-7.77986
SAMce39dd79b441	Male	0	Inflamed	Previous	No	PD	14	0.843137	6.27515	Dead	-9.13953
SAMa0ca029b7afd	Male	1	Unknown	Previous	No	NE	12	0.745098	0.361396	Dead	-4.09529
SAMbe25e2c88f3e	Male	2	Unknown	Previous	No	NE	NA	NA	2.92402	Dead	-5.561
SAM18bc1078bc15	Male	1	Unknown	Previous	No	PD	19	1.80392	6.89938	Dead	-6.63762
SAM81b71522417a	Female	0	Unknown	Previous	No	PD	7	1.07843	2.13552	Dead	-6.70492
SAM6964a6d7b967	Male	1	Unknown	Previous	No	PD	5	1.17647	16.2628	Dead	-9.38235
SAM63b2189c36d7	Male	1	Desert	Current	Yes	PD	14	0.980392	3.97536	Dead	-2.34557
SAM8e8ef2368dfa	Male	0	Desert	Current	Yes	PD	6	0.509804	4.50103	Dead	-3.68366
SAMcb132b0cdd2c	Male	1	Desert	Current	Yes	PD	NA	0.843137	2.52977	Dead	-4.73896
SAMf82bbdc267c8	Male	0	Desert	Current	Yes	PD	7	0.529412	3.12115	Dead	-5.74474
SAM3ee5dcd894f0	Male	0	Desert	Current	Yes	PD	NA	NA	8.70637	Dead	-7.29887
SAM0d855cff64e6	Female	1	Desert	Current	Yes	PD	4	0.137255	2.85832	Dead	-7.52346
SAM28e6031ac18b	Male	1	Desert	Current	Yes	SD	22	NA	9.23203	Dead	-8.24378
SAMdad5c29dc105	Male	1	Excluded	Current	Yes	PD	5	0.666667	2.43121	Dead	-3.6391
SAM181b638b8248	Male	1	Excluded	Current	Yes	PD	NA	0.215686	10.8747	Dead	-4.41965
SAM3cb94b0d5297	Male	1	Excluded	Current	Yes	PD	15	2.23529	5.05955	Dead	-4.50405
SAM3779e979db6b	Male	0	Excluded	Current	Yes	NE	NA	NA	1.31417	Dead	-4.55075
SAM978a587b207e	Male	0	Excluded	Current	Yes	PD	NA	1.92157	2.10267	Dead	-4.57154
SAM85f0a3ac1c45	Male	1	Excluded	Current	Yes	PD	8	0.27451	5.84805	Dead	-4.70871
SAMb963dda93cfd	Male	1	Excluded	Current	Yes	PD	8	0.882353	2.75975	Dead	-5.00834
SAMbfdffb97c446	Female	1	Excluded	Current	Yes	SD	6	1.45098	6.70226	Dead	-5.05149
SAM753d4bb52dbe	Male	1	Excluded	Current	Yes	SD	7	NA	11.3676	Dead	-5.19409
SAMdb3f50c9129c	Male	1	Excluded	Current	Yes	PD	10	0.509804	15.8029	Dead	-5.20056
SAM961d04c42bd9	Male	1	Excluded	Current	Yes	PD	17	1.72549	5.8809	Dead	-5.7903
SAM7d2dfba6cd84	Male	0	Inflamed	Current	Yes	SD	4	0.156863	12.7146	Dead	-3.85783
SAM31291c256373	Male	1	Inflamed	Current	Yes	NE	32	3.21569	1.1499	Dead	-4.414
SAM5fe7a81a39dd	Male	0	Inflamed	Current	Yes	PD	21	3.82353	17.0842	Dead	-5.20542
SAMae1690469964	Male	0	Unknown	Current	Yes	SD	NA	NA	21.1581	Dead	-2.46665
SAM187e056d6a2a	Male	0	Unknown	Current	Yes	PD	NA	NA	2.29979	Dead	-5.30634
SAMc0d625a50eb8	Female	1	Desert	Never	Yes	SD	3	0.294118	13.2731	Dead	-3.15212
SAM61baf919bb01	Female	1	Desert	Never	Yes	SD	NA	NA	15.6057	Dead	-3.51412
SAM7a9093b9c7e9	Male	1	Desert	Never	Yes	NE	1	0.215686	1.80698	Dead	-3.95281
SAMf2aae1443f67	Female	0	Desert	Never	Yes	PD	7	0.803922	10.3491	Dead	-4.12879
SAM9539a4f19ebc	Male	0	Desert	Never	Yes	SD	NA	0.431373	7.95072	Dead	-5.01829
SAMc0ef41aa6c8b	Male	0	Desert	Never	Yes	PD	5	0.960784	9.56057	Dead	-5.12794
SAM2c9586161ce6	Male	0	Desert	Never	Yes	PD	9	0.431373	11.269	Dead	-5.30634
SAMbcbc7957c264	Male	1	Desert	Never	Yes	PD	9	NA	4.17248	Dead	-5.66439
SAM54e58f1b0230	Male	1	Desert	Never	Yes	PD	5	NA	4.36961	Dead	-5.90434
SAM110501d0eedb	Male	1	Desert	Never	Yes	PD	21	3.52941	4.27105	Dead	-6.11705
SAMeff2ce356ccb	Male	0	Desert	Never	Yes	PD	14	NA	8.08214	Dead	-6.14794
SAMc57eadb2d82b	Male	1	Desert	Never	Yes	PD	3	0.196078	8.01643	Dead	-6.16996
SAMa1871f491b02	Female	1	Desert	Never	Yes	PD	NA	3.33333	1.74127	Dead	-6.17631
SAM18039827e1b9	Male	1	Desert	Never	Yes	PD	15	NA	1.47844	Dead	-6.2348
SAM491e341d5a82	Female	0	Desert	Never	Yes	NE	13	NA	1.87269	Dead	-6.44503
SAMd2492b2a31bb	Female	0	Desert	Never	Yes	PD	3	0.490196	7.85216	Dead	-6.68666
SAMd0e47be700b0	Male	1	Desert	Never	Yes	NE	5	NA	0.887064	Dead	-6.90671
SAM5a2347c0498a	Male	1	Desert	Never	Yes	SD	9	1.33333	4.89528	Dead	-6.91201
SAMc0da5d48686d	Male	1	Desert	Never	Yes	PD	5	1.17647	9.49487	Dead	-8.03306
SAM3e8baff50d7a	Male	0	Desert	Never	Yes	SD	11	1.21569	6.96509	Dead	-11.1824
SAM4b7ea015fd9e	Female	1	Excluded	Never	Yes	PD	NA	NA	13.2731	Dead	-2.50162
SAM75142fcab9df	Female	1	Excluded	Never	Yes	PD	7	0.27451	11.9261	Dead	-3.08184
SAM30cf07d4874f	Male	1	Excluded	Never	Yes	SD	NA	NA	11.6632	Dead	-3.21083
SAMaff272833538	Male	1	Excluded	Never	Yes	NE	5	1.27451	2.13552	Dead	-3.47394
SAM23aa15d4a0b0	Female	1	Excluded	Never	Yes	PD	5	0.333333	5.71663	Dead	-3.48524
SAM8e469834acc1	Male	1	Excluded	Never	Yes	PD	6	NA	3.71253	Dead	-4.29774
SAM4501e41e4751	Male	1	Excluded	Never	Yes	PD	6	0.921569	1.11704	Dead	-4.33902
SAM7f0d9cc7f001	Male	1	Excluded	Never	Yes	PD	NA	NA	4.63244	Dead	-4.4842
SAMb8f13a0525a6	Male	0	Excluded	Never	Yes	NE	4	0.529412	2.69405	Dead	-4.5831
SAMb15ad09d6e24	Female	0	Excluded	Never	Yes	PD	4	NA	3.8768	Dead	-4.82246
SAMe41b1e773582	Male	1	Excluded	Never	Yes	PD	6	0.470588	0.854209	Dead	-5.10049
SAMabc151b01ea3	Female	1	Excluded	Never	Yes	PD	NA	NA	0.558522	Dead	-5.12794
SAM297c0301e861	Male	1	Excluded	Never	Yes	PD	1	NA	8.08214	Dead	-5.14966
SAMa913c6139ec8	Male	0	Excluded	Never	Yes	SD	NA	1.52941	5.12526	Dead	-5.17807
SAM0ce9c983b20f	Male	0	Excluded	Never	Yes	PD	9	NA	6.6037	Dead	-5.36319
SAM2070b416069c	Male	1	Excluded	Never	Yes	SD	5	0.294118	8.01643	Dead	-5.65993
SAMbe83eae4026e	Female	1	Excluded	Never	Yes	PD	10	0.784314	2.7269	Dead	-5.67785
SAM2f228939632f	Female	1	Excluded	Never	Yes	PD	8	0.45098	7.88501	Dead	-6.12933
SAM557dde1b9f3e	Male	1	Excluded	Never	Yes	PD	5	NA	6.70226	Dead	-6.15106
SAMbd8ee73983b8	Male	1	Excluded	Never	Yes	NE	9	1.01961	0.854209	Dead	-6.70033
SAM0a7c2091dd56	Male	1	Excluded	Never	Yes	PD	8	1.27451	2.62834	Dead	-6.94418
SAM698d8d76b934	Female	1	Excluded	Never	Yes	NE	6	1.01961	0.427105	Dead	-7.18558
SAM9eebdef2858a	Female	1	Excluded	Never	Yes	NE	NA	NA	0.821355	Dead	-7.95451
SAM3f446449bf81	Male	1	Inflamed	Never	Yes	NE	NA	0.980392	0.755647	Dead	-4.12648
SAMab8052a03398	Male	1	Inflamed	Never	Yes	SD	NA	0.0392157	13.306	Dead	-4.76267
SAMb0d11db9aa79	Female	0	Inflamed	Never	Yes	PD	3	0.843137	10.5462	Dead	-4.97334
SAM95c70496ffb5	Female	0	Inflamed	Never	Yes	NE	NA	NA	0.361396	Dead	-5.12794
SAMe3210d3632b4	Female	1	Inflamed	Never	Yes	PD	17	0.862745	2.16838	Dead	-5.4433
SAMf20b827dca51	Male	0	Inflamed	Never	Yes	PD	14	1.09804	4.36961	Dead	-5.50395
SAM714285adf612	Male	1	Inflamed	Never	Yes	NE	5	0.980392	0.62423	Dead	-5.68916
SAMba1a34b5a060	Male	0	Inflamed	Never	Yes	PD	5	0.901961	12.846	Dead	-6.10185
SAM6cbc10abddb0	Male	1	Inflamed	Never	Yes	PD	3	0.960784	5.94661	Dead	-7.90092
SAM73b653ae20d1	Female	1	Inflamed	Never	Yes	NE	3	0.960784	1.80698	Dead	-7.98765
SAMdee1011782cd	Male	1	Unknown	Never	Yes	PD	NA	NA	3.90965	Dead	-2.99891
SAM8a42c0d59187	Male	1	Unknown	Never	Yes	NE	3	0.27451	2.82546	Dead	-3.11427
SAM5b57e47fdcb3	Female	1	Unknown	Never	Yes	PD	12	NA	3.84394	Dead	-3.45354
SAMf2ce197162ce	Male	0	Unknown	Never	Yes	NE	3	0.568627	1.577	Dead	-3.66009
SAM7c67b05aa109	Female	0	Unknown	Never	Yes	SD	5	0.529412	8.24641	Dead	-3.90652
SAM0bdb3428bd13	Female	1	Unknown	Never	Yes	PD	NA	NA	2.23409	Dead	-3.9908
SAM0a0f2bac4b20	Male	0	Unknown	Never	Yes	PD	2	0.215686	1.18275	Dead	-4.83748
SAM7114d99032ec	Male	1	Unknown	Never	Yes	PD	17	2.17647	10.8419	Dead	-4.88873
SAMb2e4a082541a	Female	1	Unknown	Never	Yes	PD	NA	NA	4.36961	Dead	-5.04275
SAM9d2494119c05	Male	1	Unknown	Never	Yes	PD	NA	NA	1.44559	Dead	-5.255
SAM9410b866974a	Male	1	Unknown	Never	Yes	SD	NA	NA	6.73511	Dead	-5.61392
SAM59b825252c0d	Male	1	Unknown	Never	Yes	NE	15	NA	0.525667	Dead	-5.69143
SAMae4da274eded	Female	1	Unknown	Never	Yes	PD	NA	NA	4.99384	Dead	-5.71668
SAM59fda9035d1d	Male	1	Unknown	Never	Yes	PD	NA	NA	3.74538	Dead	-7.08651
SAM63405b04ab2d	Male	0	Unknown	Never	Yes	PD	NA	0.156863	6.80082	Dead	-7.14763
SAM5d1dfd5207f5	Male	1	Unknown	Never	Yes	PD	12	NA	10.9076	Dead	-7.68621
SAM7746b76437e6	Male	1	Desert	Previous	Yes	NE	5	0.392157	2.82546	Dead	-0.274841
SAMf28c01545593	Male	0	Desert	Previous	Yes	SD	8	NA	6.40657	Dead	-2.182
SAM025b45c27e05	Male	0	Desert	Previous	Yes	PD	1	0.313725	8.77207	Dead	-3.18818
SAMffa5c7cad0e5	Male	1	Desert	Previous	Yes	PR	10	NA	15.54	Dead	-3.41171
SAMc692536a795a	Male	1	Desert	Previous	Yes	PD	10	NA	5.65092	Dead	-3.81444
SAMfd947610629d	Male	0	Desert	Previous	Yes	PD	5	NA	9.03491	Dead	-3.88424
SAM4b0175e8db6e	Male	1	Desert	Previous	Yes	PD	6	NA	2.06982	Dead	-4.05302
SAM675a12a09c15	Male	0	Desert	Previous	Yes	PD	13	1.2549	2.89117	Dead	-4.60758
SAMd98bac0a070f	Male	1	Desert	Previous	Yes	PD	8	0.72549	2.06982	Dead	-4.88613
SAM5234688806a7	Male	1	Desert	Previous	Yes	PD	13	0.313725	5.8809	Dead	-4.89789
SAM943df5cf15df	Male	1	Desert	Previous	Yes	PD	5	0.117647	2.13552	Dead	-4.92439
SAM23095936e611	Female	0	Desert	Previous	Yes	PD	5	0.235294	2.23409	Dead	-5.20867
SAM29da928587ad	Female	1	Desert	Previous	Yes	PD	NA	0.490196	2.59548	Dead	-5.48805
SAM4305ab968b90	Male	1	Desert	Previous	Yes	PD	12	0.392157	1.41273	Dead	-5.70056
SAMb2f1d0e54ece	Male	1	Desert	Previous	Yes	PR	NA	0.862745	11.4004	Dead	-5.74474
SAM5d989c86255e	Female	1	Desert	Previous	Yes	PD	13	1.41176	3.44969	Dead	-6.37028
SAM468a9e1dc821	Male	1	Desert	Previous	Yes	PD	8	NA	3.8768	Dead	-6.52386
SAMb8070b7937e7	Male	0	Desert	Previous	Yes	SD	5	0.333333	21.0267	Dead	-6.56079
SAM8533e5e261d6	Male	0	Desert	Previous	Yes	PR	5	1.72549	12.8131	Dead	-7.71367
SAMd86389d0d768	Male	1	Desert	Previous	Yes	PD	NA	1.41176	2.20123	Dead	-8.71275
SAM99a46b9eec27	Male	1	Excluded	Previous	Yes	PD	5	0.72549	3.61396	Dead	-2.7893
SAMaf7578d55754	Female	1	Excluded	Previous	Yes	NE	NA	2.66667	0.229979	Dead	-3.1918
SAM36851bc8b9ae	Male	1	Excluded	Previous	Yes	SD	7	0.333333	3.54825	Dead	-3.2434
SAM59f392864f5d	Male	0	Excluded	Previous	Yes	SD	14	NA	17.7741	Dead	-3.60227
SAMcf018fee2acd	Male	0	Excluded	Previous	Yes	PD	NA	NA	16.23	Dead	-3.71801
SAM49d48750e294	Male	0	Excluded	Previous	Yes	PD	0	0.607843	9.85626	Dead	-3.80765
SAMbf91f27e7f9b	Male	0	Excluded	Previous	Yes	NE	3	NA	0.591376	Dead	-3.90586
SAM00b9e5c52da9	Male	1	Excluded	Previous	Yes	NE	NA	NA	1.90554	Dead	-4.05375
SAM166a419a4e5a	Male	1	Excluded	Previous	Yes	PD	5	0.27451	5.38809	Dead	-4.06035
SAM1c0ecfb3eb63	Female	0	Excluded	Previous	Yes	PD	NA	NA	5.84805	Dead	-4.08554
SAMdcae54fcd7fa	Male	1	Excluded	Previous	Yes	SD	NA	1.43137	6.2423	Dead	-4.46171
SAMd135d5867fe3	Male	1	Excluded	Previous	Yes	PD	3	0.607843	3.61396	Dead	-4.55695
SAMe5bc41772bc9	Male	1	Excluded	Previous	Yes	PD	5	0.27451	6.11088	Dead	-4.5905
SAM2624229effe8	Male	1	Excluded	Previous	Yes	PD	6	0.431373	2.56263	Dead	-4.65448
SAM9aa6a095a9d6	Male	0	Excluded	Previous	Yes	PD	5	0.647059	8.83778	Dead	-4.7484
SAM1c8b086175ca	Male	0	Excluded	Previous	Yes	PD	7	0.54902	20.7639	Dead	-4.77588
SAMfddc359e862b	Female	1	Excluded	Previous	Yes	NE	NA	NA	1.9384	Dead	-4.98863
SAM2bba8cb35e48	Male	1	Excluded	Previous	Yes	PD	11	1.29412	10.4805	Dead	-5.08547
SAMff41c4e8c08f	Male	0	Excluded	Previous	Yes	NE	14	NA	2.46407	Dead	-5.18927
SAM99b1f6a9534e	Female	0	Excluded	Previous	Yes	NE	5	1	0.492813	Dead	-5.41861
SAM7ee2b6e4d6b3	Male	1	Excluded	Previous	Yes	NE	36	6.80392	1.70842	Dead	-5.518
SAM5e3bae090b8c	Male	1	Excluded	Previous	Yes	PD	6	0.823529	6.73511	Dead	-5.64003
SAM0571f17f4045	Female	0	Excluded	Previous	Yes	SD	2	1.47059	4.53388	Dead	-5.70515
SAM49f9b2e57aa5	Male	1	Excluded	Previous	Yes	PD	5	1.45098	7.45791	Dead	-5.8124
SAM415f36ad349e	Male	0	Excluded	Previous	Yes	PD	NA	0.431373	17.9713	Dead	-5.91227
SAMd697ba701077	Female	0	Excluded	Previous	Yes	SD	NA	NA	21.1581	Dead	-5.92025
SAM2dc578e0165f	Male	1	Excluded	Previous	Yes	NE	8	NA	1.97125	Dead	-5.99409
SAM0257bbbbd388	Male	1	Excluded	Previous	Yes	SD	18	4.68627	15.6386	Dead	-6.01387
SAMe97af0feefdf	Female	0	Excluded	Previous	Yes	PD	3	0.705882	11.1047	Dead	-6.09582
SAMcee0fa8c05b4	Male	1	Excluded	Previous	Yes	NE	7	1.37255	1.67556	Dead	-6.13241
SAM957378bd907f	Male	0	Excluded	Previous	Yes	PD	NA	0.196078	2.23409	Dead	-6.20526
SAM19fec8f3b3bd	Male	1	Excluded	Previous	Yes	PD	5	0.431373	9.88912	Dead	-6.24144
SAMe94c30c30616	Male	1	Excluded	Previous	Yes	SD	6	1.01961	15.3758	Dead	-6.24478
SAMeb29625f76a5	Male	1	Excluded	Previous	Yes	PD	2	0.0588235	3.12115	Dead	-6.40717
SAM18be5b395318	Male	1	Excluded	Previous	Yes	PD	5	0.470588	9.00205	Dead	-6.69576
SAM8e43e9caf307	Female	0	Excluded	Previous	Yes	NE	4	1	0.492813	Dead	-6.7516
SAM5c139c5c1c4f	Male	1	Excluded	Previous	Yes	PD	NA	NA	7.22793	Dead	-6.90144
SAM39eb94fa504d	Male	1	Excluded	Previous	Yes	PD	6	NA	17.9055	Dead	-6.99381
SAMbcb07ba81cee	Male	0	Excluded	Previous	Yes	PD	NA	NA	2.52977	Dead	-7.84924
SAM30b5c6c54cf7	Female	1	Excluded	Previous	Yes	CR	6	NA	9.26489	Dead	-8.3121
SAM18a4dabbc557	Male	1	Excluded	Previous	Yes	PD	18	2.03922	16.46	Dead	-12.9644
SAM9681450bbc90	Male	1	Inflamed	Previous	Yes	NE	21	NA	4.96099	Dead	-3.25933
SAMa1e62d323e1d	Female	0	Inflamed	Previous	Yes	SD	15	0.921569	10.5791	Dead	-4.0421
SAMd636e3461955	Male	1	Inflamed	Previous	Yes	PD	NA	0.196078	10.4805	Dead	-4.17655
SAM9a2cf3c06fb3	Male	0	Inflamed	Previous	Yes	PD	4	0.862745	5.65092	Dead	-4.27029
SAM9448d858692c	Male	1	Inflamed	Previous	Yes	NE	8	NA	2.03696	Dead	-4.39258
SAM9e11ec6bea80	Male	1	Inflamed	Previous	Yes	SD	10	NA	15.4086	Dead	-4.7795
SAMb4c7a001537d	Male	1	Inflamed	Previous	Yes	PD	5	NA	3.18686	Dead	-4.86416
SAM3f2033c90438	Male	1	Inflamed	Previous	Yes	NE	NA	NA	0.821355	Dead	-5.43185
SAM1e9c4d1d39ae	Female	0	Inflamed	Previous	Yes	PD	5	1.43137	12.4189	Dead	-5.82982
SAM12502d970c10	Male	0	Inflamed	Previous	Yes	SD	10	1.07843	7.3922	Dead	-5.95807
SAM2dc3f04e45e9	Male	1	Inflamed	Previous	Yes	PD	NA	NA	10.1848	Dead	-5.9663
SAM91c47b054ffb	Male	0	Inflamed	Previous	Yes	PR	49	2.70588	17.0185	Dead	-6.30965
SAM9cafb905b36a	Male	0	Inflamed	Previous	Yes	PD	12	0.588235	7.62218	Dead	-6.38125
SAM9b9d48b0b02c	Male	1	Inflamed	Previous	Yes	NE	5	2.11765	2.89117	Dead	-6.41842
SAM6780ed436b55	Female	1	Inflamed	Previous	Yes	PD	14	2.54902	6.2423	Dead	-6.98263
SAM032c642382a7	Female	1	Inflamed	Previous	Yes	PD	44	6.19608	2.49692	Dead	-7.20493
SAM45c8e6412c66	Male	1	Inflamed	Previous	Yes	PD	5	1.39216	3.48255	Dead	-7.36991
SAMdf3e42c8672a	Male	1	Inflamed	Previous	Yes	PD	19	3.23529	7.32649	Dead	-8.41354
SAM4edbe45817b3	Male	1	Inflamed	Previous	Yes	NE	26	3.68627	1.05133	Dead	-8.82807
SAM09c84ec0cf34	Male	1	Inflamed	Previous	Yes	PD	NA	NA	6.50513	Dead	-8.88939
SAMe7bcab05402e	Male	1	Unknown	Previous	Yes	SD	NA	NA	7.91786	Dead	-1.94894
SAMee3844cc0b9f	Male	1	Unknown	Previous	Yes	PD	NA	NA	3.21971	Dead	-3.09759
SAMcc4675f394a1	Male	1	Unknown	Previous	Yes	PD	NA	NA	3.12115	Dead	-3.61894
SAM5ffd7e4cd794	Male	1	Unknown	Previous	Yes	NE	NA	NA	1.21561	Dead	-3.69104
SAM31f41dd0d6ca	Female	1	Unknown	Previous	Yes	SD	NA	0.705882	8.27926	Dead	-3.81197
SAM553c3c35b847	Female	0	Unknown	Previous	Yes	PD	NA	NA	6.70226	Dead	-4.12648
SAM568ce160abd9	Female	0	Unknown	Previous	Yes	SD	NA	NA	12.846	Dead	-4.29169
SAM7bff231634e9	Male	1	Unknown	Previous	Yes	SD	NA	0.72549	10.2505	Dead	-4.80389
SAMd1bd63734394	Male	1	Unknown	Previous	Yes	PD	22	NA	1.9384	Dead	-5.08696
SAMa90d73f8d891	Male	0	Unknown	Previous	Yes	PD	12	0.72549	1.01848	Dead	-5.42427
SAM7893196e0e89	Male	1	Unknown	Previous	Yes	PD	5	0.941176	2.66119	Dead	-5.9526
SAM3785587846ce	Female	1	Unknown	Previous	Yes	NE	9	NA	7.06366	Dead	-6.10488
SAM563d6233dfa2	Male	1	Unknown	Previous	Yes	PD	NA	0.607843	2.13552	Dead	-6.49578
SAM52e3fa3ad574	Male	1	Unknown	Previous	Yes	PD	4	0.254902	7.95072	Dead	-6.50375
SAMa424c75831b4	Male	1	Unknown	Previous	Yes	PD	6	0.686275	3.54825	Dead	-6.99944
SAM6dd7ad1d797d	Male	1	Unknown	Previous	Yes	PD	NA	3.56863	19.2854	Dead	-8.21733
SAMae02629a97f7	Female	0	Unknown	Previous	Yes	PD	NA	NA	3.25257	Dead	-9.11491
SAM2de7cffb5f72	Male	1	Unknown	Previous	Yes	NE	NA	NA	1.83984	Dead	-9.41204

## Sheet: Supplementary Table 5
Supplementary Table 5. Clinical features and immunotherapy information of advanced melanoma cohort.
Sample ID	Sex	Stage	OS (months)	OS status	PFS (months)	PFS status	Response	Therapy target	Therapy drug
Patient1	Female	M1c	9.43333	1	3.1	1	PD	CTLA-4 plus PD-1/PD-L1	Ipilimumab+Pembrolizumab
Patient10	Female	M1c	37.9667	1	5.63333	1	CR/PR	CTLA-4 plus PD-1/PD-L1	Ipilimumab+Pembrolizumab
Patient100	Female	M1c	31.2667	1	30.7333	0	CR/PR	CTLA-4 plus PD-1/PD-L1	Ipilimumab+Nivolumab
Patient104	Female	M1c	26.3	0	26.3	0	CR/PR	PD-1/PD-L1	Pembrolizumab
Patient105	Female	M1c	17.3667	1	12.6	0	MR	PD-1/PD-L1	Pembrolizumab
Patient106	Female	M1c	26	0	26	0	CR/PR	PD-1/PD-L1	Pembrolizumab
Patient11	Female	M1c	5.33333	1	2.83333	1	PD	CTLA-4 plus PD-1/PD-L1	Ipilimumab+Pembrolizumab
Patient110	Female	M1c	16.8667	0	3.13333	1	PD	PD-1/PD-L1	Pembrolizumab
Patient112	Female	M1c	17.3667	1	3.03333	1	PD	PD-1/PD-L1	Nivolumab
Patient116	Female	M1c	3.93333	1	2.13333	1	PD	PD-1/PD-L1	Nivolumab
Patient117	Female	M1c	9.83333	1	3.33333	1	PD	CTLA-4 plus PD-1/PD-L1	Ipilimumab+Pembrolizumab
Patient118	Female	M1c	43.8667	0	43.8667	0	CR/PR	CTLA-4 plus PD-1/PD-L1	Ipilimumab+Pembrolizumab
Patient119	Female	M1c	8.66667	1	2.46667	1	PD	CTLA-4 plus PD-1/PD-L1	Ipilimumab+Pembrolizumab
Patient120	Female	M1c	43.7	0	43.7	0	CR/PR	CTLA-4 plus PD-1/PD-L1	Ipilimumab+Pembrolizumab
Patient121	Female	M1c	43.5333	0	40.9333	1	CR/PR	CTLA-4 plus PD-1/PD-L1	Ipilimumab+Pembrolizumab
Patient130	Female	M1c	6.4	1	4.13333	1	PD	PD-1/PD-L1	Nivolumab
Patient137	Female	M1c	25.7333	0	25.7333	0	CR/PR	PD-1/PD-L1	Pembrolizumab
Patient14	Female	M1b	6.2	1	2.53333	1	PD	PD-1/PD-L1	Pembrolizumab
Patient141	Female	M1c	29.1667	0	29.1667	0	CR/PR	PD-1/PD-L1	Nivolumab
Patient142	Female	M1a	33.2	0	33.2	0	SD	PD-1/PD-L1	Pembrolizumab
Patient146	Female	M1c	20.4	0	20.4	0	CR/PR	PD-1/PD-L1	Pembrolizumab
Patient148	Female	M1a	26.4	0	26.4	0	CR/PR	PD-1/PD-L1	Pembrolizumab
Patient15	Female	M1c	4.96667	1	3.5	1	CR/PR	CTLA-4 plus PD-1/PD-L1	Ipilimumab+Pembrolizumab
Patient154	Female	M0	21.1667	0	8.36667	1	SD	PD-1/PD-L1	Pembrolizumab
Patient159	Female	M1c	9.6	0	7.2	1	SD	CTLA-4 plus PD-1/PD-L1	Ipilimumab+Pembrolizumab
Patient166	Female	M1c	6.83333	1	6.83333	0	CR/PR	PD-1/PD-L1	Nivolumab
Patient167	Female	M1c	9.4	1	1.9	1	PD	PD-1/PD-L1	Nivolumab
Patient173	Female	M1c	1.4	1	0.533333	1	PD	PD-1/PD-L1	Pembrolizumab
Patient179	Female	M1b	21.7667	0	11.2	1	CR/PR	PD-1/PD-L1	Pembrolizumab
Patient181	Female	M1c	15.8667	0	15.8667	0	CR/PR	PD-1/PD-L1	Nivolumab
Patient182	Female	M1c	24.9333	1	2.8	1	PD	PD-1/PD-L1	Nivolumab
Patient187	Female	M1a	20.5667	0	20.5667	0	CR/PR	CTLA-4 plus PD-1/PD-L1	Ipilimumab+Pembrolizumab
Patient189	Female	M1c	23.9333	0	13.5333	1	CR/PR	PD-1/PD-L1	Pembrolizumab
Patient192	Female	M1c	9.66667	0	8.3	1	CR/PR	CTLA-4 plus PD-1/PD-L1	Ipilimumab+Pembrolizumab
Patient193	Female	M0	21.9667	0	15.8667	1	SD	PD-1/PD-L1	Pembrolizumab
Patient197	Female	M1c	32	0	2.96667	1	CR/PR	PD-1/PD-L1	Nivolumab
Patient20	Female	M1c	8.06667	1	2.8	1	PD	CTLA-4 plus PD-1/PD-L1	Ipilimumab+Nivolumab
Patient205	Female	M1c	13.0667	1	6.33333	1	PD	PD-1/PD-L1	Pembrolizumab
Patient21	Female	M1c	30.2	0	30.2	0	CR/PR	CTLA-4 plus PD-1/PD-L1	Ipilimumab+Pembrolizumab
Patient30	Female	M1c	7.1	1	4.43333	1	SD	CTLA-4 plus PD-1/PD-L1	Ipilimumab+Pembrolizumab
Patient32	Female	M1c	1.76667	1	1.63333	1	PD	CTLA-4 plus PD-1/PD-L1	Ipilimumab+Pembrolizumab
Patient33	Female	M1c	55.9667	0	55.9667	0	CR/PR	CTLA-4 plus PD-1/PD-L1	Ipilimumab+Pembrolizumab
Patient40	Female	M1c	15.6	1	2.1	1	PD	PD-1/PD-L1	Nivolumab
Patient47	Female	M1c	31.2333	0	2.46667	1	PD	PD-1/PD-L1	Nivolumab
Patient48	Female	M1c	1.76667	1	1.66667	1	PD	PD-1/PD-L1	Pembrolizumab
Patient49	Female	M1c	54.5	0	9.33333	1	CR/PR	CTLA-4 plus PD-1/PD-L1	Ipilimumab+Nivolumab
Patient50	Female	M1c	5.83333	1	3.5	1	MR	CTLA-4 plus PD-1/PD-L1	Ipilimumab+Pembrolizumab
Patient6	Female	M1b	22.9	1	4.13333	1	SD	CTLA-4 plus PD-1/PD-L1	Ipilimumab+Pembrolizumab
Patient61	Female	M1c	32.9	0	32.9	0	SD	CTLA-4 plus PD-1/PD-L1	Ipilimumab+Nivolumab
Patient62	Female	M1c	33.3667	0	33.3667	0	CR/PR	CTLA-4 plus PD-1/PD-L1	Ipilimumab+Nivolumab
Patient63	Female	M1c	5.93333	1	2.96667	1	PD	CTLA-4 plus PD-1/PD-L1	Ipilimumab+Nivolumab
Patient67	Female	M1c	4.53333	1	3.13333	1	PD	PD-1/PD-L1	Nivolumab
Patient77	Female	M1c	14.8	1	3.16667	1	PD	PD-1/PD-L1	Pembrolizumab
Patient78	Female	M1b	11.8667	1	2.86667	1	PD	PD-1/PD-L1	Pembrolizumab
Patient79	Female	M1c	28.3	0	2.8	1	PD	PD-1/PD-L1	Pembrolizumab
Patient84	Female	M1c	5.46667	1	2.76667	1	PD	CTLA-4 plus PD-1/PD-L1	Ipilimumab+Pembrolizumab
Patient87	Female	M1c	42.1	0	38.0667	1	CR/PR	CTLA-4 plus PD-1/PD-L1	Ipilimumab+Pembrolizumab
Patient9	Female	M0	32.1	0	0.7	1	PD	PD-1/PD-L1	Nivolumab
Patient94	Female	M1c	1.33333	1	1.33333	1	PD	CTLA-4 plus PD-1/PD-L1	Ipilimumab+Pembrolizumab
Patient98	Female	M1b	22.7667	1	2.43333	1	PD	PD-1/PD-L1	Nivolumab
Patient102	Male	M1c	26.1667	0	5.86667	1	MR	PD-1/PD-L1	Pembrolizumab
Patient107	Male	M1c	1.56667	1	1.56667	1	CR/PR	PD-1/PD-L1	Pembrolizumab
Patient108	Male	M1c	5.5	1	2.56667	1	PD	PD-1/PD-L1	Pembrolizumab
Patient125	Male	M1c	32.6	0	32.6	0	CR/PR	PD-1/PD-L1	Nivolumab
Patient126	Male	M1c	33.0667	0	24.7333	1	CR/PR	PD-1/PD-L1	Nivolumab
Patient127	Male	M1c	28.8667	0	28.8667	0	CR/PR	PD-1/PD-L1	Nivolumab
Patient13	Male	M1c	1.93333	1	1.46667	1	PD	CTLA-4 plus PD-1/PD-L1	Ipilimumab+Pembrolizumab
Patient131	Male	M1b	27.7667	0	27.7667	0	CR/PR	PD-1/PD-L1	Pembrolizumab
Patient132	Male	M1b	24.6333	0	12.9667	1	CR/PR	PD-1/PD-L1	Pembrolizumab
Patient133	Male	M1c	12.3333	1	2.1	1	PD	PD-1/PD-L1	Pembrolizumab
Patient134	Male	M1b	19.6667	1	2.1	1	PD	PD-1/PD-L1	Pembrolizumab
Patient135	Male	M1c	20.9333	0	20.9333	0	CR/PR	PD-1/PD-L1	Pembrolizumab
Patient136	Male	M1b	23.2667	0	2.06667	1	PD	PD-1/PD-L1	Pembrolizumab
Patient140	Male	M1b	11.7	1	2.23333	1	PD	PD-1/PD-L1	Pembrolizumab
Patient143	Male	M0	21	0	5.1	1	PD	PD-1/PD-L1	Pembrolizumab
Patient144	Male	M1c	22.0667	0	22.0667	0	CR/PR	PD-1/PD-L1	Pembrolizumab
Patient145	Male	M1c	27.7667	0	27.7667	0	CR/PR	PD-1/PD-L1	Pembrolizumab
Patient147	Male	M1c	32	0	32	0	CR/PR	PD-1/PD-L1	Nivolumab
Patient149	Male	M1c	16.5667	1	7	1	SD	PD-1/PD-L1	Pembrolizumab
Patient150	Male	M1c	22.8333	0	22.8333	0	CR/PR	PD-1/PD-L1	Pembrolizumab
Patient155	Male	M0	15.8333	0	3.76667	1	PD	PD-1/PD-L1	Pembrolizumab
Patient156	Male	M1c	2.9	1	2.66667	1	PD	PD-1/PD-L1	Pembrolizumab
Patient157	Male	M1c	4.76667	0	2.76667	1	PD	PD-1/PD-L1	Pembrolizumab
Patient158	Male	M1c	6.46667	0	5.4	1	CR/PR	PD-1/PD-L1	Pembrolizumab
Patient162	Male	M1c	6.7	1	1.76667	1	PD	CTLA-4 plus PD-1/PD-L1	Ipilimumab+Nivolumab
Patient163	Male	M1c	5.76667	1	1.6	1	PD	CTLA-4 plus PD-1/PD-L1	Ipilimumab+Nivolumab
Patient165	Male	M1c	2.5	0	0.433333	1	PD	PD-1/PD-L1	Pembrolizumab
Patient168	Male	M1c	20.7667	0	19.3333	0	CR/PR	PD-1/PD-L1	Nivolumab
Patient169	Male	M1c	18.1	0	18.1	0	CR/PR	PD-1/PD-L1	Pembrolizumab
Patient17	Male	M1c	22.8667	1	6.73333	1	SD	CTLA-4 plus PD-1/PD-L1	Ipilimumab+Nivolumab
Patient170	Male	M0	11.5667	0	11.5667	0	SD	PD-1/PD-L1	Pembrolizumab
Patient172	Male	M0	9.06667	0	9.06667	1	SD	PD-1/PD-L1	Pembrolizumab
Patient18	Male	M0	4.33333	1	2.86667	1	PD	PD-1/PD-L1	Nivolumab
Patient180	Male	M1c	12.6667	1	11.4333	1	SD	PD-1/PD-L1	Pembrolizumab
Patient183	Male	M1c	19.0667	1	2.8	1	PD	PD-1/PD-L1	Pembrolizumab
Patient184	Male	M1c	17.1	0	12.4	0	CR/PR	PD-1/PD-L1	Nivolumab
Patient185	Male	M1c	6.76667	0	6.76667	0	SD	PD-1/PD-L1	Nivolumab
Patient188	Male	M1a	2.46667	1	0.766667	1	PD	PD-1/PD-L1	Pembrolizumab
Patient191	Male	M1b	21.9333	0	21.9333	0	CR/PR	PD-1/PD-L1	Nivolumab
Patient195	Male	M1c	29.8333	0	29.8333	0	CR/PR	CTLA-4 plus PD-1/PD-L1	Ipilimumab+Nivolumab
Patient196	Male	M1c	2.7	1	2.7	1	PD	PD-1/PD-L1	Nivolumab
Patient200	Male	M1c	17.0667	1	3.6	1	PD	PD-1/PD-L1	Pembrolizumab
Patient201	Male	M0	5.56667	1	2.3	1	PD	PD-1/PD-L1	Pembrolizumab
Patient203	Male	M1b	20.8667	1	3.3	1	PD	CTLA-4 plus PD-1/PD-L1	Ipilimumab+Pembrolizumab
Patient204	Male	M1a	27.3	0	21	0	CR/PR	PD-1/PD-L1	Pembrolizumab
Patient206	Male	M1c	3	1	1.4	1	PD	CTLA-4 plus PD-1/PD-L1	Ipilimumab+Pembrolizumab
Patient22	Male	M1c	8.43333	1	3.03333	1	PD	CTLA-4 plus PD-1/PD-L1	Ipilimumab+Nivolumab
Patient23	Male	M0	32.5	0	2.56667	1	PD	PD-1/PD-L1	Nivolumab
Patient24	Male	M1c	4.56667	1	1.03333	1	PD	CTLA-4 plus PD-1/PD-L1	Ipilimumab+Nivolumab
Patient25	Male	M1c	36.5333	0	25.0667	1	CR/PR	CTLA-4 plus PD-1/PD-L1	Ipilimumab+Pembrolizumab
Patient27	Male	M1a	14.3667	1	3.13333	1	PD	CTLA-4 plus PD-1/PD-L1	Ipilimumab+Pembrolizumab
Patient31	Male	M1c	14.2	1	2.83333	1	PD	CTLA-4 plus PD-1/PD-L1	Ipilimumab+Pembrolizumab
Patient34	Male	M1b	56.3667	0	8	1	CR/PR	CTLA-4 plus PD-1/PD-L1	Ipilimumab+Pembrolizumab
Patient35	Male	M1c	32.2667	1	6.03333	1	SD	CTLA-4 plus PD-1/PD-L1	Ipilimumab+Nivolumab
Patient36	Male	M1c	15.0333	1	2.1	1	PD	PD-1/PD-L1	Nivolumab
Patient37	Male	M1c	9.16667	1	2.56667	1	PD	PD-1/PD-L1	Nivolumab
Patient38	Male	M1c	11.4333	1	3.26667	1	PD	CTLA-4 plus PD-1/PD-L1	Ipilimumab+Nivolumab
Patient39	Male	M1a	31.2333	0	31.2333	0	SD	PD-1/PD-L1	Nivolumab
Patient4	Male	M1c	20	1	19.1333	1	CR/PR	CTLA-4 plus PD-1/PD-L1	Ipilimumab+Pembrolizumab
Patient41	Male	M1b	56.1667	0	3.53333	1	CR/PR	CTLA-4 plus PD-1/PD-L1	Ipilimumab+Nivolumab
Patient42	Male	M1c	34.2333	0	34.2333	0	CR/PR	CTLA-4 plus PD-1/PD-L1	Ipilimumab+Nivolumab
Patient43	Male	M1c	30.8333	0	25	1	CR/PR	PD-1/PD-L1	Nivolumab
Patient44	Male	M1c	30.7333	0	30.7333	0	CR/PR	CTLA-4 plus PD-1/PD-L1	Ipilimumab+Nivolumab
Patient45	Male	M1c	55.5333	0	55.5333	0	CR/PR	CTLA-4 plus PD-1/PD-L1	Ipilimumab+Nivolumab
Patient46	Male	M1c	29.8667	0	29.8667	0	SD	PD-1/PD-L1	Pembrolizumab
Patient51	Male	M1b	51.5667	0	15.7	1	CR/PR	PD-1/PD-L1	Nivolumab
Patient54	Male	M1c	33.9	1	14.3	1	MR	CTLA-4 plus PD-1/PD-L1	Ipilimumab+Pembrolizumab
Patient55	Male	M1c	50.1	0	50.1	0	CR/PR	PD-1/PD-L1	Nivolumab
Patient56	Male	M1c	4.06667	1	2.36667	1	PD	CTLA-4 plus PD-1/PD-L1	Ipilimumab+Nivolumab
Patient58	Male	M1c	10.1	1	2.56667	1	PD	CTLA-4 plus PD-1/PD-L1	Ipilimumab+Nivolumab
Patient59	Male	M1c	6.36667	1	2.73333	1	PD	CTLA-4 plus PD-1/PD-L1	Ipilimumab+Nivolumab
Patient60	Male	M1b	22.0667	1	5.83333	1	SD	CTLA-4 plus PD-1/PD-L1	Ipilimumab+Nivolumab
Patient7	Male	M1c	8.96667	1	7.23333	1	SD	CTLA-4 plus PD-1/PD-L1	Ipilimumab+Pembrolizumab
Patient72	Male	M1a	13.1667	0	2.23333	1	PD	CTLA-4 plus PD-1/PD-L1	Ipilimumab+Nivolumab
Patient73	Male	M1c	28.2	1	2.83333	1	PD	CTLA-4 plus PD-1/PD-L1	Ipilimumab+Nivolumab
Patient75	Male	M1c	29.7	0	29.7	1	CR/PR	PD-1/PD-L1	Nivolumab
Patient8	Male	M1b	33.5	1	31.8333	1	SD	PD-1/PD-L1	Pembrolizumab
Patient80	Male	M1b	16.7333	1	2.56667	1	PD	CTLA-4 plus PD-1/PD-L1	Ipilimumab+Pembrolizumab
Patient82	Male	M1c	4.36667	1	2.96667	1	PD	CTLA-4 plus PD-1/PD-L1	Ipilimumab+Pembrolizumab
Patient83	Male	M1c	2.36667	1	2.36667	1	PD	CTLA-4 plus PD-1/PD-L1	Ipilimumab+Nivolumab
Patient86	Male	M1c	44.2333	0	44.2333	1	SD	CTLA-4 plus PD-1/PD-L1	Ipilimumab+Pembrolizumab
Patient88	Male	M1c	2.46667	1	2.3	1	PD	CTLA-4 plus PD-1/PD-L1	Ipilimumab+Pembrolizumab
Patient96	Male	M1c	30.4333	0	30.4333	0	CR/PR	PD-1/PD-L1	Nivolumab
Patient99	Male	M1c	30.7	0	10.6333	1	CR/PR	PD-1/PD-L1	Nivolumab

## Sheet: Supplementary Table 6
Supplementary Table 6. The list of curated immune-related genes.
Symbol	ID	Category
AZGP1	563	Antigen_Processing_and_Presentation
B2M	567	Antigen_Processing_and_Presentation
CALR	811	Antigen_Processing_and_Presentation
CANX	821	Antigen_Processing_and_Presentation
CD1A	909	Antigen_Processing_and_Presentation
CD1B	910	Antigen_Processing_and_Presentation
CD1C	911	Antigen_Processing_and_Presentation
CD1D	912	Antigen_Processing_and_Presentation
CD1E	913	Antigen_Processing_and_Presentation
CD4	920	Antigen_Processing_and_Presentation
CD8A	925	Antigen_Processing_and_Presentation
CD8B	926	Antigen_Processing_and_Presentation
CD74	972	Antigen_Processing_and_Presentation
CREB1	1385	Antigen_Processing_and_Presentation
CTSB	1508	Antigen_Processing_and_Presentation
CTSE	1510	Antigen_Processing_and_Presentation
CTSL	1514	Antigen_Processing_and_Presentation
CTSS	1520	Antigen_Processing_and_Presentation
FCER1G	2207	Antigen_Processing_and_Presentation
FCGRT	2217	Antigen_Processing_and_Presentation
PDIA3	2923	Antigen_Processing_and_Presentation
HFE	3077	Antigen_Processing_and_Presentation
HLA-A	3105	Antigen_Processing_and_Presentation
HLA-B	3106	Antigen_Processing_and_Presentation
HLA-C	3107	Antigen_Processing_and_Presentation
HLA-DMA	3108	Antigen_Processing_and_Presentation
HLA-DMB	3109	Antigen_Processing_and_Presentation
HLA-DOA	3111	Antigen_Processing_and_Presentation
HLA-DOB	3112	Antigen_Processing_and_Presentation
HLA-DPA1	3113	Antigen_Processing_and_Presentation
HLA-DPB1	3115	Antigen_Processing_and_Presentation
HLA-DQA1	3117	Antigen_Processing_and_Presentation
HLA-DQA2	3118	Antigen_Processing_and_Presentation
HLA-DQB1	3119	Antigen_Processing_and_Presentation
HLA-DRA	3122	Antigen_Processing_and_Presentation
HLA-DRB1	3123	Antigen_Processing_and_Presentation
HLA-DRB3	3125	Antigen_Processing_and_Presentation
HLA-DRB4	3126	Antigen_Processing_and_Presentation
HLA-DRB5	3127	Antigen_Processing_and_Presentation
HLA-E	3133	Antigen_Processing_and_Presentation
HLA-F	3134	Antigen_Processing_and_Presentation
HLA-G	3135	Antigen_Processing_and_Presentation
HLA-H	3136	Antigen_Processing_and_Presentation
MR1	3140	Antigen_Processing_and_Presentation
HSPA1A	3303	Antigen_Processing_and_Presentation
HSPA1B	3304	Antigen_Processing_and_Presentation
HSPA1L	3305	Antigen_Processing_and_Presentation
HSPA2	3306	Antigen_Processing_and_Presentation
HSPA4	3308	Antigen_Processing_and_Presentation
HSPA5	3309	Antigen_Processing_and_Presentation
HSPA6	3310	Antigen_Processing_and_Presentation
HSPA8	3312	Antigen_Processing_and_Presentation
HSP90AA1	3320	Antigen_Processing_and_Presentation
HSP90AB1	3326	Antigen_Processing_and_Presentation
ICAM1	3383	Antigen_Processing_and_Presentation
IFNA1	3439	Antigen_Processing_and_Presentation
IFNA2	3440	Antigen_Processing_and_Presentation
IFNA4	3441	Antigen_Processing_and_Presentation
IFNA5	3442	Antigen_Processing_and_Presentation
IFNA6	3443	Antigen_Processing_and_Presentation
IFNA7	3444	Antigen_Processing_and_Presentation
IFNA8	3445	Antigen_Processing_and_Presentation
IFNA10	3446	Antigen_Processing_and_Presentation
IFNA13	3447	Antigen_Processing_and_Presentation
IFNA14	3448	Antigen_Processing_and_Presentation
IFNA16	3449	Antigen_Processing_and_Presentation
IFNA17	3451	Antigen_Processing_and_Presentation
IFNA21	3452	Antigen_Processing_and_Presentation
IFNG	3458	Antigen_Processing_and_Presentation
KIR2DL1	3802	Antigen_Processing_and_Presentation
KIR2DL2	3803	Antigen_Processing_and_Presentation
KIR2DL3	3804	Antigen_Processing_and_Presentation
KIR2DL4	3805	Antigen_Processing_and_Presentation
KIR2DS1	3806	Antigen_Processing_and_Presentation
KIR2DS3	3808	Antigen_Processing_and_Presentation
KIR2DS4	3809	Antigen_Processing_and_Presentation
KIR2DS5	3810	Antigen_Processing_and_Presentation
KIR3DL1	3811	Antigen_Processing_and_Presentation
KIR3DL2	3812	Antigen_Processing_and_Presentation
KLRC1	3821	Antigen_Processing_and_Presentation
KLRC2	3822	Antigen_Processing_and_Presentation
KLRC3	3823	Antigen_Processing_and_Presentation
KLRD1	3824	Antigen_Processing_and_Presentation
LTA	4049	Antigen_Processing_and_Presentation
CIITA	4261	Antigen_Processing_and_Presentation
MICA	100507436	Antigen_Processing_and_Presentation
MICB	4277	Antigen_Processing_and_Presentation
NFYA	4800	Antigen_Processing_and_Presentation
NFYB	4801	Antigen_Processing_and_Presentation
NFYC	4802	Antigen_Processing_and_Presentation
LGMN	5641	Antigen_Processing_and_Presentation
PSMB8	5696	Antigen_Processing_and_Presentation
PSMC1	5700	Antigen_Processing_and_Presentation
PSMC2	5701	Antigen_Processing_and_Presentation
PSMC3	5702	Antigen_Processing_and_Presentation
PSMC4	5704	Antigen_Processing_and_Presentation
PSMC5	5705	Antigen_Processing_and_Presentation
PSMC6	5706	Antigen_Processing_and_Presentation
PSMD1	5707	Antigen_Processing_and_Presentation
PSMD2	5708	Antigen_Processing_and_Presentation
PSMD3	5709	Antigen_Processing_and_Presentation
PSMD4	5710	Antigen_Processing_and_Presentation
PSMD5	5711	Antigen_Processing_and_Presentation
PSMD7	5713	Antigen_Processing_and_Presentation
PSMD8	5714	Antigen_Processing_and_Presentation
PSMD10	5716	Antigen_Processing_and_Presentation
PSMD11	5717	Antigen_Processing_and_Presentation
PSMD13	5719	Antigen_Processing_and_Presentation
PSME1	5720	Antigen_Processing_and_Presentation
PSME2	5721	Antigen_Processing_and_Presentation
RELB	5971	Antigen_Processing_and_Presentation
RFX5	5993	Antigen_Processing_and_Presentation
RFXAP	5994	Antigen_Processing_and_Presentation
SLC10A2	6555	Antigen_Processing_and_Presentation
TAP1	6890	Antigen_Processing_and_Presentation
TAP2	6891	Antigen_Processing_and_Presentation
TAPBP	6892	Antigen_Processing_and_Presentation
THBS1	7057	Antigen_Processing_and_Presentation
SEM1	7979	Antigen_Processing_and_Presentation
KLRC4	8302	Antigen_Processing_and_Presentation
AP3B1	8546	Antigen_Processing_and_Presentation
RFXANK	8625	Antigen_Processing_and_Presentation
PSMD6	9861	Antigen_Processing_and_Presentation
PSME3	10197	Antigen_Processing_and_Presentation
PSMD14	10213	Antigen_Processing_and_Presentation
CLEC4M	10332	Antigen_Processing_and_Presentation
IFI30	10437	Antigen_Processing_and_Presentation
PROCR	10544	Antigen_Processing_and_Presentation
ADRM1	11047	Antigen_Processing_and_Presentation
ECPAS	23392	Antigen_Processing_and_Presentation
TRPC4AP	26133	Antigen_Processing_and_Presentation
CD209	30835	Antigen_Processing_and_Presentation
UBXN1	51035	Antigen_Processing_and_Presentation
ERAP1	51752	Antigen_Processing_and_Presentation
TAPBPL	55080	Antigen_Processing_and_Presentation
KIR2DL5A	57292	Antigen_Processing_and_Presentation
ERAP2	64167	Antigen_Processing_and_Presentation
ULBP3	79465	Antigen_Processing_and_Presentation
ULBP2	80328	Antigen_Processing_and_Presentation
ULBP1	80329	Antigen_Processing_and_Presentation
KIR3DL3	115653	Antigen_Processing_and_Presentation
RAET1E	135250	Antigen_Processing_and_Presentation
RAET1L	154064	Antigen_Processing_and_Presentation
UBR1	197131	Antigen_Processing_and_Presentation
RAET1G	353091	Antigen_Processing_and_Presentation
PDIA2	64714	Antigen_Processing_and_Presentation
HAMP	57817	Antimicrobials
PI3	5266	Antimicrobials
CAMP	820	Antimicrobials
DEFB4A	1673	Antimicrobials
PPBP	5473	Antimicrobials
REG3G	130120	Antimicrobials
CXCL14	9547	Antimicrobials
CXCL16	58191	Antimicrobials
SLPI	6590	Antimicrobials
CXCL8	3576	Antimicrobials
CXCL10	3627	Antimicrobials
CXCL9	4283	Antimicrobials
CXCL5	6374	Antimicrobials
CXCL11	6373	Antimicrobials
CXCL6	6372	Antimicrobials
CXCL1	2919	Antimicrobials
CXCL12	6387	Antimicrobials
CXCL13	10563	Antimicrobials
CXCL2	2920	Antimicrobials
PF4	5196	Antimicrobials
XCL1	6375	Antimicrobials
CXCL3	2921	Antimicrobials
DEFB103B	55894	Antimicrobials
CCL13	6357	Antimicrobials
CCL1	6346	Antimicrobials
DEFB1	1672	Antimicrobials
CCL8	6355	Antimicrobials
ELANE	1991	Antimicrobials
DEFB103A	414325	Antimicrobials
DEFA3	1668	Antimicrobials
DEFA1	1667	Antimicrobials
TMSB10	9168	Antimicrobials
DEFA6	1671	Antimicrobials
DEFA5	1670	Antimicrobials
DEFA4	1669	Antimicrobials
LCN2	3934	Antimicrobials
LCN1	3933	Antimicrobials
COLEC10	10584	Antimicrobials
BPI	671	Antimicrobials
S100A9	6280	Antimicrobials
S100A8	6279	Antimicrobials
DCD	117159	Antimicrobials
LCN6	158062	Antimicrobials
S100A12	6283	Antimicrobials
HTN3	3347	Antimicrobials
LCN8	138307	Antimicrobials
DEFA1B	728358	Antimicrobials
CCR10	2826	Antimicrobials
CELA1	1990	Antimicrobials
DEFB106A	245909	Antimicrobials
PENK	5179	Antimicrobials
BPIFC	254240	Antimicrobials
MMP12	4321	Antimicrobials
BPIFB6	128859	Antimicrobials
LEAP2	116842	Antimicrobials
SFTPD	6441	Antimicrobials
LCN9	392399	Antimicrobials
BPIFB2	80341	Antimicrobials
PTGDS	5730	Antimicrobials
TMSB4X	7114	Antimicrobials
PGLYRP1	8993	Antimicrobials
ZC3HAV1	56829	Antimicrobials
TMSB15A	11013	Antimicrobials
S100B	6285	Antimicrobials
S100A13	6284	Antimicrobials
S100A6	6277	Antimicrobials
DEFB119	245932	Antimicrobials
DEFB107A	245910	Antimicrobials
DEFB105A	245908	Antimicrobials
SERPIND1	3053	Antimicrobials
DEFB129	140881	Antimicrobials
DEFB127	140850	Antimicrobials
S100P	6286	Antimicrobials
S100A7	6278	Antimicrobials
DEFB104A	140596	Antimicrobials
DEFB126	81623	Antimicrobials
DEFB106B	503841	Antimicrobials
DEFB104B	503618	Antimicrobials
DEFB107B	503614	Antimicrobials
PGLYRP3	114771	Antimicrobials
PGLYRP2	114770	Antimicrobials
S100A10	6281	Antimicrobials
S100A2	6273	Antimicrobials
DEFB125	245938	Antimicrobials
DEFB123	245936	Antimicrobials
DEFB105B	504180	Antimicrobials
DEFB132	400830	Antimicrobials
BPIFB3	359710	Antimicrobials
LCN12	286256	Antimicrobials
PGLYRP4	57115	Antimicrobials
S100A11	6282	Antimicrobials
S100A5	6276	Antimicrobials
S100A3	6274	Antimicrobials
S100A1	6271	Antimicrobials
DEFB128	245939	Antimicrobials
DEFB108B	245911	Antimicrobials
HTN1	3346	Antimicrobials
LMBR1L	55716	Antimicrobials
S100A7A	338324	Antimicrobials
DEFB118	117285	Antimicrobials
COLEC12	81035	Antimicrobials
TMSB4Y	9087	Antimicrobials
DEFB131A	644414	Antimicrobials
DEFB134	613211	Antimicrobials
DEFB130A	245940	Antimicrobials
DEFB124	245937	Antimicrobials
DEFB121	245934	Antimicrobials
DEFB116	245930	Antimicrobials
DEFB115	245929	Antimicrobials
DEFB114	245928	Antimicrobials
DEFB113	245927	Antimicrobials
DEFB112	245915	Antimicrobials
DEFB110	245913	Antimicrobials
TMSB15B	286527	Antimicrobials
DEFB133	403339	Antimicrobials
S100Z	170591	Antimicrobials
MAVS	57506	Antimicrobials
TMSB4XP8	7117	Antimicrobials
S100A14	57402	Antimicrobials
LCN10	414332	Antimicrobials
S100A16	140576	Antimicrobials
DEFB136	613210	Antimicrobials
DEFB135	613209	Antimicrobials
DEFB117	245931	Antimicrobials
ZC3HAV1L	92092	Antimicrobials
S100A7L2	645922	Antimicrobials
MBL3P	50639	Antimicrobials
DEFB4B	100289462	Antimicrobials
BPIFB4	149954	Antimicrobials
IFNAR1	3454	Antimicrobials
AZU1	566	Antimicrobials
DEFB131B	100129216	Antimicrobials
DEFA1A3	613253	Antimicrobials
LCN1P1	286310	Antimicrobials
S100G	795	Antimicrobials
DEFA7P	724067	Antimicrobials
DEFB130B	100133267	Antimicrobials
DEFB108F	100133128	Antimicrobials
DEFB131C	100128174	Antimicrobials
TCHHL1	126637	Antimicrobials
TINAGL1	64129	Antimicrobials
IFNGR1	3459	Antimicrobials
SLC22A17	51310	Antimicrobials
WFIKKN1	117166	Antimicrobials
WFDC2	10406	Antimicrobials
IL6	3569	Antimicrobials
UMODL1	89766	Antimicrobials
TGFB1	7040	Antimicrobials
PF4V1	5197	Antimicrobials
MMP9	4318	Antimicrobials
ANOS1	3730	Antimicrobials
TLR4	7099	Antimicrobials
SPAG11B	10407	Antimicrobials
A2M	2	Antimicrobials
NFKB1	4790	Antimicrobials
APOBEC3G	60489	Antimicrobials
FABP6	2172	Antimicrobials
NOD2	64127	Antimicrobials
MBL2	4153	Antimicrobials
SFTPA1	653509	Antimicrobials
RBP1	5947	Antimicrobials
TLR2	7097	Antimicrobials
SLC40A1	30061	Antimicrobials
PLAU	5328	Antimicrobials
IL1B	3553	Antimicrobials
PAEP	5047	Antimicrobials
HJV	148738	Antimicrobials
MUC5AC	4586	Antimicrobials
OBP2A	29991	Antimicrobials
PLTP	5360	Antimicrobials
MX1	4599	Antimicrobials
DDX58	23586	Antimicrobials
IFNL1	282618	Antimicrobials
IRF3	3661	Antimicrobials
SFTPA2	729238	Antimicrobials
LPA	4018	Antimicrobials
LBP	3929	Antimicrobials
RBP4	5950	Antimicrobials
NOX4	50507	Antimicrobials
LTF	4057	Antimicrobials
IFNB1	3456	Antimicrobials
RBP5	83758	Antimicrobials
FABP7	2173	Antimicrobials
FABP5	2171	Antimicrobials
FABP3	2170	Antimicrobials
FABP2	2169	Antimicrobials
FABP4	2167	Antimicrobials
R3HDML	140902	Antimicrobials
BPIFA3	128861	Antimicrobials
BPIFB1	92747	Antimicrobials
OASL	8638	Antimicrobials
CRABP2	1382	Antimicrobials
CRABP1	1381	Antimicrobials
RBP7	116362	Antimicrobials
DUOX1	53905	Antimicrobials
OBP2B	29989	Antimicrobials
RBP2	5948	Antimicrobials
LCN15	389812	Antimicrobials
CETP	1071	Antimicrobials
FABP12	646486	Antimicrobials
FABP9	646480	Antimicrobials
BPIFA1	51297	Antimicrobials
LCNL1	401562	Antimicrobials
C8G	733	Antimicrobials
SPAG11A	653423	Antimicrobials
PI15	51050	Antimicrobials
NOX1	27035	Antimicrobials
PMP2	5375	Antimicrobials
APOD	347	Antimicrobials
ORM2	5005	Antimicrobials
ORM1	5004	Antimicrobials
TNF	7124	Antimicrobials
CTSG	1511	Antimicrobials
PRTN3	5657	Antimicrobials
MAPK1	5594	Antimicrobials
PML	5371	Antimicrobials
AEN	64782	Antimicrobials
CYBB	1536	Antimicrobials
BPIFA2	140683	Antimicrobials
ISG20	3669	Antimicrobials
BCL3	602	Antimicrobials
ISG20L2	81875	Antimicrobials
NOX5	79400	Antimicrobials
NOX3	50508	Antimicrobials
DUOX2	50506	Antimicrobials
TLR3	7098	Antimicrobials
TFRC	7037	Antimicrobials
IFIH1	64135	Antimicrobials
LRP1	4035	Antimicrobials
TRIM5	85363	Antimicrobials
IDO1	3620	Antimicrobials
GDF15	9518	Antimicrobials
NEDD4	4734	Antimicrobials
ADIPOQ	9370	Antimicrobials
STAT3	6774	Antimicrobials
STAT1	6772	Antimicrobials
IFNL2	282616	Antimicrobials
SOCS3	9021	Antimicrobials
SEMG1	6406	Antimicrobials
TNFSF10	8743	Antimicrobials
CCL20	6364	Antimicrobials
SOCS1	8651	Antimicrobials
RNASEL	6041	Antimicrobials
IRF1	3659	Antimicrobials
IL15	3600	Antimicrobials
APOBEC3F	200316	Antimicrobials
PLAAT4	5920	Antimicrobials
CHIT1	1118	Antimicrobials
CD40	958	Antimicrobials
TLR7	51284	Antimicrobials
PPIA	5478	Antimicrobials
ZYX	7791	Antimicrobials
NLRX1	79671	Antimicrobials
PGC	5225	Antimicrobials
VEGFA	7422	Antimicrobials
IKBKE	9641	Antimicrobials
ISG15	9636	Antimicrobials
DHX58	79132	Antimicrobials
TNFAIP3	7128	Antimicrobials
TFR2	7036	Antimicrobials
FCN2	2220	Antimicrobials
MUC4	4585	Antimicrobials
F2R	2149	Antimicrobials
ELN	2006	Antimicrobials
IL27	246778	Antimicrobials
MAPT	4137	Antimicrobials
LYZ	4069	Antimicrobials
CCL5	6352	Antimicrobials
LEP	3952	Antimicrobials
CYLD	1540	Antimicrobials
KLKB1	3818	Antimicrobials
CST4	1472	Antimicrobials
CSRP1	1465	Antimicrobials
MAPK14	1432	Antimicrobials
JUN	3725	Antimicrobials
ITGAV	3685	Antimicrobials
IRF5	3663	Antimicrobials
CCR6	1235	Antimicrobials
IL12B	3593	Antimicrobials
TLR8	51311	Antimicrobials
GNLY	10578	Antimicrobials
CD81	975	Antimicrobials
EIF2AK2	5610	Antimicrobials
APOM	55937	Antimicrobials
CACYBP	27101	Antimicrobials
NOD1	10392	Antimicrobials
MAPK8	5599	Antimicrobials
MAPK3	5595	Antimicrobials
BST2	684	Antimicrobials
BPHL	670	Antimicrobials
PLA2G2A	5320	Antimicrobials
GRN	2896	Antimicrobials
NEWENTRY	192343	Antimicrobials
PDGFRA	5156	Antimicrobials
GNAI1	2770	Antimicrobials
WNT5A	7474	Antimicrobials
FURIN	5045	Antimicrobials
ADAR	103	Antimicrobials
TYK2	7297	Antimicrobials
NOS2	4843	Antimicrobials
TRAF3	7187	Antimicrobials
TPT1	7178	Antimicrobials
TPM2	7169	Antimicrobials
NEO1	4756	Antimicrobials
AHNAK	79026	Antimicrobials
TLR1	7096	Antimicrobials
TK2	7084	Antimicrobials
PRDX2	7001	Antimicrobials
MX2	4600	Antimicrobials
FGF2	2247	Antimicrobials
FGA	2243	Antimicrobials
TCF7L2	6934	Antimicrobials
F2RL1	2150	Antimicrobials
TKFC	26007	Antimicrobials
MSR1	4481	Antimicrobials
NFKBIZ	64332	Antimicrobials
LMBR1	64327	Antimicrobials
EPPIN	57119	Antimicrobials
SRC	6714	Antimicrobials
MPO	4353	Antimicrobials
ELAVL1	1994	Antimicrobials
ROBO3	64221	Antimicrobials
SP1	6667	Antimicrobials
SOD1	6647	Antimicrobials
PDF	64146	Antimicrobials
DLL4	54567	Antimicrobials
ECD	11319	Antimicrobials
SLC11A1	6556	Antimicrobials
DMBT1	1755	Antimicrobials
STING1	340061	Antimicrobials
SKIV2L	6499	Antimicrobials
SEMG2	6407	Antimicrobials
DES	1674	Antimicrobials
DCK	1633	Antimicrobials
DAXX	1616	Antimicrobials
TNFRSF10A	8797	Antimicrobials
TNFRSF10B	8795	Antimicrobials
EED	8726	Antimicrobials
CCL4	6351	Antimicrobials
LIMS1	3987	Antimicrobials
LALBA	3906	Antimicrobials
APOBEC3H	164668	Antimicrobials
TMPRSS6	164656	Antimicrobials
SPINK5	11005	Antimicrobials
MARCO	8685	Antimicrobials
BECN1	8678	Antimicrobials
TNFSF11	8600	Antimicrobials
KNG1	3827	Antimicrobials
CSK	1445	Antimicrobials
KLRK1	22914	Antimicrobials
KCNH2	3757	Antimicrobials
JUND	3727	Antimicrobials
JAK1	3716	Antimicrobials
CLDN4	1364	Antimicrobials
CCL28	56477	Antimicrobials
RNASE3	6037	Antimicrobials
RN7SL1	6029	Antimicrobials
IRF7	3665	Antimicrobials
IREB2	3658	Antimicrobials
ILK	3611	Antimicrobials
IL18	3606	Antimicrobials
IL17A	3605	Antimicrobials
LTB4R	1241	Antimicrobials
APOBEC3A	200315	Antimicrobials
MASP2	10747	Antimicrobials
TRIM27	5987	Antimicrobials
RELA	5970	Antimicrobials
IL7R	3575	Antimicrobials
IL1A	3552	Antimicrobials
PTX3	5806	Antimicrobials
IFNAR2	3455	Antimicrobials
IFN1@	3438	Antimicrobials
SYTL1	84958	Antimicrobials
APOBEC3C	27350	Antimicrobials
DDX17	10521	Antimicrobials
PTGS2	5743	Antimicrobials
HTR1A	3350	Antimicrobials
SEPTIN7	989	Antimicrobials
CD40LG	959	Antimicrobials
CD14	929	Antimicrobials
MASP1	5648	Antimicrobials
PROC	5624	Antimicrobials
MAP2K2	5605	Antimicrobials
MAP2K1	5604	Antimicrobials
HRG	3273	Antimicrobials
NDRG1	10397	Antimicrobials
IRF9	10379	Antimicrobials
TRIM22	10346	Antimicrobials
LANCL1	10314	Antimicrobials
PPP4C	5531	Antimicrobials
HMOX1	3162	Antimicrobials
HMGB1	3146	Antimicrobials
RNASE7	84659	Antimicrobials
ABCC4	10257	Antimicrobials
HGF	3082	Antimicrobials
HDAC1	3065	Antimicrobials
IFNLR1	163702	Antimicrobials
PLSCR1	5359	Antimicrobials
BACH2	60468	Antimicrobials
TANK	10010	Antimicrobials
PIK3CG	5294	Antimicrobials
ARRB1	408	Antimicrobials
RSAD2	91543	Antimicrobials
STAB2	55576	Antimicrobials
TBK1	29110	Antimicrobials
PDYN	5173	Antimicrobials
PDGFRB	5159	Antimicrobials
PDCD1	5133	Antimicrobials
PCSK2	5126	Antimicrobials
PCSK1	5122	Antimicrobials
ARG2	384	Antimicrobials
AQP9	366	Antimicrobials
FASLG	356	Antimicrobials
APOH	350	Antimicrobials
BIRC5	332	Antimicrobials
ANXA6	309	Antimicrobials
IL22	50616	Antimicrobials
VTN	7448	Antimicrobials
VIM	7431	Antimicrobials
VCAM1	7412	Antimicrobials
PRDX1	5052	Antimicrobials
GFAP	2670	Antimicrobials
GBP2	2634	Antimicrobials
ALB	213	Antimicrobials
SLC29A3	55315	Antimicrobials
OAS1	4938	Antimicrobials
AGER	177	Antimicrobials
UNC93B1	81622	Antimicrobials
TNFSF4	7292	Antimicrobials
NOS1	4842	Antimicrobials
ACTG1	71	Antimicrobials
ACTA1	58	Antimicrobials
ACO1	48	Antimicrobials
SERPINA3	12	Antimicrobials
CXCR1	3577	Antimicrobials
CCL15	6359	Antimicrobials
CCL14	6358	Antimicrobials
CCL16	6360	Antimicrobials
CCL19	6363	Antimicrobials
CCL18	6362	Antimicrobials
CCL17	6361	Antimicrobials
CCL26	10344	Antimicrobials
CCL22	6367	Antimicrobials
CCR3	1232	Antimicrobials
CCL4L1	388372	Antimicrobials
ACKR2	1238	Antimicrobials
CCR7	1236	Antimicrobials
CCL27	10850	Antimicrobials
CCR8	1237	Antimicrobials
ACKR4	51554	Antimicrobials
CCL2	6347	Antimicrobials
CCL21	6366	Antimicrobials
CCL7	6354	Antimicrobials
CCL3	6348	Antimicrobials
CCL11	6356	Antimicrobials
CCR5	1234	Antimicrobials
CCL23	6368	Antimicrobials
CCL25	6370	Antimicrobials
CCL3L3	414062	Antimicrobials
CCL4L2	9560	Antimicrobials
CCL3L1	6349	Antimicrobials
CCR1	1230	Antimicrobials
CCL24	6369	Antimicrobials
XCL2	6846	Antimicrobials
CXCR4	7852	Antimicrobials
CXCR6	10663	Antimicrobials
CCR4	1233	Antimicrobials
TAFA5	25817	Antimicrobials
TAFA3	284467	Antimicrobials
TAFA4	151647	Antimicrobials
TAFA1	407738	Antimicrobials
TAFA2	338811	Antimicrobials
CCL15-CCL14	348249	Antimicrobials
PTK2B	2185	Antimicrobials
IL4	3565	Antimicrobials
CDH1	999	Antimicrobials
LTBP1	4052	Antimicrobials
IL13	3596	Antimicrobials
IL10	3586	Antimicrobials
IL2	3558	Antimicrobials
PPARG	5468	Antimicrobials
FGR	2268	Antimicrobials
MIF	4282	Antimicrobials
CRP	1401	Antimicrobials
JAK2	3717	Antimicrobials
PTK2	5747	Antimicrobials
PTGDR	5729	Antimicrobials
CD86	942	Antimicrobials
HCK	3055	Antimicrobials
VDR	7421	Antimicrobials
OLR1	4973	Antimicrobials
GRK2	156	Antimicrobials
TXK	7294	Antimicrobials
RNASE2	6036	Antimicrobials
CD79A	973	BCRSignalingPathway
CD79B	974	BCRSignalingPathway
LYN	4067	BCRSignalingPathway
SYK	6850	BCRSignalingPathway
BTK	695	BCRSignalingPathway
BLNK	29760	BCRSignalingPathway
VAV3	10451	BCRSignalingPathway
VAV1	7409	BCRSignalingPathway
VAV2	7410	BCRSignalingPathway
RAC1	5879	BCRSignalingPathway
RAC2	5880	BCRSignalingPathway
RAC3	5881	BCRSignalingPathway
PPP3CA	5530	BCRSignalingPathway
PPP3CB	5532	BCRSignalingPathway
PPP3CC	5533	BCRSignalingPathway
CHP1	11261	BCRSignalingPathway
PPP3R1	5534	BCRSignalingPathway
PPP3R2	5535	BCRSignalingPathway
CHP2	63928	BCRSignalingPathway
NFAT5	10725	BCRSignalingPathway
NFATC1	4772	BCRSignalingPathway
NFATC2	4773	BCRSignalingPathway
NFATC3	4775	BCRSignalingPathway
NFATC4	4776	BCRSignalingPathway
HRAS	3265	BCRSignalingPathway
KRAS	3845	BCRSignalingPathway
NRAS	4893	BCRSignalingPathway
FOS	2353	BCRSignalingPathway
CARD11	84433	BCRSignalingPathway
BCL10	8915	BCRSignalingPathway
MALT1	10892	BCRSignalingPathway
CHUK	1147	BCRSignalingPathway
IKBKB	3551	BCRSignalingPathway
IKBKG	8517	BCRSignalingPathway
NFKBIA	4792	BCRSignalingPathway
NFKBIB	4793	BCRSignalingPathway
NFKBIE	4794	BCRSignalingPathway
CD19	930	BCRSignalingPathway
CR2	1380	BCRSignalingPathway
PIK3R5	23533	BCRSignalingPathway
PIK3R1	5295	BCRSignalingPathway
PIK3R2	5296	BCRSignalingPathway
PIK3R3	8503	BCRSignalingPathway
PIK3CA	5290	BCRSignalingPathway
PIK3CB	5291	BCRSignalingPathway
PIK3CD	5293	BCRSignalingPathway
AKT3	10000	BCRSignalingPathway
AKT1	207	BCRSignalingPathway
AKT2	208	BCRSignalingPathway
GSK3B	2932	BCRSignalingPathway
INPP5D	3635	BCRSignalingPathway
CD22	933	BCRSignalingPathway
CD72	971	BCRSignalingPathway
PTPN6	5777	BCRSignalingPathway
LILRB3	11025	BCRSignalingPathway
FCGR2B	2213	BCRSignalingPathway
RASGRP3	25780	BCRSignalingPathway
PLCG2	5336	BCRSignalingPathway
PRKCB	5579	BCRSignalingPathway
IFITM1	8519	BCRSignalingPathway
IGH	3492	BCRSignalingPathway
IGHA1	3493	BCRSignalingPathway
IGHA2	3494	BCRSignalingPathway
IGHD	3495	BCRSignalingPathway
IGHD1-1	28510	BCRSignalingPathway
IGHD1-14	28508	BCRSignalingPathway
IGHD1-20	28507	BCRSignalingPathway
IGHD1-26	28506	BCRSignalingPathway
IGHD1-7	28509	BCRSignalingPathway
IGHD2-15	28503	BCRSignalingPathway
IGHD2-2	28505	BCRSignalingPathway
IGHD2-21	28502	BCRSignalingPathway
IGHD2-8	28504	BCRSignalingPathway
IGHD3-10	28499	BCRSignalingPathway
IGHD3-16	28498	BCRSignalingPathway
IGHD3-22	28497	BCRSignalingPathway
IGHD3-3	28501	BCRSignalingPathway
IGHD3-9	28500	BCRSignalingPathway
IGHD4-11	28495	BCRSignalingPathway
IGHD4-17	28494	BCRSignalingPathway
IGHD4-23	28493	BCRSignalingPathway
IGHD4-4	28496	BCRSignalingPathway
IGHD5-12	28491	BCRSignalingPathway
IGHD5-18	28490	BCRSignalingPathway
IGHD5-24	28489	BCRSignalingPathway
IGHD5-5	28492	BCRSignalingPathway
IGHD6-13	28487	BCRSignalingPathway
IGHD6-19	28486	BCRSignalingPathway
IGHD6-25	28485	BCRSignalingPathway
IGHD6-6	28488	BCRSignalingPathway
IGHD7-27	28484	BCRSignalingPathway
IGHE	3497	BCRSignalingPathway
IGHG1	3500	BCRSignalingPathway
IGHG2	3501	BCRSignalingPathway
IGHG3	3502	BCRSignalingPathway
IGHG4	3503	BCRSignalingPathway
IGHJ1	28483	BCRSignalingPathway
IGHJ2	28481	BCRSignalingPathway
IGHJ3	28479	BCRSignalingPathway
IGHJ4	28477	BCRSignalingPathway
IGHJ5	28476	BCRSignalingPathway
IGHJ6	28475	BCRSignalingPathway
IGHM	3507	BCRSignalingPathway
IGHV1-18	28468	BCRSignalingPathway
IGHV1-2	28474	BCRSignalingPathway
IGHV1-24	28467	BCRSignalingPathway
IGHV1-3	28473	BCRSignalingPathway
IGHV1-45	28466	BCRSignalingPathway
IGHV1-46	28465	BCRSignalingPathway
IGHV1-58	28464	BCRSignalingPathway
IGHV1-69	28461	BCRSignalingPathway
IGHV1-8	28472	BCRSignalingPathway
IGHV1-38-4	28460	BCRSignalingPathway
IGHV1-69-2	28458	BCRSignalingPathway
IGHV2-26	28455	BCRSignalingPathway
IGHV2-5	28457	BCRSignalingPathway
IGHV2-70	28454	BCRSignalingPathway
IGHV3-11	28450	BCRSignalingPathway
IGHV3-13	28449	BCRSignalingPathway
IGHV3-15	28448	BCRSignalingPathway
IGHV3-16	28447	BCRSignalingPathway
IGHV3-20	28445	BCRSignalingPathway
IGHV3-21	28444	BCRSignalingPathway
IGHV3-23	28442	BCRSignalingPathway
IGHV3-30	28439	BCRSignalingPathway
IGHV3-30-3	57290	BCRSignalingPathway
IGHV3-30-5	89770	BCRSignalingPathway
IGHV3-33	28434	BCRSignalingPathway
IGHV3-35	28432	BCRSignalingPathway
IGHV3-38	28429	BCRSignalingPathway
IGHV3-43	28426	BCRSignalingPathway
IGHV3-48	28424	BCRSignalingPathway
IGHV3-49	28423	BCRSignalingPathway
IGHV3-53	28420	BCRSignalingPathway
IGHV3-64	28414	BCRSignalingPathway
IGHV3-66	28412	BCRSignalingPathway
IGHV3-7	28452	BCRSignalingPathway
IGHV3-72	28410	BCRSignalingPathway
IGHV3-73	28409	BCRSignalingPathway
IGHV3-74	28408	BCRSignalingPathway
IGHV3-9	28451	BCRSignalingPathway
IGHV3-38-3	28404	BCRSignalingPathway
IGHV3-69-1	28402	BCRSignalingPathway
IGHV4-28	28400	BCRSignalingPathway
IGHV4-30-1	28399	BCRSignalingPathway
IGHV4-30-2	28398	BCRSignalingPathway
IGHV4-30-4	28397	BCRSignalingPathway
IGHV4-31	28396	BCRSignalingPathway
IGHV4-34	28395	BCRSignalingPathway
IGHV4-39	28394	BCRSignalingPathway
IGHV4-4	28401	BCRSignalingPathway
IGHV4-59	28392	BCRSignalingPathway
IGHV4-61	28391	BCRSignalingPathway
IGHV4-38-2	28389	BCRSignalingPathway
IGHV5-51	28388	BCRSignalingPathway
IGHV5-10-1	28386	BCRSignalingPathway
IGHV6-1	28385	BCRSignalingPathway
IGHV7-4-1	57289	BCRSignalingPathway
IGHV7-81	28378	BCRSignalingPathway
IGK	50802	BCRSignalingPathway
IGKC	3514	BCRSignalingPathway
IGKDEL	3515	BCRSignalingPathway
IGKJ	7842	BCRSignalingPathway
IGKJ1	28950	BCRSignalingPathway
IGKJ2	28949	BCRSignalingPathway
IGKJ3	28948	BCRSignalingPathway
IGKJ4	28947	BCRSignalingPathway
IGKJ5	28946	BCRSignalingPathway
IGKV@	3519	BCRSignalingPathway
IGKV1-12	28940	BCRSignalingPathway
IGKV1-13	28939	BCRSignalingPathway
IGKV1-16	28938	BCRSignalingPathway
IGKV1-17	28937	BCRSignalingPathway
IGKV1-27	28935	BCRSignalingPathway
IGKV1-33	28933	BCRSignalingPathway
IGKV1-37	28931	BCRSignalingPathway
IGKV1-39	28930	BCRSignalingPathway
IGKV1-5	28299	BCRSignalingPathway
IGKV1-6	28943	BCRSignalingPathway
IGKV1-8	28942	BCRSignalingPathway
IGKV1-9	28941	BCRSignalingPathway
IGKV1D-12	28903	BCRSignalingPathway
IGKV1D-13	28902	BCRSignalingPathway
IGKV1D-16	28901	BCRSignalingPathway
IGKV1D-17	28900	BCRSignalingPathway
IGKV1D-33	28896	BCRSignalingPathway
IGKV1D-37	28894	BCRSignalingPathway
IGKV1D-39	28893	BCRSignalingPathway
IGKV1D-42	28892	BCRSignalingPathway
IGKV1D-43	28891	BCRSignalingPathway
IGKV1D-8	28904	BCRSignalingPathway
IGKV2-24	28923	BCRSignalingPathway
IGKV2-28	28921	BCRSignalingPathway
IGKV2-30	28919	BCRSignalingPathway
IGKV2-40	28916	BCRSignalingPathway
IGKV2D-24	28885	BCRSignalingPathway
IGKV2D-28	28883	BCRSignalingPathway
IGKV2D-29	28882	BCRSignalingPathway
IGKV2D-30	28881	BCRSignalingPathway
IGKV2D-40	28878	BCRSignalingPathway
IGKV3-11	28914	BCRSignalingPathway
IGKV3-15	28913	BCRSignalingPathway
IGKV3-20	28912	BCRSignalingPathway
IGKV3-7	28915	BCRSignalingPathway
IGKV3D-11	28876	BCRSignalingPathway
IGKV3D-15	28875	BCRSignalingPathway
IGKV3D-20	28874	BCRSignalingPathway
IGKV3D-7	28877	BCRSignalingPathway
IGKV4-1	28908	BCRSignalingPathway
IGKV5-2	28907	BCRSignalingPathway
IGKV6-21	28906	BCRSignalingPathway
IGKV6D-21	28870	BCRSignalingPathway
IGKV6D-41	28869	BCRSignalingPathway
IGL	3535	BCRSignalingPathway
IGLC1	3537	BCRSignalingPathway
IGLC2	3538	BCRSignalingPathway
IGLC3	3539	BCRSignalingPathway
IGLC6	3542	BCRSignalingPathway
IGLC7	28834	BCRSignalingPathway
IGLJ	8217	BCRSignalingPathway
IGLJ1	28833	BCRSignalingPathway
IGLJ2	28832	BCRSignalingPathway
IGLJ3	28831	BCRSignalingPathway
IGLJ4	28830	BCRSignalingPathway
IGLJ5	28829	BCRSignalingPathway
IGLJ6	28828	BCRSignalingPathway
IGLJ7	28827	BCRSignalingPathway
IGLV@	3546	BCRSignalingPathway
IGLV1-36	28826	BCRSignalingPathway
IGLV1-40	28825	BCRSignalingPathway
IGLV1-44	28823	BCRSignalingPathway
IGLV1-47	28822	BCRSignalingPathway
IGLV1-50	28821	BCRSignalingPathway
IGLV1-51	28820	BCRSignalingPathway
IGLV10-54	28772	BCRSignalingPathway
IGLV11-55	28770	BCRSignalingPathway
IGLV2-11	28816	BCRSignalingPathway
IGLV2-14	28815	BCRSignalingPathway
IGLV2-18	28814	BCRSignalingPathway
IGLV2-23	28813	BCRSignalingPathway
IGLV2-33	28811	BCRSignalingPathway
IGLV2-8	28817	BCRSignalingPathway
IGLV3-1	28809	BCRSignalingPathway
IGLV3-10	28803	BCRSignalingPathway
IGLV3-12	28802	BCRSignalingPathway
IGLV3-16	28799	BCRSignalingPathway
IGLV3-19	28797	BCRSignalingPathway
IGLV3-21	28796	BCRSignalingPathway
IGLV3-22	28795	BCRSignalingPathway
IGLV3-25	28793	BCRSignalingPathway
IGLV3-27	28791	BCRSignalingPathway
IGLV3-32	28787	BCRSignalingPathway
IGLV3-9	28804	BCRSignalingPathway
IGLV4-3	28786	BCRSignalingPathway
IGLV4-60	28785	BCRSignalingPathway
IGLV4-69	28784	BCRSignalingPathway
IGLV5-37	28783	BCRSignalingPathway
IGLV5-39	28782	BCRSignalingPathway
IGLV5-45	28781	BCRSignalingPathway
IGLV5-48	28780	BCRSignalingPathway
IGLV5-52	28779	BCRSignalingPathway
IGLV6-57	28778	BCRSignalingPathway
IGLV7-43	28776	BCRSignalingPathway
IGLV7-46	28775	BCRSignalingPathway
IGLV8-61	28774	BCRSignalingPathway
IGLV9-49	28773	BCRSignalingPathway
C3	718	Chemokines
C5	727	Chemokines
CCL3P1	390788	Chemokines
CKLF	51192	Chemokines
CMA1	1215	Chemokines
CX3CL1	6376	Chemokines
CXCL17	284340	Chemokines
CCN1	3491	Chemokines
EDN1	1906	Chemokines
EDN2	1907	Chemokines
EDN3	1908	Chemokines
FGF10	2255	Chemokines
LECT2	3950	Chemokines
PPBPP1	728045	Chemokines
PROK2	60675	Chemokines
SAA1	6288	Chemokines
SAA2	6289	Chemokines
SBDS	51119	Chemokines
SEMA3A	10371	Chemokines
SEMA3B	7869	Chemokines
SEMA3C	10512	Chemokines
SEMA3D	223117	Chemokines
SEMA3E	9723	Chemokines
SEMA3F	6405	Chemokines
SEMA3G	56920	Chemokines
SEMA4A	64218	Chemokines
SEMA4B	10509	Chemokines
SEMA4C	54910	Chemokines
SEMA4D	10507	Chemokines
SEMA4F	10505	Chemokines
SEMA4G	57715	Chemokines
SEMA5A	9037	Chemokines
SEMA5B	54437	Chemokines
SEMA6A	57556	Chemokines
SEMA6B	10501	Chemokines
SEMA6C	10500	Chemokines
SEMA6D	80031	Chemokines
SEMA7A	8482	Chemokines
SLIT1	6585	Chemokines
SLIT2	9353	Chemokines
TNC	3371	Chemokines
TYMP	1890	Chemokines
C5AR1	728	Chemokine_Receptors
CCR9	10803	Chemokine_Receptors
CCRL2	9034	Chemokine_Receptors
CMKLR1	1240	Chemokine_Receptors
CX3CR1	1524	Chemokine_Receptors
CXCR3	2833	Chemokine_Receptors
CXCR5	643	Chemokine_Receptors
ACKR3	57007	Chemokine_Receptors
CYSLTR1	10800	Chemokine_Receptors
CYSLTR2	57105	Chemokine_Receptors
ACKR1	2532	Chemokine_Receptors
EDNRA	1909	Chemokine_Receptors
EDNRB	1910	Chemokine_Receptors
FPR1	2357	Chemokine_Receptors
FPR2	2358	Chemokine_Receptors
GPR17	2840	Chemokine_Receptors
GPR32	2854	Chemokine_Receptors
GPR33	2856	Chemokine_Receptors
PTGDR2	11251	Chemokine_Receptors
C5AR2	27202	Chemokine_Receptors
CXCR2	3579	Chemokine_Receptors
LTB4R2	56413	Chemokine_Receptors
PLAUR	5329	Chemokine_Receptors
PLXNA1	5361	Chemokine_Receptors
PLXNA2	5362	Chemokine_Receptors
PLXNA3	55558	Chemokine_Receptors
PLXNA4	91584	Chemokine_Receptors
PLXNB1	5364	Chemokine_Receptors
PLXNB2	23654	Chemokine_Receptors
PLXNB3	5365	Chemokine_Receptors
PLXNC1	10154	Chemokine_Receptors
PLXND1	23129	Chemokine_Receptors
PTAFR	5724	Chemokine_Receptors
ROBO1	6091	Chemokine_Receptors
ROBO2	6092	Chemokine_Receptors
RXFP3	51289	Chemokine_Receptors
XCR1	2829	Chemokine_Receptors
ADM	133	Cytokines
ADM2	79924	Cytokines
AGRP	181	Cytokines
AGT	183	Cytokines
AMBN	258	Cytokines
AMELX	265	Cytokines
AMH	268	Cytokines
ANGPTL5	253935	Cytokines
ANGPTL7	10218	Cytokines
APLN	8862	Cytokines
AREG	374	Cytokines
MANF	7873	Cytokines
CDNF	441549	Cytokines
ARTN	9048	Cytokines
AVP	551	Cytokines
BDNF	627	Cytokines
BMP1	649	Cytokines
BMP10	27302	Cytokines
BMP15	9210	Cytokines
BMP2	650	Cytokines
BMP3	651	Cytokines
BMP4	652	Cytokines
BMP5	653	Cytokines
BMP6	654	Cytokines
BMP7	655	Cytokines
BMP8A	353500	Cytokines
BMP8B	656	Cytokines
BTC	685	Cytokines
MYDGF	56005	Cytokines
CALCA	796	Cytokines
CALCB	797	Cytokines
CAT	847	Cytokines
CCK	885	Cytokines
CD320	51293	Cytokines
CD70	970	Cytokines
ADA2	51816	Cytokines
CER1	9350	Cytokines
CGA	1081	Cytokines
CGB3	1082	Cytokines
CGB1	114335	Cytokines
CGB2	114336	Cytokines
CGB5	93659	Cytokines
CGB7	94027	Cytokines
CGB8	94115	Cytokines
CHGA	1113	Cytokines
CHGB	1114	Cytokines
CLCF1	23529	Cytokines
CLEC11A	6320	Cytokines
CMTM1	113540	Cytokines
CMTM2	146225	Cytokines
CMTM3	123920	Cytokines
CMTM4	146223	Cytokines
CMTM5	116173	Cytokines
CMTM6	54918	Cytokines
CMTM7	112616	Cytokines
CMTM8	152189	Cytokines
CNTF	1270	Cytokines
CORT	1325	Cytokines
CRH	1392	Cytokines
CSF1	1435	Cytokines
CSF2	1437	Cytokines
CSF3	1440	Cytokines
CSH1	1442	Cytokines
CSH2	1443	Cytokines
CSHL1	1444	Cytokines
CSPG5	10675	Cytokines
CTF1	1489	Cytokines
CCN2	1490	Cytokines
DKK1	22943	Cytokines
EBI3	10148	Cytokines
EGF	1950	Cytokines
EPGN	255324	Cytokines
EPO	2056	Cytokines
EREG	2069	Cytokines
ESM1	11082	Cytokines
FAM3B	54097	Cytokines
FAM3C	10447	Cytokines
FAM3D	131177	Cytokines
FGF1	2246	Cytokines
FGF11	2256	Cytokines
FGF12	2257	Cytokines
FGF13	2258	Cytokines
FGF14	2259	Cytokines
FGF16	8823	Cytokines
FGF17	8822	Cytokines
FGF18	8817	Cytokines
FGF19	9965	Cytokines
FGF20	26281	Cytokines
FGF21	26291	Cytokines
FGF22	27006	Cytokines
FGF23	8074	Cytokines
FGF3	2248	Cytokines
FGF4	2249	Cytokines
FGF5	2250	Cytokines
FGF6	2251	Cytokines
FGF7	2252	Cytokines
FGF8	2253	Cytokines
FGF9	2254	Cytokines
VEGFD	2277	Cytokines
FIGNL2	401720	Cytokines
FLT3LG	2323	Cytokines
FSHB	2488	Cytokines
GAL	51083	Cytokines
GALP	85569	Cytokines
GAST	2520	Cytokines
GCG	2641	Cytokines
GDF1	2657	Cytokines
GDF10	2662	Cytokines
GDF11	10220	Cytokines
GDF2	2658	Cytokines
GDF3	9573	Cytokines
GDF5	8200	Cytokines
GDF6	392255	Cytokines
GDF7	151449	Cytokines
GDF9	2661	Cytokines
GDNF	2668	Cytokines
GH1	2688	Cytokines
GH2	2689	Cytokines
GHRH	2691	Cytokines
GHRL	51738	Cytokines
GIP	2695	Cytokines
GKN1	56287	Cytokines
GMFB	2764	Cytokines
GMFG	9535	Cytokines
GNRH1	2796	Cytokines
GNRH2	2797	Cytokines
GPHA2	170589	Cytokines
GPHB5	122876	Cytokines
GPI	2821	Cytokines
GREM1	26585	Cytokines
GREM2	64388	Cytokines
GRP	2922	Cytokines
GUCA2A	2980	Cytokines
HBEGF	1839	Cytokines
HDGF	3068	Cytokines
HDGFL3	50810	Cytokines
IAPP	3375	Cytokines
IFNE	338376	Cytokines
IFNK	56832	Cytokines
IFNW1	3467	Cytokines
IGF1	3479	Cytokines
IGF2	3481	Cytokines
IL11	3589	Cytokines
IL12A	3592	Cytokines
IL16	3603	Cytokines
IL17B	27190	Cytokines
IL17C	27189	Cytokines
IL17D	53342	Cytokines
IL17F	112744	Cytokines
IL19	29949	Cytokines
IL1F10	84639	Cytokines
IL36RN	26525	Cytokines
IL36A	27179	Cytokines
IL37	27178	Cytokines
IL36B	27177	Cytokines
IL36G	56300	Cytokines
IL1RN	3557	Cytokines
IL20	50604	Cytokines
IL21	59067	Cytokines
IL23A	51561	Cytokines
IL24	11009	Cytokines
IL25	64806	Cytokines
IL26	55801	Cytokines
IFNL3	282617	Cytokines
IL3	3562	Cytokines
IL31	386653	Cytokines
IL32	9235	Cytokines
IL33	90865	Cytokines
IL34	146433	Cytokines
IL5	3567	Cytokines
IL6ST	3572	Cytokines
IL7	3574	Cytokines
IL9	3578	Cytokines
INHA	3623	Cytokines
INHBA	3624	Cytokines
INHBB	3625	Cytokines
INHBC	3626	Cytokines
INHBE	83729	Cytokines
INS	3630	Cytokines
INS-IGF2	723961	Cytokines
INSL3	3640	Cytokines
INSL4	3641	Cytokines
INSL5	10022	Cytokines
INSL6	11172	Cytokines
JAG1	182	Cytokines
JAG2	3714	Cytokines
FGF7P6	387628	Cytokines
FGF7P3	654466	Cytokines
KITLG	4254	Cytokines
KL	9365	Cytokines
LACRT	90070	Cytokines
LEFTY1	10637	Cytokines
LEFTY2	7044	Cytokines
LHB	3972	Cytokines
LIF	3976	Cytokines
LRSAM1	90678	Cytokines
LTB	4050	Cytokines
LTBP2	4053	Cytokines
LTBP3	4054	Cytokines
LTBP4	8425	Cytokines
MDK	4192	Cytokines
MIA	8190	Cytokines
MLN	4295	Cytokines
MSTN	2660	Cytokines
NAMPT	10135	Cytokines
NDP	4693	Cytokines
NENF	29937	Cytokines
NGF	4803	Cytokines
NMB	4828	Cytokines
NODAL	4838	Cytokines
CCN3	4856	Cytokines
NPFF	8620	Cytokines
NPPA	4878	Cytokines
NPPB	4879	Cytokines
NPPC	4880	Cytokines
NPY	4852	Cytokines
NRG1	3084	Cytokines
NRG2	9542	Cytokines
NRG3	10718	Cytokines
NRG4	145957	Cytokines
NRTN	4902	Cytokines
NTF3	4908	Cytokines
NTF4	4909	Cytokines
NTS	4922	Cytokines
NUDT6	11162	Cytokines
OGN	4969	Cytokines
OSGIN1	29948	Cytokines
OSM	5008	Cytokines
OSTN	344901	Cytokines
OXT	5020	Cytokines
ENDOU	8909	Cytokines
PDGFA	5154	Cytokines
PDGFB	5155	Cytokines
PDGFC	56034	Cytokines
PDGFD	80310	Cytokines
PDGFRL	5157	Cytokines
PGF	5228	Cytokines
PMCH	5367	Cytokines
PNOC	5368	Cytokines
POMC	5443	Cytokines
PPBPP2	10895	Cytokines
PPY	5539	Cytokines
PRL	5617	Cytokines
PRLH	51052	Cytokines
PROK1	84432	Cytokines
PSPN	5623	Cytokines
PTH	5741	Cytokines
PTH2	113091	Cytokines
PTHLH	5744	Cytokines
PTN	5764	Cytokines
PYY	5697	Cytokines
QRFP	347148	Cytokines
RABEP1	9135	Cytokines
RABEP2	79874	Cytokines
REG1A	5967	Cytokines
RETN	56729	Cytokines
RETNLB	84666	Cytokines
RLN1	6013	Cytokines
RLN2	6019	Cytokines
RLN3	117579	Cytokines
SCG2	7857	Cytokines
SCGB3A1	92304	Cytokines
SCT	6343	Cytokines
AIMP1	9255	Cytokines
SECTM1	6398	Cytokines
SLURP1	57152	Cytokines
SPP1	6696	Cytokines
SST	6750	Cytokines
STC1	6781	Cytokines
STC2	8614	Cytokines
TAC1	6863	Cytokines
TDGF1	6997	Cytokines
TDGF1P3	6998	Cytokines
TG	7038	Cytokines
TGFA	7039	Cytokines
TGFB2	7042	Cytokines
TGFB3	7043	Cytokines
THPO	7066	Cytokines
TNFRSF11B	4982	Cytokines
TNFSF12	8742	Cytokines
TNFSF13	8741	Cytokines
TNFSF13B	10673	Cytokines
TNFSF14	8740	Cytokines
TNFSF15	9966	Cytokines
TNFSF18	8995	Cytokines
TNFSF8	944	Cytokines
TNFSF9	8744	Cytokines
TOR2A	27433	Cytokines
TRH	7200	Cytokines
TSHB	7252	Cytokines
TSLP	85480	Cytokines
TXLNA	200081	Cytokines
UCN	7349	Cytokines
UCN2	90226	Cytokines
UCN3	114131	Cytokines
UTS2	10911	Cytokines
UTS2B	257313	Cytokines
VEGFB	7423	Cytokines
VEGFC	7424	Cytokines
VGF	7425	Cytokines
VIP	7432	Cytokines
ACVR1B	91	Cytokine_Receptors
ACVR1C	130399	Cytokine_Receptors
ACVR2A	92	Cytokine_Receptors
ACVR2B	93	Cytokine_Receptors
ACVRL1	94	Cytokine_Receptors
ADCYAP1R1	117	Cytokine_Receptors
ADIPOR1	51094	Cytokine_Receptors
ADIPOR2	79602	Cytokine_Receptors
ADRB1	153	Cytokine_Receptors
ADRB2	154	Cytokine_Receptors
AGTR1	185	Cytokine_Receptors
AGTR2	186	Cytokine_Receptors
AMHR2	269	Cytokine_Receptors
ANGPT1	284	Cytokine_Receptors
ANGPT4	51378	Cytokine_Receptors
ANGPTL1	9068	Cytokine_Receptors
ANGPTL2	23452	Cytokine_Receptors
ANGPTL3	27329	Cytokine_Receptors
ANGPTL4	51129	Cytokine_Receptors
ANGPTL6	83854	Cytokine_Receptors
APLNR	187	Cytokine_Receptors
AR	367	Cytokine_Receptors
AVPR1A	552	Cytokine_Receptors
AVPR1B	553	Cytokine_Receptors
AVPR2	554	Cytokine_Receptors
BMPR1A	657	Cytokine_Receptors
BMPR1B	658	Cytokine_Receptors
BMPR2	659	Cytokine_Receptors
BRD8	10902	Cytokine_Receptors
C3AR1	719	Cytokine_Receptors
CALCR	799	Cytokine_Receptors
CALCRL	10203	Cytokine_Receptors
CNTFR	1271	Cytokine_Receptors
CRHR1	1394	Cytokine_Receptors
CRHR2	1395	Cytokine_Receptors
CRIM1	51232	Cytokine_Receptors
CRLF1	9244	Cytokine_Receptors
CRLF2	64109	Cytokine_Receptors
CRLF3	51379	Cytokine_Receptors
CSF1R	1436	Cytokine_Receptors
CSF2RA	1438	Cytokine_Receptors
CSF2RB	1439	Cytokine_Receptors
CSF3R	1441	Cytokine_Receptors
EGFR	1956	Cytokine_Receptors
ENG	2022	Cytokine_Receptors
EPOR	2057	Cytokine_Receptors
ESR1	2099	Cytokine_Receptors
ESR2	2100	Cytokine_Receptors
ESRRA	2101	Cytokine_Receptors
ESRRB	2103	Cytokine_Receptors
ESRRG	2104	Cytokine_Receptors
FGFR1	2260	Cytokine_Receptors
FGFR2	2263	Cytokine_Receptors
FGFR3	2261	Cytokine_Receptors
FGFR4	2264	Cytokine_Receptors
FGFRL1	53834	Cytokine_Receptors
FLT1	2321	Cytokine_Receptors
FLT3	2322	Cytokine_Receptors
FLT4	2324	Cytokine_Receptors
FSHR	2492	Cytokine_Receptors
GALR2	8811	Cytokine_Receptors
GALR3	8484	Cytokine_Receptors
GCGR	2642	Cytokine_Receptors
GHR	2690	Cytokine_Receptors
GHRHR	2692	Cytokine_Receptors
GHSR	2693	Cytokine_Receptors
GIPR	2696	Cytokine_Receptors
GLP1R	2740	Cytokine_Receptors
GLP2R	9340	Cytokine_Receptors
GNRHR	2798	Cytokine_Receptors
GPER1	2852	Cytokine_Receptors
HNF4A	3172	Cytokine_Receptors
HNF4G	3174	Cytokine_Receptors
HTR3A	3359	Cytokine_Receptors
HTR3B	9177	Cytokine_Receptors
HTR3C	170572	Cytokine_Receptors
HTR3D	200909	Cytokine_Receptors
HTR3E	285242	Cytokine_Receptors
IFNGR2	3460	Cytokine_Receptors
IGF1R	3480	Cytokine_Receptors
IGF2R	3482	Cytokine_Receptors
IL10RA	3587	Cytokine_Receptors
IL10RB	3588	Cytokine_Receptors
IL11RA	3590	Cytokine_Receptors
IL12RB1	3594	Cytokine_Receptors
IL12RB2	3595	Cytokine_Receptors
IL13RA1	3597	Cytokine_Receptors
IL13RA2	3598	Cytokine_Receptors
IL15RA	3601	Cytokine_Receptors
IL2RB	3560	Cytokine_Receptors
IL17RA	23765	Cytokine_Receptors
IL17RB	55540	Cytokine_Receptors
IL17RC	84818	Cytokine_Receptors
IL17RD	54756	Cytokine_Receptors
IL17RE	132014	Cytokine_Receptors
IL18R1	8809	Cytokine_Receptors
IL18RAP	8807	Cytokine_Receptors
IL1R1	3554	Cytokine_Receptors
IL1R2	7850	Cytokine_Receptors
IL1RAP	3556	Cytokine_Receptors
IL1RL1	9173	Cytokine_Receptors
IL1RL2	8808	Cytokine_Receptors
IL20RA	53832	Cytokine_Receptors
IL20RB	53833	Cytokine_Receptors
IL21R	50615	Cytokine_Receptors
IL22RA1	58985	Cytokine_Receptors
IL22RA2	116379	Cytokine_Receptors
IL23R	149233	Cytokine_Receptors
IL27RA	9466	Cytokine_Receptors
IL2RA	3559	Cytokine_Receptors
IL2RG	3561	Cytokine_Receptors
IL31RA	133396	Cytokine_Receptors
IL3RA	3563	Cytokine_Receptors
IL4R	3566	Cytokine_Receptors
IL5RA	3568	Cytokine_Receptors
IL6R	3570	Cytokine_Receptors
IL9R	3581	Cytokine_Receptors
INSR	3643	Cytokine_Receptors
KDR	3791	Cytokine_Receptors
LEPR	3953	Cytokine_Receptors
LGR4	55366	Cytokine_Receptors
LGR5	8549	Cytokine_Receptors
LGR6	59352	Cytokine_Receptors
LHCGR	3973	Cytokine_Receptors
LIFR	3977	Cytokine_Receptors
LTBR	4055	Cytokine_Receptors
MC1R	4157	Cytokine_Receptors
MC2R	4158	Cytokine_Receptors
MC3R	4159	Cytokine_Receptors
MC4R	4160	Cytokine_Receptors
MCHR1	2847	Cytokine_Receptors
MCHR2	84539	Cytokine_Receptors
MET	4233	Cytokine_Receptors
MLNR	2862	Cytokine_Receptors
MPL	4352	Cytokine_Receptors
MTNR1A	4543	Cytokine_Receptors
MTNR1B	4544	Cytokine_Receptors
NGFR	4804	Cytokine_Receptors
NMBR	4829	Cytokine_Receptors
NPR1	4881	Cytokine_Receptors
NPR3	4883	Cytokine_Receptors
NR0B1	190	Cytokine_Receptors
NR0B2	8431	Cytokine_Receptors
NR1D1	9572	Cytokine_Receptors
NR1D2	9975	Cytokine_Receptors
NR1H2	7376	Cytokine_Receptors
NR1H3	10062	Cytokine_Receptors
NR1H4	9971	Cytokine_Receptors
NR1I2	8856	Cytokine_Receptors
NR1I3	9970	Cytokine_Receptors
NR2C1	7181	Cytokine_Receptors
NR2C2	7182	Cytokine_Receptors
NR2E1	7101	Cytokine_Receptors
NR2E3	10002	Cytokine_Receptors
NR2F1	7025	Cytokine_Receptors
NR2F2	7026	Cytokine_Receptors
NR2F6	2063	Cytokine_Receptors
NR3C1	2908	Cytokine_Receptors
NR3C2	4306	Cytokine_Receptors
NR4A1	3164	Cytokine_Receptors
NR4A2	4929	Cytokine_Receptors
NR4A3	8013	Cytokine_Receptors
NR5A1	2516	Cytokine_Receptors
NR5A2	2494	Cytokine_Receptors
NR6A1	2649	Cytokine_Receptors
NRP1	8829	Cytokine_Receptors
NRP2	8828	Cytokine_Receptors
OGFR	11054	Cytokine_Receptors
OPRD1	4985	Cytokine_Receptors
OPRK1	4986	Cytokine_Receptors
OPRL1	4987	Cytokine_Receptors
OPRM1	4988	Cytokine_Receptors
OSMR	9180	Cytokine_Receptors
OXTR	5021	Cytokine_Receptors
PGR	5241	Cytokine_Receptors
PGRMC2	10424	Cytokine_Receptors
PPARA	5465	Cytokine_Receptors
PPARD	5467	Cytokine_Receptors
PRLHR	2834	Cytokine_Receptors
PRLR	5618	Cytokine_Receptors
PTGER1	5731	Cytokine_Receptors
PTGER2	5732	Cytokine_Receptors
PTGER3	5733	Cytokine_Receptors
PTGER4	5734	Cytokine_Receptors
PTGFR	5737	Cytokine_Receptors
PTH1R	5745	Cytokine_Receptors
PTH2R	5746	Cytokine_Receptors
RARA	5914	Cytokine_Receptors
RARB	5915	Cytokine_Receptors
RARG	5916	Cytokine_Receptors
RORA	6095	Cytokine_Receptors
RORB	6096	Cytokine_Receptors
RORC	6097	Cytokine_Receptors
RXFP1	59350	Cytokine_Receptors
RXFP2	122042	Cytokine_Receptors
RXRA	6256	Cytokine_Receptors
RXRB	6257	Cytokine_Receptors
RXRG	6258	Cytokine_Receptors
S1PR1	1901	Cytokine_Receptors
S1PR2	9294	Cytokine_Receptors
SCTR	6344	Cytokine_Receptors
SDC1	6382	Cytokine_Receptors
SDC2	6383	Cytokine_Receptors
SDC3	9672	Cytokine_Receptors
SDC4	6385	Cytokine_Receptors
SORT1	6272	Cytokine_Receptors
SSTR1	6751	Cytokine_Receptors
SSTR2	6752	Cytokine_Receptors
SSTR5	6755	Cytokine_Receptors
ST2	6761	Cytokine_Receptors
TACR1	6869	Cytokine_Receptors
TEK	7010	Cytokine_Receptors
TGFBR1	7046	Cytokine_Receptors
TGFBR2	7048	Cytokine_Receptors
TGFBR3	7049	Cytokine_Receptors
THRA	7067	Cytokine_Receptors
THRB	7068	Cytokine_Receptors
TIE1	7075	Cytokine_Receptors
TNFRSF10C	8794	Cytokine_Receptors
TNFRSF10D	8793	Cytokine_Receptors
TNFRSF11A	8792	Cytokine_Receptors
TNFRSF12A	51330	Cytokine_Receptors
TNFRSF13B	23495	Cytokine_Receptors
TNFRSF13C	115650	Cytokine_Receptors
TNFRSF14	8764	Cytokine_Receptors
TNFRSF17	608	Cytokine_Receptors
TNFRSF18	8784	Cytokine_Receptors
TNFRSF19	55504	Cytokine_Receptors
TNFRSF1A	7132	Cytokine_Receptors
TNFRSF1B	7133	Cytokine_Receptors
TNFRSF21	27242	Cytokine_Receptors
TNFRSF25	8718	Cytokine_Receptors
TNFRSF4	7293	Cytokine_Receptors
TNFRSF6B	8771	Cytokine_Receptors
TNFRSF8	943	Cytokine_Receptors
TNFRSF9	3604	Cytokine_Receptors
TRHR	7201	Cytokine_Receptors
TSHR	7253	Cytokine_Receptors
TUBB3	10381	Cytokine_Receptors
VIPR1	7433	Cytokine_Receptors
VIPR2	7434	Cytokine_Receptors
PTPN11	5781	NaturalKiller_Cell_Cytotoxicity
ICAM2	3384	NaturalKiller_Cell_Cytotoxicity
ITGAL	3683	NaturalKiller_Cell_Cytotoxicity
ITGB2	3689	NaturalKiller_Cell_Cytotoxicity
PAK1	5058	NaturalKiller_Cell_Cytotoxicity
NCR2	9436	NaturalKiller_Cell_Cytotoxicity
TYROBP	7305	NaturalKiller_Cell_Cytotoxicity
LCK	3932	NaturalKiller_Cell_Cytotoxicity
FCGR3A	2214	NaturalKiller_Cell_Cytotoxicity
FCGR3B	2215	NaturalKiller_Cell_Cytotoxicity
NCR1	9437	NaturalKiller_Cell_Cytotoxicity
NCR3	259197	NaturalKiller_Cell_Cytotoxicity
CD247	919	NaturalKiller_Cell_Cytotoxicity
ZAP70	7535	NaturalKiller_Cell_Cytotoxicity
LCP2	3937	NaturalKiller_Cell_Cytotoxicity
LAT	27040	NaturalKiller_Cell_Cytotoxicity
PLCG1	5335	NaturalKiller_Cell_Cytotoxicity
SH3BP2	6452	NaturalKiller_Cell_Cytotoxicity
FYN	2534	NaturalKiller_Cell_Cytotoxicity
SHC2	25759	NaturalKiller_Cell_Cytotoxicity
SHC4	399694	NaturalKiller_Cell_Cytotoxicity
SHC3	53358	NaturalKiller_Cell_Cytotoxicity
SHC1	6464	NaturalKiller_Cell_Cytotoxicity
GRB2	2885	NaturalKiller_Cell_Cytotoxicity
SOS1	6654	NaturalKiller_Cell_Cytotoxicity
SOS2	6655	NaturalKiller_Cell_Cytotoxicity
ARAF	369	NaturalKiller_Cell_Cytotoxicity
BRAF	673	NaturalKiller_Cell_Cytotoxicity
RAF1	5894	NaturalKiller_Cell_Cytotoxicity
HCST	10870	NaturalKiller_Cell_Cytotoxicity
CD48	962	NaturalKiller_Cell_Cytotoxicity
CD244	51744	NaturalKiller_Cell_Cytotoxicity
PRKCA	5578	NaturalKiller_Cell_Cytotoxicity
PRKCG	5582	NaturalKiller_Cell_Cytotoxicity
SH2D1B	117157	NaturalKiller_Cell_Cytotoxicity
SH2D1A	4068	NaturalKiller_Cell_Cytotoxicity
FAS	355	NaturalKiller_Cell_Cytotoxicity
GZMB	3002	NaturalKiller_Cell_Cytotoxicity
PRF1	5551	NaturalKiller_Cell_Cytotoxicity
CASP3	836	NaturalKiller_Cell_Cytotoxicity
BID	637	NaturalKiller_Cell_Cytotoxicity
CD3D	915	TCRsignalingPathway
CD3E	916	TCRsignalingPathway
CD3G	917	TCRsignalingPathway
PTPRC	5788	TCRsignalingPathway
ITK	3702	TCRsignalingPathway
TEC	7006	TCRsignalingPathway
NCK1	4690	TCRsignalingPathway
NCK2	8440	TCRsignalingPathway
GRAP2	9402	TCRsignalingPathway
PAK2	5062	TCRsignalingPathway
PAK3	5063	TCRsignalingPathway
PAK4	10298	TCRsignalingPathway
PAK6	56924	TCRsignalingPathway
PAK5	57144	TCRsignalingPathway
RHOA	387	TCRsignalingPathway
CDC42	998	TCRsignalingPathway
CD28	940	TCRsignalingPathway
ICOS	29851	TCRsignalingPathway
MAP3K8	1326	TCRsignalingPathway
MAP3K14	9020	TCRsignalingPathway
CTLA4	1493	TCRsignalingPathway
CBLC	23624	TCRsignalingPathway
CBL	867	TCRsignalingPathway
CBLB	868	TCRsignalingPathway
CDK4	1019	TCRsignalingPathway
RASGRP1	10125	TCRsignalingPathway
PDK1	5163	TCRsignalingPathway
PRKCQ	5588	TCRsignalingPathway
TRAC	28755	TCRsignalingPathway
TRAJ1	28754	TCRsignalingPathway
TRAJ2	28753	TCRsignalingPathway
TRAJ3	28752	TCRsignalingPathway
TRAJ4	28751	TCRsignalingPathway
TRAJ5	28750	TCRsignalingPathway
TRAJ6	28749	TCRsignalingPathway
TRAJ7	28748	TCRsignalingPathway
TRAJ8	28747	TCRsignalingPathway
TRAJ9	28746	TCRsignalingPathway
TRAJ10	28745	TCRsignalingPathway
TRAJ11	28744	TCRsignalingPathway
TRAJ12	28743	TCRsignalingPathway
TRAJ13	28742	TCRsignalingPathway
TRAJ14	28741	TCRsignalingPathway
TRAJ15	28740	TCRsignalingPathway
TRAJ16	28739	TCRsignalingPathway
TRAJ17	28738	TCRsignalingPathway
TRAJ18	28737	TCRsignalingPathway
TRAJ19	28736	TCRsignalingPathway
TRAJ20	28735	TCRsignalingPathway
TRAJ21	28734	TCRsignalingPathway
TRAJ22	28733	TCRsignalingPathway
TRAJ23	28732	TCRsignalingPathway
TRAJ24	28731	TCRsignalingPathway
TRAJ25	28730	TCRsignalingPathway
TRAJ26	28729	TCRsignalingPathway
TRAJ27	28728	TCRsignalingPathway
TRAJ28	28727	TCRsignalingPathway
TRAJ29	28726	TCRsignalingPathway
TRAJ30	28725	TCRsignalingPathway
TRAJ31	28724	TCRsignalingPathway
TRAJ32	28723	TCRsignalingPathway
TRAJ33	28722	TCRsignalingPathway
TRAJ34	28721	TCRsignalingPathway
TRAJ35	28720	TCRsignalingPathway
TRAJ36	28719	TCRsignalingPathway
TRAJ37	28718	TCRsignalingPathway
TRAJ38	28717	TCRsignalingPathway
TRAJ39	28716	TCRsignalingPathway
TRAJ40	28715	TCRsignalingPathway
TRAJ41	28714	TCRsignalingPathway
TRAJ42	28713	TCRsignalingPathway
TRAJ43	28712	TCRsignalingPathway
TRAJ44	28711	TCRsignalingPathway
TRAJ45	28710	TCRsignalingPathway
TRAJ46	28709	TCRsignalingPathway
TRAJ47	28708	TCRsignalingPathway
TRAJ48	28707	TCRsignalingPathway
TRAJ49	28706	TCRsignalingPathway
TRAJ50	28705	TCRsignalingPathway
TRAJ52	28703	TCRsignalingPathway
TRAJ53	28702	TCRsignalingPathway
TRAJ54	28701	TCRsignalingPathway
TRAJ56	28699	TCRsignalingPathway
TRAJ57	28698	TCRsignalingPathway
TRAJ58	28697	TCRsignalingPathway
TRAJ59	28696	TCRsignalingPathway
TRAJ61	28694	TCRsignalingPathway
TRAV1-1	28693	TCRsignalingPathway
TRAV1-2	28692	TCRsignalingPathway
TRAV2	28691	TCRsignalingPathway
TRAV3	28690	TCRsignalingPathway
TRAV4	28689	TCRsignalingPathway
TRAV5	28688	TCRsignalingPathway
TRAV7	28686	TCRsignalingPathway
TRAV8-1	28685	TCRsignalingPathway
TRAV8-2	28684	TCRsignalingPathway
TRAV8-3	28683	TCRsignalingPathway
TRAV8-4	28682	TCRsignalingPathway
TRAV8-6	28680	TCRsignalingPathway
TRAV8-7	28679	TCRsignalingPathway
TRAV9-1	28678	TCRsignalingPathway
TRAV9-2	28677	TCRsignalingPathway
TRAV10	28676	TCRsignalingPathway
TRAV12-1	28674	TCRsignalingPathway
TRAV12-2	28673	TCRsignalingPathway
TRAV12-3	28672	TCRsignalingPathway
TRAV13-1	28671	TCRsignalingPathway
TRAV13-2	28670	TCRsignalingPathway
TRAV14DV4	28669	TCRsignalingPathway
TRAV16	28667	TCRsignalingPathway
TRAV17	28666	TCRsignalingPathway
TRAV18	28665	TCRsignalingPathway
TRAV19	28664	TCRsignalingPathway
TRAV20	28663	TCRsignalingPathway
TRAV21	28662	TCRsignalingPathway
TRAV22	28661	TCRsignalingPathway
TRAV23DV6	28660	TCRsignalingPathway
TRAV24	28659	TCRsignalingPathway
TRAV25	28658	TCRsignalingPathway
TRAV26-1	28657	TCRsignalingPathway
TRAV26-2	28656	TCRsignalingPathway
TRAV27	28655	TCRsignalingPathway
TRAV29DV5	28653	TCRsignalingPathway
TRAV30	28652	TCRsignalingPathway
TRAV34	28648	TCRsignalingPathway
TRAV35	28647	TCRsignalingPathway
TRAV36DV7	28646	TCRsignalingPathway
TRAV38-1	28644	TCRsignalingPathway
TRAV38-2DV8	28643	TCRsignalingPathway
TRAV39	28642	TCRsignalingPathway
TRAV40	28641	TCRsignalingPathway
TRAV41	28640	TCRsignalingPathway
TRBC1	28639	TCRsignalingPathway
TRBC2	28638	TCRsignalingPathway
TRBD1	28637	TCRsignalingPathway
TRBD2	28636	TCRsignalingPathway
TRBJ1-1	28635	TCRsignalingPathway
TRBJ1-2	28634	TCRsignalingPathway
TRBJ1-3	28633	TCRsignalingPathway
TRBJ1-4	28632	TCRsignalingPathway
TRBJ1-5	28631	TCRsignalingPathway
TRBJ1-6	28630	TCRsignalingPathway
TRBJ2-1	28629	TCRsignalingPathway
TRBJ2-2	28628	TCRsignalingPathway
TRBJ2-3	28626	TCRsignalingPathway
TRBJ2-4	28625	TCRsignalingPathway
TRBJ2-5	28624	TCRsignalingPathway
TRBJ2-6	28623	TCRsignalingPathway
TRBJ2-7	28622	TCRsignalingPathway
TRBV2	28620	TCRsignalingPathway
TRBV3-1	28619	TCRsignalingPathway
TRBV4-1	28617	TCRsignalingPathway
TRBV4-2	28616	TCRsignalingPathway
TRBV4-3	28615	TCRsignalingPathway
TRBV5-1	28614	TCRsignalingPathway
TRBV5-4	28611	TCRsignalingPathway
TRBV5-5	28610	TCRsignalingPathway
TRBV5-6	28609	TCRsignalingPathway
TRBV5-7	28608	TCRsignalingPathway
TRBV5-8	28607	TCRsignalingPathway
TRBV6-1	28606	TCRsignalingPathway
TRBV6-2	28605	TCRsignalingPathway
TRBV6-3	28604	TCRsignalingPathway
TRBV6-4	28603	TCRsignalingPathway
TRBV6-5	28602	TCRsignalingPathway
TRBV6-6	28601	TCRsignalingPathway
TRBV6-7	28600	TCRsignalingPathway
TRBV6-8	28599	TCRsignalingPathway
TRBV6-9	28598	TCRsignalingPathway
TRBV7-2	28596	TCRsignalingPathway
TRBV7-3	28595	TCRsignalingPathway
TRBV7-4	28594	TCRsignalingPathway
TRBV7-6	28592	TCRsignalingPathway
TRBV7-7	28591	TCRsignalingPathway
TRBV7-8	28590	TCRsignalingPathway
TRBV7-9	28589	TCRsignalingPathway
TRBV9	28586	TCRsignalingPathway
TRBV10-1	28585	TCRsignalingPathway
TRBV10-2	28584	TCRsignalingPathway
TRBV10-3	28583	TCRsignalingPathway
TRBV11-1	28582	TCRsignalingPathway
TRBV11-2	28581	TCRsignalingPathway
TRBV11-3	28580	TCRsignalingPathway
TRBV12-3	28577	TCRsignalingPathway
TRBV12-4	28576	TCRsignalingPathway
TRBV12-5	28575	TCRsignalingPathway
TRBV13	28574	TCRsignalingPathway
TRBV14	28573	TCRsignalingPathway
TRBV15	28572	TCRsignalingPathway
TRBV16	28571	TCRsignalingPathway
TRBV17	28570	TCRsignalingPathway
TRBV18	28569	TCRsignalingPathway
TRBV19	28568	TCRsignalingPathway
TRBV20-1	28567	TCRsignalingPathway
TRBV24-1	28563	TCRsignalingPathway
TRBV25-1	28562	TCRsignalingPathway
TRBV27	28560	TCRsignalingPathway
TRBV28	28559	TCRsignalingPathway
TRBV29-1	28558	TCRsignalingPathway
TRBV30	28557	TCRsignalingPathway
TRDC	28526	TCRsignalingPathway
TRDD1	28525	TCRsignalingPathway
TRDD2	28524	TCRsignalingPathway
TRDD3	28523	TCRsignalingPathway
TRDJ1	28522	TCRsignalingPathway
TRDJ2	28521	TCRsignalingPathway
TRDJ3	28520	TCRsignalingPathway
TRDJ4	28519	TCRsignalingPathway
TRDV1	28518	TCRsignalingPathway
TRDV2	28517	TCRsignalingPathway
TRDV3	28516	TCRsignalingPathway
TRGV9	6983	TCRsignalingPathway
TRGV8	6982	TCRsignalingPathway
TRGV5	6978	TCRsignalingPathway
TRGV4	6977	TCRsignalingPathway
TRGV3	6976	TCRsignalingPathway
TRGV2	6974	TCRsignalingPathway
TRGJP2	6972	TCRsignalingPathway
TRGJP1	6971	TCRsignalingPathway
TRGJP	6970	TCRsignalingPathway
TRGJ2	6969	TCRsignalingPathway
TRGJ1	6968	TCRsignalingPathway
TRGC2	6967	TCRsignalingPathway
TRGC1	6966	TCRsignalingPathway
TRAV6	6956	TCRsignalingPathway

## Sheet: Supplementary Table 7
Supplementary Table 7. Representative feature genes of 31 distinct immune infiltration cells.
Immune cell subtype	Gene
Activated B cells	AKNA	ARHGAP25	CCL21	CD180	CD2	CD27	CD37	CD38	CLEC17A	CLEC9A	CLECL1	FAIM3	FAM65B	GIMAP4	MAP4K1	PAX5	TNFRSF17	TRAF3IP3
Activated CD4	ANLN	BRIP1	BUB1B	CASC5	CCNB1	CCNB2	CCNE2	CEP55	CKAP2L	DLGAP5	DTL	E2F8	ECT2	ESCO2	EXO1	EXOC6	FBXO5	FIGNL1	HELLS	HMMR	IARS	KIF11	KIF18A	KIF20A	KNTC1	MAD2L1	MASTL	MTHFD2	NCAPG2	NCAPH	NEIL3	NUF2	PRC1	PSAT1	RTKN2
Activated CD8	ADRM1	AHSA1	C1GALT1C1	CCT5	CCT6B	CETN3	CSE1L	EIF2S1	GAL	GEMIN6	GPT2	KIAA0101	MND1	MPZL1	MRPS16	PCNA	PTRH2	RFC5	SPC25	TIMM13	TIMM8B	TK1	TUBB	TXNDC17
Central memory CD4	ADAM19	AHNAK	AIM2	COL4A1	CYLD	DPEP2	EPHA4	FYN	IL6R	IPCEF1	KLF10	MAL	MALT1	NXN	OPTN	PLCL2	PNRC1	SMAD4	SPOCK2	TRIB2	TXK
Central memory CD8	ADAM23	ATP2B4	BCL2L11	CD300A	CD80	CHN1	F2R	F8	GABARAPL1	GPR183	KLRK1	MSC	PYHIN1	RCAN2	RGS1	SLAMF1	SLFN11	ZEB2
Cytotoxic cells	BST2	BTN3A2	IL10RA	KLRB1	LAT2	LILRA2	SELL	SLAMF6	SLAMF7
DC	C1QC	CCDC88A	CCL13	CCL3L1	CCL3L3	CD300E	CD86	CLEC1A	CLEC4C	CLEC5A	CLIC2	CSF2RA	FAM49A	FCGR1A	FN1	FSTL1	GPR109B	GPX3	HLA-DQA2	INHBA	LGMN	NGFR	PDGFRL	PDPN	PRKAR2B	SIGLEC1	SIGLEC5	SLAMF9	STAB1	THBD	TNFAIP2	TTYH2	UBD	VCAM1
Effector memory CD4	BMI1	CASP3	CNOT10	COPB2	DARS	EXOSC9	EZH2	GDE1	IFT74	KLF5	NDUFB9	NUP205	SHCBP1	XRCC6
Effector memory CD8	APOBEC3H	ARHGAP10	ATP10D	BIRC3	C3AR1	CCL4	CD244	CD55	CFLAR	CMKLR1	DAPP1	DFNB31	DRAM1	EFNA5	FCGR2C	FCGR3A	FCRL6	FGR	GPR114	GZMH	HAPLN3	HLA-DMB	HLA-DPA1	HLA-DPB1	IFI16	IKZF2	IL15	IL2RB	JAKMIP1	KLRD1	LY96	NFKBIA	PLXNC1	PPP4R1	PTPN22	RGS18	SETD7	SH2D1B	SLA2	STXBP1	TLR5	TYROBP
Eosinophil	CCL24	CFD	CREB3	EGR1	EPX	FBXO16	HFE	HIVEP1	HIVEP2	MBP	PRNP	RNASE2	RNASE3	S100A4	SIGLEC8
iDC	ATP6V1A	C1QB	CHST11	CSF1	DPYD	FNDC3B	GRP	IL1RN	INPP5F	LPL	LPXN	MMD	PLAU	PLCB2	RAB38	RDX	RRAGD	TACSTD2	TGM2	TIMD4	TM7SF4
Immature B cells	BANK1	CD22	CYBB	ETS1	FAM129C	FCRL1	FCRL2	FCRL3	FCRL5	FCRLA	HDAC9	HLA-DOB	HLA-DQA1	HVCN1	KIAA0226	NCF1	NCF1B	P2RY10	PNOC	SP100	STAP1	TAGAP	TXNIP	ZCCHC2
Macrophages	AIF1	CCL1	CCL14	CCL26	CD163	CD300LB	CNR1	CNR2	CPM	CSF3R	ENG	FCAR	IGF1	IL34	L1CAM	LILRA1	LILRA5	LRP1	MS4A7	MS4A8B	TREM1	TREML1
Mast cells	ACSL4	ADAMTS3	ADCYAP1	ARHGAP15	ATP8B4	C19orf59	CASQ1	CLC	CMA1	CPA3	CTSG	DUSP14	EGR3	EMR1	FST	HDC	HEY1	KRT1	LXN	MEIS2	MS4A2	MS4A3	NLRP3	NTRK1	PLAT	PTGS1	PTGS2	RGS16	SCG2	SDPR	SERPINB2	SIGLEC14	SIGLEC6	SLC18A2	SLC24A3	TAL1	TARP	TIE1	TIMP1	TNFAIP6	TSPAN4	VAT1
mDC	ATP5O	CBX1	DNAJC15	ENSA	FOXN3	PRCP	SSB	TPMT
Memory B cells	AICDA	CCNA2	CDKN3	CLCN5	ENPP1	FCER1A	FCRL4	MYC	RUNX2	SORL1	SOX5	STAT5A	STAT5B	TLR9
Monocytes	ACTR3	ANXA5	ARPC2	ATP6V1B2	BASP1	CD300LF	DAZAP2	EIF4A1	EIF4G2	EMP3	FCN1	FTL	GABARAP	HIF1A	LITAF	NCOA4	OLR1	RAB1A	RHOA	SAT1	SDCBP	SRGN	TEK	TMBIM6	UBE2D3
Neutrophils	ABTB1	AMPD2	CAMP	EMR4P	FPR1	FPR2	GPR77	MAEA	PROK2	SEC14L1	SEPX1	SLC25A37	TNFSF14	TREML4	VNN2	XPO6
NK	AKT3	AXL	CDH2	CRTAM	CYTH1	FASLG	GRB2	KLRG1	LILRB5	LST1	MAPK4	NOTCH3	PIK3CG	PILRA	PLCG2	SIGLEC7	SIGLEC9
NK56 bright	C11orf75	DYNLL1	HCP5	HDGFRP2	KRT86	MLST8	MYL6B	TAX1BP3
NK56 dim	AKR7A3	CLTB	FAM27A	GLS2	GPRC5C	GRIN1	HLA-E	KIR2DS4	KLHL21	KRT80	MPL	PHRF1	PORCN	PQBP1	PSMC4	TEX264	UPP1
NKT	BTN2A2	CD101	GNLY	KIR2DL1	KIR2DL3	KIR3DL1	KIR3DL2	KLRC1	MICB	NCR1	NFATC2IP	TNFRSF11A
pDC	CBX6	DAB2	DDX17	HIGD1A	IDH3A	IL3RA	MAGED1	NUCB2	OFD1	OGT	PDIA4	SERTAD2	SIRPA	SPCS3	TMED2	TMX1	UGCG	ZDHHC17
T cells	BATF	BTLA	CCL11	CCL17	CCL22	CCL3	CCL5	CCL7	CCR1	CCR3	CCR4	CCR8	CD1A	CD1B	CD1C	CD1D	CD1E	CD247	CD28	CD3D	CD3E	CD3G	CD69	CD8A	CXCR1	CXCR4	CXCR5	CXCR6	FGFBP2	FLT3	FOSL1	GRAP2	HLA-DRA	HLA-DRB1	HLA-DRB5	HRH2	IFNG	IL10	IL12B	IL12RB1	IL12RB2	IL18R1	IL18RAP	IL1B	IL21	IL21R	IL24	IL26	IL27
TFH	B3GAT1	BCL6	CCR7	CD200	CD83	CD84	CDK5R1	FGF2	GPR18	PDCD1
TGD	ACP5	C1orf54	CARD8	CCL18	CD209	CD33	CECR1	CLEC10A	CLEC4A	CSF1R	FCER1G	FCGR2A	FCGR2B	FCGR3B	FGF7	FGL2	FPR3	GM2A	GPNMB	HCK	HK3	LIPA	MARCO	MMP12	MNDA	MRC1	MS4A6A	NPL	PLA2G7	PLEK	RAB23	RNASE6	SDC2	SLAMF8	SLC15A3	SLC38A6	SLC7A7	SPP1	TFEC	TM6SF1	TNFSF8	TREM2	TRPV2
Th1	ADAM8	CCR5	CD151	CD48	CD52	CD53	CD6	CD68	CD7	CD96	CD97	EBI3	GPR84	HAVCR2	ICAM1	ICAM3	IGSF6	IL12A	IL7R	IRF1	ITGA4	ITGAM	ITGAX	ITGB2	ITGB4	ITGB7	LTA	LTB	METRNL	P2RX5	PTPRC	SPN	TBX21	TLR6	TNFRSF1A	TNFRSF9	TRAT1
Th17	ABP1	B4GALNT4	C2CD4A	C2CD4B	CA2	CCDC65	CEACAM3	CHRM3	DOC2B	F12	FURIN	GPR25	IL17A	IL17C	IL17F	IL17RC	IL17RE	IL23A	ILDR1	LONRF3	LTK	MOCOS	SH2D6	TNIP2	TRAF3IP2	YBX2
Th2	ASB2	CALD1	CCR2	CSRP2	DAPK1	DLC1	DNAJC12	DUSP6	GATA3	GNAI1	HTR2B	LAMP3	NRP2	OSBPL1A	PDE4B	PHLDA1	PLA2G4A	RAB27B	RBMS3	RNF125	SIGLEC10	SKAP1	SMAD2	TMPRSS3	UBASH3A
Treg	CCL19	CD34	CD72	CTLA4	FOXP3	GADD45B	GEM	IL1RL1	IL9R	MADCAM1	MYH10	NCF2	RCSD1	RYR1	SELE	SELP	SFRP1	SIT1	TIGIT	TLR10	TLR2	TLR7	TLR8	TRAF1	WIPF1	TGFB1
MDSC	ADORA3	AG2	ARG1	BIN2	C1orf162	CAPS	CD117	CD11B	CD11C	CD124	CD14	CD15	CD163L1	CD1D1	CD21	CD23	CD274	CD31	CD35	CD40	CD43	CD44	CD66B	COX2	CR2	CTR9	EBP	FAM48A	FAM70B	FCER2	FCGRT	FERMT3	FLOT1	FLT1	GIMAP7	GLI4	GNA15	GPR34	GPSM3	HLA-DR	IDO	IKZF1	IL12	IL13	IL18BP	IL1R	IL4RA	INPP5D	ITGA3
[truncated: 37 more columns]

## Sheet: Supplementary Table 8
Supplementary Table 8. Feature gene panels of 3 immunity and immunotherapy relevant signatures.
Immune signatures	Genes
Cytolytic activity	GZMA	PRF1
T cell inflamed signature	CD274	CD276	CCL5	CD27	CD8A	CMKLR1	CXCL9	CXCR6	IDO1	LAG3	NKG7	PDCD1LG2	PSMB10	HLA-DQA1	HLA-DRB1	HLA-E	STAT1	TIGIT
IFNγ signature	GBP1	IFI16	IFI30	IFNG	IRF1	STAT1	TAP1	TAP2	PSMB9	IL15RA	GZMA	GZMB	CXCL10	CXCL9	TBX21
